# Supplementary material for: Palladium-catalyzed radical arylation of N-hydroxyphthalimides with triphenyl phosphites as an unusual arylating agent via C(sp2)–O bond cleavage
Source: Royal Society of Chemistry journal article supplement (doi:10.1039/d3qo01919e), 2023-12-20
Supplement: d3qo01919e1.pdf [file d3qo01919e1.pdf]

## Supporting Information

### **Palladium-Catalyzed Radical Arylation of *N*-Hydroxyphthalimides with Triphenyl Phosphites as an Unusual Arylating Agent via C(sp<sup>2</sup>)-O Bond Cleavage**

Hafiz Noor,<sup>a,b</sup> Pan Gao,<sup>a</sup> Jiandong Guo,<sup>a</sup> Shuwei Zhang,<sup>a</sup> Xiaodong Jia,<sup>a</sup> Yu Yuan,<sup>\*a</sup>

<sup>a</sup>College of Chemistry and Chemical Engineering, Yangzhou University Yangzhou 225002, Jiangsu Province, P. R. China

<sup>b</sup>Faculty of Education, Department of Chemistry, University of Al Fashir, Sudan

\*Corresponding Authors: E-mail: yyuan@yzu.edu.cn

## Table of Contents

|                                                                                                                                               |        |
|-----------------------------------------------------------------------------------------------------------------------------------------------|--------|
| 1. General information.....                                                                                                                   | S2     |
| 2. Preparation method of the starting material <i>N</i> -hydroxyphthalimide derivatives .....                                                 | S2     |
| 3. Preparation method of the starting material triphenyl phosphite derivatives .....                                                          | S2     |
| 4. Preparation of labeled triphenyl phosphite .....                                                                                           | S3     |
| 5. Distinguish of oxygen atom in the target product.....                                                                                      | S4     |
| 6. Preparation of complex <b>5a</b> .....                                                                                                     | S4     |
| 7. Preparation of complex <b>6a</b> .....                                                                                                     | S4     |
| 8. Optimization of the reaction conditions.....                                                                                               | S6     |
| 9. General experimental procedure for the palladium-catalyzed radical arylation with triphenyl phosphites as an un usual arylating agent..... | S7     |
| 10. Hydrolysis of <i>N</i> -aryloxyimide to Aryloxamine.....                                                                                  | S7     |
| 11. Electron Paramagnetic Resonance (EPR) experiments.....                                                                                    | S8     |
| 12. Analytical data of products.....                                                                                                          | S9-20  |
| 13. Copies of <sup>1</sup> H NMR, <sup>13</sup> C NMR, <sup>19</sup> F NMR, and <sup>31</sup> P NMR Spectra .....                             | S22-64 |
| 14. References.....                                                                                                                           | S65    |

## 1-General information

Unless otherwise noted, materials obtained from commercial suppliers are used without further purification. All reactions were performed under air atmosphere except the reaction of the synthesis of **5a** and **6a** complexes were performed under an argon atmosphere. All reactions under standard conditions were monitored by thin-layer chromatography (TLC) on gel F254 plates. Flash column chromatography was carried out using 300–400 mesh silica gel at medium pressure.  $^1\text{H}$  NMR and  $^{13}\text{C}$  NMR spectra were obtained with an Agilent Technologies 400 or 600 spectrometer. Mass spectra were obtained on a Bruker Dalton maXis instrument. Proton spectra were recorded in  $\text{CDCl}_3$  or  $\text{DMSO-d}_6$  and  $^1\text{H}$  NMR chemical shifts were referenced to the residual signals of  $\text{CHCl}_3$  (at  $\delta = 7.26$  ppm) and  $\text{DMSO-d}_6$  (at  $\delta = 2.50$  ppm) respectively.  $^{13}\text{C}$  NMR chemical shifts were referenced against the central line of the solvent signal (for  $\text{CHCl}_3$  at  $\delta = 77.16$  ppm and for  $\text{DMSO-d}_6$  at  $\delta = 39.52$  ppm). Chemical shifts are given on  $\delta$  scale (ppm). Coupling constants (J) are given in Hz. Multiplicities are indicated as follows: s (singlet), d (doublet), t (triplet), q (quartet), quint (quintet), sext (sextet) or m (multiplet).

## 2. Preparation method of the starting material (*N*-hydroxyphthalimide) derivatives

A mixture of hydroxylamine hydrochloride (1.88g, 0.027 mol) and anhydrous sodium acetate (1.80g, 0.022 mol) in glacial acetic acid was refluxed for 5 min. The precipitated sodium chloride was filtered off and the desired 2,3-dicarboxylic acid anhydride (0.02 mol) was added to the filtrate. The mixture was refluxed for further 30 min. The crystalloid obtained on cooling was collected by filtration, dried, and then used directly.<sup>[1]</sup>

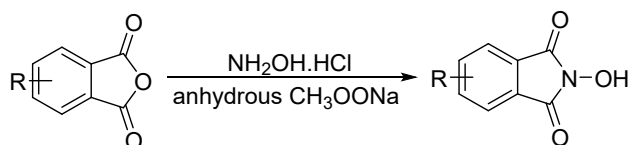

## 3. Preparation method of the starting material (triphenyl phosphite) derivatives

To the solution of appropriate phenol derivatives (50 mmol) and pyridine (4.84 mL, 60 mmol) in dry acetonitrile (200 mL) was added dropwise phosphorus trichloride (1.37 mL, 16 mmol) at room temperature under an inert atmosphere  $\text{N}_2$ . The obtained mixture was refluxed for 5 h. After cooling the product precipitated or deposited as an oil or solid. It was washed with acetonitrile and dried in dessicator. Phosphites were characterized by their  $^{31}\text{P}$  NMR spectra (presence of only a single phosphorus signal) and used directly after synthesis.<sup>[2]</sup>

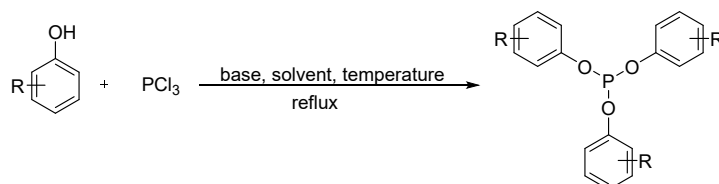

## 4. Preparation of labeled triphenyl phosphite

### Step 1. Preparation of labeled phenol derivative

In an oven-dried quartz vial (20 × 100 mm) equipped with a stir bar was charged with 1-bromo-4-methylbenzene (85.5 mg, 0.5 mmol, 1.0 equiv.), NiBr<sub>2</sub>·glyme (2.0 mol%), 2,2'-bipyridine-5,5'-diamine (dabpy, 2.0 mol%) and g-C<sub>3</sub>N<sub>4</sub> (50 mg). Then, DMF/CH<sub>3</sub>CN (1: 1, 3.0 mL), H<sub>2</sub><sup>18</sup>O (360 μL, 20 equiv.) and Et<sub>3</sub>N (0.75 mmol, 1.5 equiv.) were added and the vial was sealed with a rubber plug. The reaction mixture was stirred for 30 min. Thereafter, the mixture was degassed by bubbling nitrogen for 10 min. The reaction mixture was irradiated under a 300 W xenon lamp (>420 nm) at 25 °C with rapid stirring for 24 h. After that, the solvent was removed under vacuum directly. The residue was purified by flash column chromatography on silica gel using (petroleum ether: ethyl acetate 10: 01) as an eluent to afford the desired product.<sup>[3]</sup>

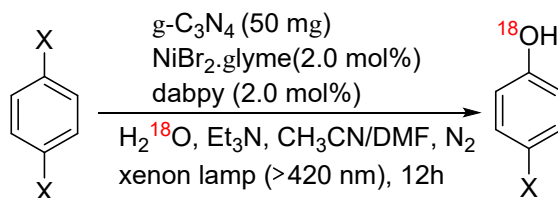

### Step 2. Preparation of labeled triphenyl phosphite derivative

To the solution of appropriate phenol derivatives (50 mmol) and pyridine (4.84 mL, 60 mmol) in dry acetonitrile (200 mL) was added dropwise phosphorus trichloride (1.37 mL, 16 mmol) at room temperature under an inert atmosphere N<sub>2</sub>. The obtained mixture was refluxed for 5 h. After cooling the product precipitated or deposited as an oil or solid. It was washed with acetonitrile and dried in desiccator. Phosphites were characterized by their <sup>31</sup>P NMR spectra (presence of only a single phosphorus signal) and used directly after synthesis.

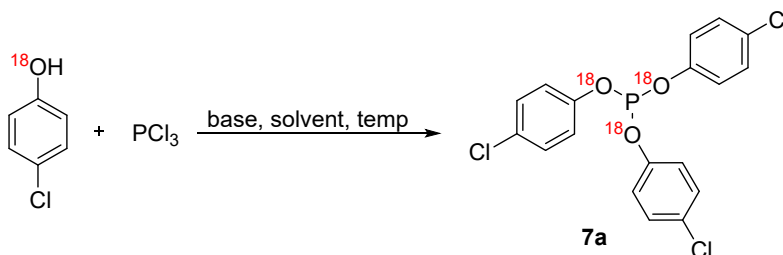

**7a** Yellowish oil. <sup>1</sup>H NMR (400 MHz, CDCl<sub>3</sub>) δ 7.26 – 7.11 (m, 4H), 7.01 (s, 4H), 6.82 – 6.74 (m, 4H). <sup>13</sup>C NMR (101 MHz, CDCl<sub>3</sub>) δ 153.7, 129.6, 125.9, 116.8. <sup>31</sup>P NMR (CDCl<sub>3</sub>, 162 MHz) δ 127.6 ppm. HRMS m/z (ESI): calcd for C<sub>18</sub>H<sub>12</sub>Cl<sub>3</sub><sup>18</sup>O<sub>3</sub>P, [M+H]<sup>+</sup> 440.9609; found to be, 440.9599.

## 5. Distinguish of oxygen atom in the target product

When compound **7a** was used as the starting material to react with **1** under the standard conditions of the reaction system, the resulting product was then tested by HRMS, showing that no labelled oxygen atom was involved in the formed product. Indicating that the oxygen atom in the target product is coming from N-hydroxyphthalimide **1** rather than triphenyl phosphite **2**.

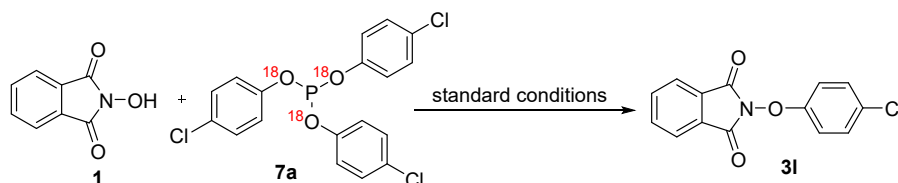

## 6. Preparation of complex **5a**

The reaction was performed under argon atmosphere by using standard Schlenck techniques. To a solution of PdCl<sub>2</sub> (53.2 mg, 0.3 mmol) in benzene (5 mL) was added P(OPh)<sub>3</sub> (1.21 g, 3.9 mmol). The resulting mixture was stirred for 3 h at rt. The reaction mixture was then settled out without stirring for 1 h. The target catalyst was gradually precipitated as a white solid in the reaction mixture. The target complex was filtered off and was washed with ethyl ether (3 mL x 2). The resulting complex was dried in vacuo affording Cl<sub>2</sub>Pd[P(OPh)<sub>3</sub>]<sub>2</sub> as an off-white solid (85 mg, 35% yield).<sup>[4]</sup>

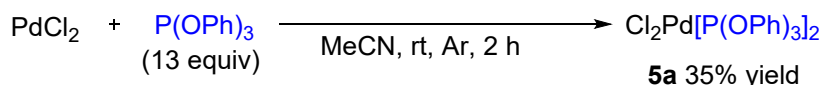

**5a** (dichloro-bis-(triphenylphosphite) palladium (II), white solid 35% yield. <sup>1</sup>H NMR (400 MHz, Chloroform-*d*) δ 7.28 (dd, *J* = 8.6, 6.8 Hz, 12H), 7.27 – 7.18 (m, 6H), 7.14 (d, *J* = 8.3 Hz, 12H). <sup>13</sup>C NMR (101 MHz, Chloroform-*d*) δ 150.5, 150.5, 150.4, 130.0, 125.9, 120.7, 120.7, 120.7. <sup>31</sup>P NMR (CDCl<sub>3</sub>, 162 MHz) δ 83.6 ppm. The spectrum data were in accordance with the literature.<sup>[4]</sup>

## 7. Preparation of complex **6a**

The reaction was performed under argon atmosphere by using standard Schlenck techniques. To a solution of Cl<sub>2</sub>Pd[P(OPh)<sub>3</sub>]<sub>2</sub> (239.4 mg, 0.3 mmol) in benzene (5 mL) was added P(OPh)<sub>3</sub> (931 mg, 3.0 mmol). Then 100 μ of distilled water was added to the formed solution. The resulting mixture was stirred for 1 h at rt. The reaction mixture was then settled out without stirring for 1 h. The target catalyst was gradually precipitated as a white solid in the reaction mixture. The target complex was filtered off and was washed with CH<sub>3</sub>CN (3 mL x 2). The resulting complex was dried in vacuo affording Cl<sub>2</sub>Pd[P(OPh)<sub>3</sub>]<sub>2</sub> as an off-white solid (164 mg, 53% yield).<sup>[4]</sup>

S4

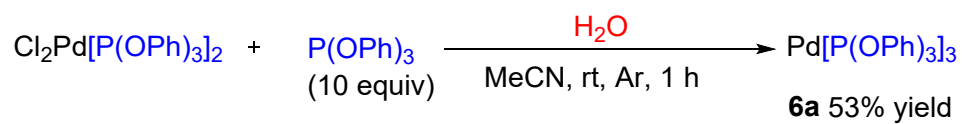

**6a** (tris-(triphenylphosphite) palladium (0), white solid 53% yield. <sup>1</sup>H NMR (400 MHz, C<sub>6</sub>D<sub>6</sub>) δ 7.04 (d, *J* = 7.9 Hz, 18H), 6.99 (t, *J* = 8.0 Hz, 18H), 6.83 (t, *J* = 7.3 Hz, 9H). <sup>13</sup>C NMR (101 MHz, C<sub>6</sub>D<sub>6</sub>) <sup>13</sup>C NMR (101 MHz, C<sub>6</sub>D<sub>6</sub>) δ 152.0, 129.3, 127.9, 127.7, 127.4, 123.8, 121.2. <sup>31</sup>P NMR (C<sub>6</sub>D<sub>6</sub>, 202 MHz,) δ 137.8 ppm. The spectrum data were in accordance with the literature.<sup>[5]</sup>

8. Table S1. Optimization of the reaction study<sup>a</sup>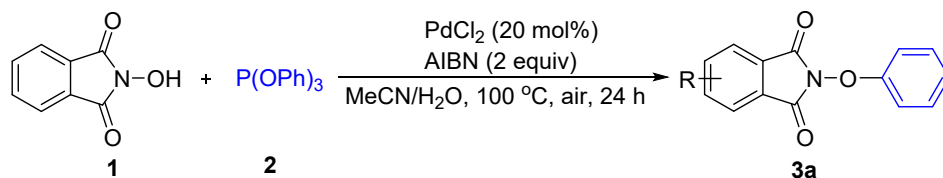

| Entry           | Catalyst mol%            | Equiv of P(OPh) <sub>3</sub> | Equiv of AIBN | Solvent                       | Temp °C | Yield% <sup>b</sup> |
|-----------------|--------------------------|------------------------------|---------------|-------------------------------|---------|---------------------|
| 1               | -                        | 2.0                          | 2.0           | DCE                           | rt      | 0                   |
| 2               | CuCl 10                  | 2.0                          | 2.0           | DCE                           | 50      | 0                   |
| 3               | CuCl 10                  | 2.0                          | 2.0           | DCE                           | 80      | 0                   |
| 4               | Ni(acac) <sub>2</sub> 10 | 2.0                          | 2.0           | DCE                           | 80      | 0                   |
| 5               | Ni(acac) <sub>2</sub> 10 | 3.0                          | 2.0           | DCE                           | 80      | 0                   |
| 6               | Ni(acac) <sub>2</sub> 10 | 4.0                          | 2.0           | DCE                           | 80      | trace               |
| 7               | PdCl <sub>2</sub> 5      | 4.0                          | -             | DCE                           | 80      | 0                   |
| 8               | PdCl <sub>2</sub> 5      | 4.0                          | 2.0           | MeCN                          | 80      | trace               |
| 9               | PdCl <sub>2</sub> 10     | 5.0                          | 2.0           | MeCN                          | 80      | trace               |
| 10              | PdCl <sub>2</sub> 10     | 6.0                          | 2.0           | MeCN                          | 80      | trace               |
| 11              | PdCl <sub>2</sub> 20     | 6.0                          | 2.0           | MeCN                          | 100     | 55                  |
| 12              | PdCl <sub>2</sub> 20     | 6.0                          | -             | MeCN                          | 100     | 35                  |
| 13              | PdCl <sub>2</sub> 20     | 6.0                          | 2.0           | MeCN/100μ H <sub>2</sub> O    | 100     | 86                  |
| 14              | PdCl <sub>2</sub> 20     | 6.0                          | -             | MeCN/100μ H <sub>2</sub> O    | 100     | 77                  |
| 15              | PdCl <sub>2</sub> 20     | 5.0                          | 2.0           | MeCN/100μ H <sub>2</sub> O    | 100     | 78                  |
| 16              | PdCl <sub>2</sub> 20     | 4.0                          | 2.0           | MeCN/100μ H <sub>2</sub> O    | 100     | 69                  |
| 18              | PdCl <sub>2</sub> 20     | 3.0                          | 2.0           | MeCN/100μ H <sub>2</sub> O    | 100     | 58                  |
| 19              | PdCl <sub>2</sub> 20     | 7.0                          | 2.0           | MeCN/100μ H <sub>2</sub> O    | 100     | 87                  |
| 20              | PdCl <sub>2</sub> 20     | 6.0                          | 1.0           | MeCN/100μ H <sub>2</sub> O    | 100     | 79                  |
| 21              | Pd(dba) <sub>3</sub> 10  | 6.0                          | 2.0           | MeCN/100μ H <sub>2</sub> O    | 100     | 79                  |
| 22              | Pd(OAc) <sub>2</sub> 10  | 6.0                          | 2.0           | MeCN/100μ H <sub>2</sub> O    | 100     | 67                  |
| 23              | PdCl <sub>2</sub> 20     | 6.0                          | 2.0           | DCE/100μ H <sub>2</sub> O     | 100     | 80                  |
| 24              | PdCl <sub>2</sub> 20     | 6.0                          | 2.0           | THF/100μ H <sub>2</sub> O     | 100     | 76                  |
| 25              | PdCl <sub>2</sub> 20     | 6.0                          | 2.0           | toluene/100μ H <sub>2</sub> O | 100     | 16                  |
| 26 <sup>c</sup> | PdCl <sub>2</sub> 20     | 6.0                          | 2.0           | MeCN/100μ H <sub>2</sub> O    | 100     | 78                  |
| 27 <sup>d</sup> | PdCl <sub>2</sub> 20     | 6.0                          | 2.0           | MeCN/100μ H <sub>2</sub> O    | 100     | 65                  |

<sup>a</sup>Reaction conditions. <sup>b</sup>Isolated yield after chromatography. <sup>c</sup>Reaction under O<sub>2</sub>. <sup>d</sup>Reaction under N<sub>2</sub>

## 9. General experimental procedure for the Palladium-Catalyzed Radical Arylation of *N*-Hydroxyphthalimides with Triphenyl Phosphites as an Unusual Arylating Agent via C(sp<sup>2</sup>)-O Bond Cleavage

### 3a as an example:

To a solution of *N*-hydroxyphthalimide (NHPI) **1** (0.3 mmol, 49 mg, 1.0 equiv), 2,2'-Azobis(2-methylpropionitrile) (AIBN) (0.6 mmol, 98.5 mg, 2.0 equiv), PdCl<sub>2</sub> (20 mol%, 10.6 mg), in acetonitrile (2.0 mL), triphenyl phosphite (TPP) **2** (1.8 mmol, 558.5 mg, 6.0 equiv), and distilled water (100 μL) were added in a sealed tube equipped with a magnetic stirrer bar. The sealed tube was then tightly sealed with a screw cap, and the reaction system was stirred for 24 h at 100 °C in an air atmosphere. The reaction mixture was then cooled to room temperature. After the solvent was removed under vacuum directly, the residue was purified by flash column chromatography on silica gel using petroleum ether: ethyl acetate (05:01) as a gradient eluent to afford the desired product **3a**.

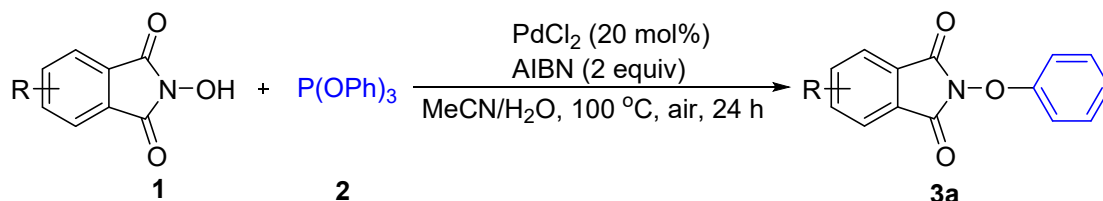

## 10. Hydrolysis of *N*-aryloxyimide to Aryloxamine

To a solution of **3a** (0.25 mmol, 60 mg) in 2.5 mL CHCl<sub>3</sub> under stirring conditions, NH<sub>3</sub> (1.0 mL, 7N in methanol) was added dropwise at room temperature. Stirring was continued for 12 h and then concentrated under reduced pressure. After that the crude reaction mixture was adsorbed to silica and transfer to a plug of silica gel, washing with 20% Et<sub>2</sub>O in pentane (100 mL). Removal of solvent under reduced pressure afforded yellowish oil **4a** in 91% yield.

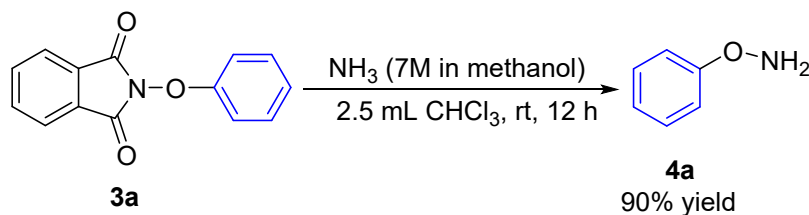



## 11. EPR Experiments

### General

EPR experiments were carried out using (Bruker BioSpin GmbH). EPR spectrometer was used with the following instrumental parameters: microwave frequency = 9.849 GHz; incident microwave power 20 Mw; Center Field: 3508 G; scan range 200 G; modulation amplitude = 1 G; receiver gain: 1.00e+003; and time constant = 163.84 ms.

To a solution of *N*-hydroxyphthalimide **1** (0.3 mmol, 49 mg, 1.0 equiv), PdCl<sub>2</sub> (20 mol%, 10.6 mg), in benzene (2.0 mL), triphenyl phosphite **2** (1.8 mmol, 558.5 mg, 6.0 equiv), and 5,5-dimethyl-1-pyrroline N-oxide (DMPO) (1.8 mmol, 203.7 mg, 6.0 equiv) were added in a sealed tube. The sealed tube was then tightly sealed with a screw cap, and the reaction system was stirred for 6 hours at 100 °C in an air atmosphere. Then the solution was taken out into a small tube and was analyzed by EPR.

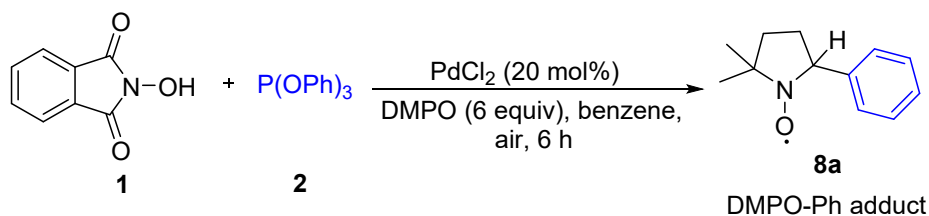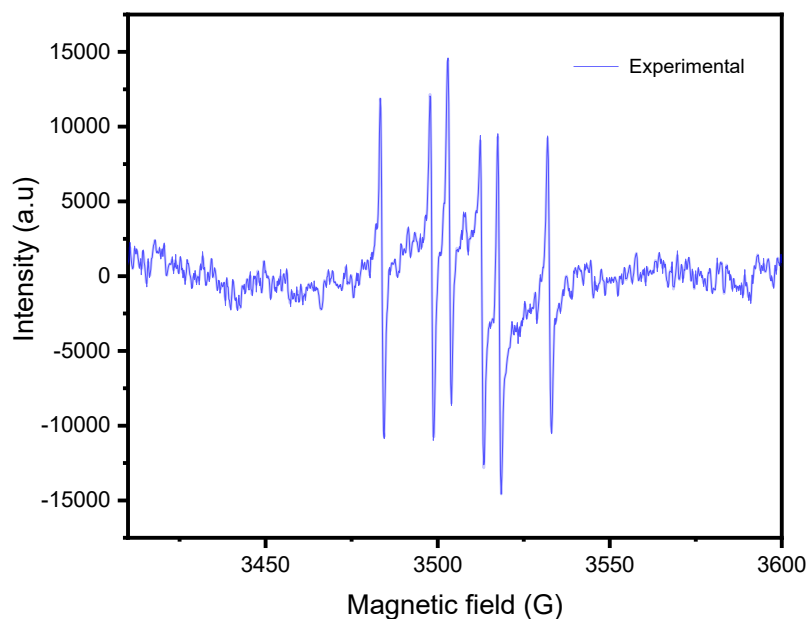

**Figure S1.** EPR spectrum of the spin adduct **8a** generated upon the above-mentioned reaction conditions

## 12. Analytical data of products

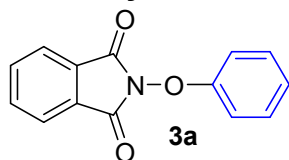

### 2-phenoxyisoindoline-1,3-dione

**3a** was synthesized according to the above mentioned general experimental procedure in section 7. White solid (62 mg, 86% yield).

**<sup>1</sup>H NMR (400 MHz, CDCl<sub>3</sub>)** δ 7.89 (dd, *J* = 5.5, 3.1 Hz, 2H), 7.79 (dd, *J* = 5.5, 3.1 Hz, 2H), 7.37 – 7.27 (m, 2H), 7.17 (d, *J* = 1.3 Hz, 1H), 7.18 – 7.08 (m, 2H). **<sup>13</sup>C NMR (101 MHz, CDCl<sub>3</sub>)** δ 162.9, 158.8, 134.9, 129.7, 128.8, 124.6, 124.0, 114.4. All spectral data correspond to those given in the literature.<sup>[6]</sup>

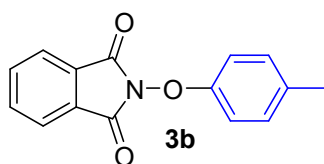

### 2-(p-tolyloxy)isoindoline-1,3-dione

**3b** was synthesized according to the above mentioned general experimental procedure in section 7. White solid (68.5 mg, 90% yield).

**<sup>1</sup>H NMR (400 MHz, CDCl<sub>3</sub>)** δ 7.89 (dd, *J* = 5.4, 3.1 Hz, 2H), 7.78 (dd, *J* = 5.5, 3.1 Hz, 2H), 7.16 – 7.03 (m, 4H), 2.30 (s, 3H). **<sup>13</sup>C NMR (101 MHz, CDCl<sub>3</sub>)** δ 163.0, 156.9, 134.8, 134.3, 130.1, 128.8, 123.9, 114.7, 20.6. All spectral data correspond to those given in the literature.<sup>[6]</sup>

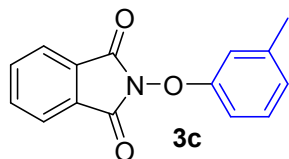

### 2-(m-tolyloxy)isoindoline-1,3-dione

**3c** was synthesized according to the above mentioned general experimental procedure in section 7. White solid (64 mg, 84% yield).

**<sup>1</sup>H NMR (400 MHz, CDCl<sub>3</sub>)** δ 7.89 (dd, *J* = 5.5, 3.1 Hz, 2H), 7.79 (dd, *J* = 5.5, 3.1 Hz, 2H), 7.20 (t, *J* = 7.8 Hz, 1H), 7.00 – 6.90 (m, 3H), 2.32 (d, *J* = 0.8 Hz, 3H). **<sup>13</sup>C NMR (101 MHz, CDCl<sub>3</sub>)** δ 163.0, 158.9, 140.1, 134.9, 129.4, 128.8, 125.4, 123.9, 114.9, 111.3, 21.4. All spectral data correspond to those given in the literature.<sup>[6]</sup>

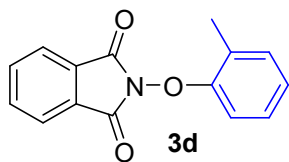

### 2-(o-tolyloxy)isoindoline-1,3-dione

**3d** was synthesized according to the above mentioned general experimental procedure in section 7. White solid (56 mg, 74% yield).

**<sup>1</sup>H NMR (400 MHz, CDCl<sub>3</sub>)** δ 7.89 (dd, *J* = 5.5, 3.1 Hz, 2H), 7.79 (dd, *J* = 5.5, 3.1 Hz, 2H), 7.20 (ddd, *J* = 7.3, 1.8, 0.9 Hz, 1H), 7.10 (td, *J* = 7.8, 1.8 Hz, 1H), 7.02 (td, *J* = 7.4, 1.3 Hz, 1H), 6.93 (dd, *J* = 8.2, 1.2 Hz, 1H), 2.47 (s, 3H). **<sup>13</sup>C NMR (101 MHz, CDCl<sub>3</sub>)** δ 163.0, 157.0, 134.8, 131.5, 128.9, 127.0, 126.0, 124.3, 123.9, 112.7, 15.8. All spectral data correspond to those given in the literature.<sup>[6]</sup>

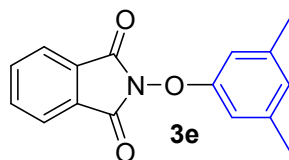

### 2-(3,5-dimethylphenoxy)isoindoline-1,3-dione

**3e** was synthesized according to the above mentioned general experimental procedure in section 7. White solid (71 mg, 88% yield).

**<sup>1</sup>H NMR (400 MHz, CDCl<sub>3</sub>)** δ 7.90 (dd, *J* = 5.5, 3.1 Hz, 2H), 7.80 (dd, *J* = 5.5, 3.1 Hz, 2H), 6.78 – 6.73 (m, 3H), 2.27 (d, *J* = 0.8 Hz, 6H). **<sup>13</sup>C NMR (101 MHz, CDCl<sub>3</sub>)** δ 163.0, 158.9, 139.7, 134.8, 128.8, 126.3, 123.9, 111.8, 21.3. All spectral data correspond to those given in the literature.<sup>[6]</sup>

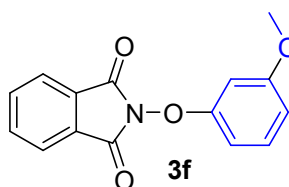

### 2-(3-methoxyphenoxy)isoindoline-1,3-dione

**3f** was synthesized according to the above mentioned general experimental procedure in section 7. White solid (53.5 mg, 66% yield).

**<sup>1</sup>H NMR (400 MHz, CDCl<sub>3</sub>)** δ 7.87 (dd, *J* = 5.4, 3.1 Hz, 2H), 7.77 (dd, *J* = 5.5, 3.1 Hz, 2H), 7.19 (t, *J* = 8.6 Hz, 1H), 6.73 – 6.66 (m, 2H), 6.64 (ddd, *J* = 8.2, 2.2, 0.9 Hz, 1H), 3.75 (s, 3H). **<sup>13</sup>C NMR (101 MHz, CDCl<sub>3</sub>)**

δ 162.8, 160.8, 159.9, 134.9, 130.2, 128.7, 123.9, 110.1, 106.0, 100.6, 55.5, 55.4. All spectral data correspond to those given in the literature.<sup>[6]</sup>

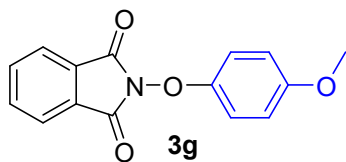

### 2-(4-methoxyphenoxy)isoindoline-1,3-dione

**3g** was synthesized according to the above mentioned general experimental procedure in section 7. White solid (58 mg, 72% yield).

**<sup>1</sup>H NMR (400 MHz, DMSO-*d*<sub>6</sub>)** δ 7.96 – 7.81 (m, 4H), 7.23 – 7.14 (m, 2H), 6.98 – 6.84 (m, 2H), 3.70 (s, 3H). **<sup>13</sup>C NMR (101 MHz, DMSO-*d*<sub>6</sub>)** δ 169.7, 163.4, 156.4, 152.9, 135.5, 135.0, 134.7, 133.0, 132.4, 129.0, 124.1, 123.7, 123.3, 115.7, 115.1, 55.9, 55.9. All spectral data correspond to those given in the literature.<sup>[6]</sup>

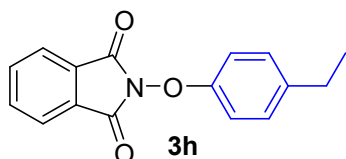

### 2-(4-ethylphenoxy)isoindoline-1,3-dione

**3h** was synthesized according to the above mentioned general experimental procedure in section 7. White solid (55.5 mg, 69% yield).

**<sup>1</sup>H NMR (400 MHz, CDCl<sub>3</sub>)** δ 7.94 – 7.84 (m, 2H), 7.83 – 7.75 (m, 2H), 7.18 – 7.06 (m, 4H), 2.60 (q, *J* = 7.6 Hz, 2H), 1.19 (td, *J* = 7.5, 0.7 Hz, 3H). **<sup>13</sup>C NMR (101 MHz, CDCl<sub>3</sub>)** δ 163.0, 157.0, 140.7, 134.8, 129.0, 128.8, 123.9, 114.8, 28.1, 15.7. **HRMS *m/z* (ESI):** calcd for C<sub>16</sub>H<sub>13</sub>NO<sub>3</sub>, [M+H]<sup>+</sup> 268.0968; found to be 268.0959.

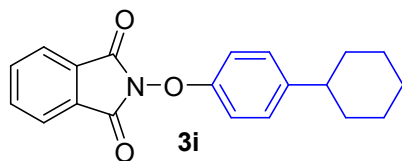

### 2-(4-cyclohexylphenoxy)isoindoline-1,3-dione

**3i** was synthesized according to the above mentioned general experimental procedure in section 7. White solid (74.5 mg, 77% yield).

**<sup>1</sup>H NMR (400 MHz, CDCl<sub>3</sub>)** δ 7.88 (td, *J* = 7.5, 6.3, 2.9 Hz, 2H), 7.78 (td, *J* = 7.5, 6.3, 3.1 Hz, 2H), 7.18 – 7.04 (m, 4H), 1.82 (d, *J* = 9.2 Hz, 4H), 1.71 (dd, *J* = 10.5, 5.7 Hz, 1H), 1.35 (tt, *J* = 11.0, 5.6 Hz, 4H), 1.23 (s, 2H), 1.23 (d, *J* = 17.2 Hz, 0H). **<sup>13</sup>C NMR (101 MHz, CDCl<sub>3</sub>)** δ 163.0, 157.0, 144.6, 134.8, 128.8, 127.9, 127.9, 123.9, 114.6, 114.6, 43.8, 34.5, 34.5, 26.8, 26.8, 26.1. **HRMS *m/z* (ESI):** calcd for C<sub>20</sub>H<sub>19</sub>NO<sub>3</sub>, [M+H]<sup>+</sup> 322.1435; found to be 322.1438.

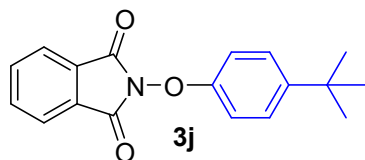

### 2-(4-(tert-butyl)phenoxy)isoindoline-1,3-dione

**3j** was synthesized according to the above mentioned general experimental procedure in section 7. White solid (73 mg, 82% yield).

**<sup>1</sup>H NMR (400 MHz, CDCl<sub>3</sub>)** δ 7.88 (dd, *J* = 5.5, 3.1 Hz, 2H), 7.78 (dd, *J* = 5.5, 3.1 Hz, 2H), 7.37 – 7.29 (m, 2H), 7.14 – 7.06 (m, 2H), 1.27 (s, 9H). **<sup>13</sup>C NMR (101 MHz, CDCl<sub>3</sub>)** δ 163.0, 156.7, 147.6, 134.8, 128.8, 126.6, 123.9, 114.2, 34.3, 31.4. All spectral data correspond to those given in the literature.<sup>[6]</sup>

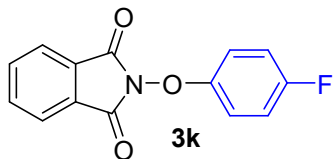

### 2-(4-fluorophenoxy)isoindoline-1,3-dione

**3k** was synthesized according to the above mentioned general experimental procedure in section 7. White solid (54 mg, 70% yield).

**<sup>1</sup>H NMR (400 MHz, CDCl<sub>3</sub>)** δ 7.88 (dd, *J* = 5.4, 3.1 Hz, 2H), 7.78 (dd, *J* = 5.5, 3.1 Hz, 2H), 7.24 – 7.14 (m, 2H), 7.05 – 6.94 (m, 2H). **<sup>13</sup>C NMR (101 MHz, CDCl<sub>3</sub>)** δ 162.9, 160.8, 158.4, 154.9, 154.9, 134.9, 128.7, 124.0, 117.1, 117.1, 116.4, 116.1. All spectral data correspond to those given in the literature.<sup>[6]</sup>

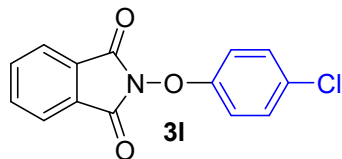

### 2-(4-chlorophenoxy)isoindoline-1,3-dione

**3l** was synthesized according to the above mentioned general experimental procedure in section 7. White solid (66 mg, 80% yield).

**<sup>1</sup>H NMR (400 MHz, CDCl<sub>3</sub>)** δ 7.89 (dd, *J* = 5.5, 3.1 Hz, 2H), 7.80 (dd, *J* = 5.5, 3.1 Hz, 2H), 7.32 – 7.24 (m, 2H), 7.16 – 7.07 (m, 2H). **<sup>13</sup>C NMR (101 MHz, CDCl<sub>3</sub>)** δ 162.8, 157.5, 135.0, 129.8, 129.7, 128.7, 124.1, 116.2. All spectral data correspond to those given in the literature.<sup>[7]</sup>

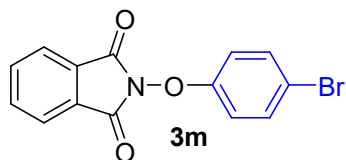

### 2-(4-bromophenoxy)isoindoline-1,3-dione

**3m** was synthesized according to the above mentioned general experimental procedure in section 7. White solid (78 mg, 82% yield).

**<sup>1</sup>H NMR (400 MHz, CDCl<sub>3</sub>)** δ 7.89 (dd, *J* = 5.5, 3.1 Hz, 2H), 7.79 (dd, *J* = 5.5, 3.1 Hz, 2H), 7.46 – 7.38 (m, 2H), 7.10 – 7.01 (m, 2H). **<sup>13</sup>C NMR (101 MHz, CDCl<sub>3</sub>)** δ 162.8, 158.0, 135.0, 132.6, 128.7, 124.1, 117.2, 116.5. All spectral data correspond to those given in the literature.<sup>[6]</sup>

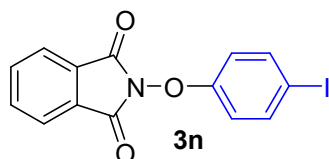

### 2-(4-iodophenoxy)isoindoline-1,3-dione

**3n** was synthesized according to the above mentioned general experimental procedure in section 7. White solid (55 mg, 50% yield).

**<sup>1</sup>H NMR (400 MHz, CDCl<sub>3</sub>)** δ 7.89 (dd, *J* = 5.5, 3.1 Hz, 2H), 7.79 (dd, *J* = 5.5, 3.1 Hz, 2H), 7.65 – 7.56 (m, 2H), 6.97 – 6.89 (m, 2H). **<sup>13</sup>C NMR (101 MHz, CDCl<sub>3</sub>)** δ 162.7, 158.9, 138.6, 135.0, 128.7, 124.1, 116.7, 87.6. All spectral data correspond to those given in the literature.<sup>[7]</sup>

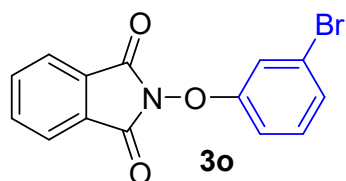

### 2-(3-bromophenoxy)isoindoline-1,3-dione

**3o** was synthesized according to the above mentioned general experimental procedure in section 7. White solid (74.5 mg, 78% yield).

**<sup>1</sup>H NMR (400 MHz, CDCl<sub>3</sub>)** δ 7.91 (dd, *J* = 5.5, 3.1 Hz, 2H), 7.82 (dd, *J* = 5.5, 3.1 Hz, 2H), 7.33 – 7.21 (m, 2H), 7.20 (t, *J* = 8.1 Hz, 1H), 7.11 (ddd, *J* = 8.2, 2.5, 1.1 Hz, 1H). **<sup>13</sup>C NMR (101 MHz, CDCl<sub>3</sub>)** δ 162.7, 159.3, 135.1, 130.9, 128.7, 127.8, 124.1, 122.9, 117.7, 113.3. All spectral data correspond to those given in the literature.<sup>[6]</sup>

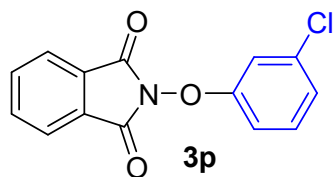

### 2-(3-chlorophenoxy)isoindoline-1,3-dione

**3p** was synthesized according to the above mentioned general experimental procedure in section 7. White solid (62 mg, 75% yield).

**<sup>1</sup>H NMR (400 MHz, CDCl<sub>3</sub>)** δ 7.92 (dd, *J* = 5.5, 3.1 Hz, 2H), 7.82 (dd, *J* = 5.5, 3.1 Hz, 2H), 7.26 (t, *J* = 8.2 Hz, 1H), 7.18 – 7.03 (m, 3H). **<sup>13</sup>C NMR (101 MHz, CDCl<sub>3</sub>)** δ 162.7, 159.3, 135.2, 135.1, 130.6, 128.7, 124.9, 124.1, 114.9, 112.7. All spectral data correspond to those given in the literature.<sup>[7]</sup>

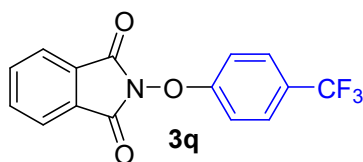

### 2-(4-(trifluoromethyl)phenoxy)isoindoline-1,3-dione

**3q** was synthesized according to the above mentioned general experimental procedure in section 7. White solid (60 mg, 65% yield).

**<sup>1</sup>H NMR (400 MHz, CDCl<sub>3</sub>)** δ 7.92 (dd, *J* = 5.5, 3.1 Hz, 2H), 7.82 (dd, *J* = 5.5, 3.1 Hz, 2H), 7.64 – 7.56 (m, 2H), 7.27 – 7.19 (m, 2H). **<sup>13</sup>C NMR (101 MHz, CDCl<sub>3</sub>)** δ 162.6, 161.0, 161.0, 135.1, 128.7, 127.3, 127.3, 127.3, 127.2, 126.9, 126.6, 126.3, 125.2, 124.2, 122.5, 114.2. All spectral data correspond to those given in the literature.<sup>[6]</sup>

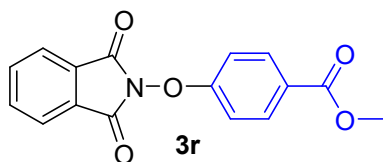

### methyl 4-((1,3-dioxoisoindolin-2-yl)oxy)benzoate

**3r** was synthesized according to the above mentioned general experimental procedure in section 7. White solid (57 mg, 64% yield).

**<sup>1</sup>H NMR (400 MHz, DMSO-*d*<sub>6</sub>)** δ 7.99 – 7.86 (m, 2H), 7.79 (s, 2H), 7.77, 7.44 – 7.36 (m, 2H), 6.86 – 6.78 (m, 2H), 3.78 (d, *J* = 22.5 Hz, 3H). **<sup>13</sup>C NMR (101 MHz, DMSO-*d*<sub>6</sub>)** δ 169.7, 166.5, 165.8, 163.1, 162.4, 162.4, 135.6, 134.7, 133.0, 131.9, 131.8, 129.2, 125.9, 124.2, 123.3, 120.7, 115.8, 113.7, 52.6, 52.5, 52.0, 52.0. All spectral data correspond to those given in the literature.<sup>[7]</sup>

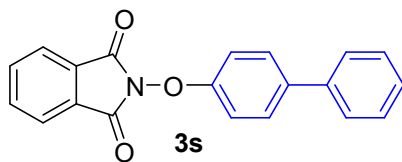

### 2-([1,1'-biphenyl]-4-yloxy)isoindoline-1,3-dione

**3s** was synthesized according to the above mentioned general experimental procedure in section 7. White solid (45 mg, 47% yield).

**<sup>1</sup>H NMR (400 MHz, CDCl<sub>3</sub>)** δ 7.92 (dd, *J* = 5.5, 3.1 Hz, 2H), 7.87 – 7.76 (m, 2H), 7.59 – 7.48 (m, 4H), 7.46 – 7.38 (m, 2H), 7.38 – 7.29 (m, 1H), 7.33 – 7.21 (m, 2H). **<sup>13</sup>C NMR (101 MHz, CDCl<sub>3</sub>)** δ 162.9, 158.4, 140.2, 137.9, 134.9, 128.8, 128.5, 127.3, 127.0, 124.0, 114.8. **HRMS m/z (ESI):** calcd for C<sub>20</sub>H<sub>13</sub>NO<sub>3</sub>, [M+H]<sup>+</sup> 316.0968; found to be, 316.0961.

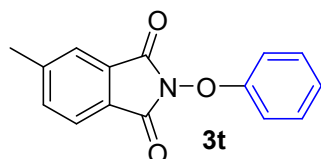

### 5-methyl-2-phenoxyisoindoline-1,3-dione

**3t** was synthesized according to the above mentioned general experimental procedure in section 7. White solid (65 mg, 85% yield).

**<sup>1</sup>H NMR (400 MHz, CDCl<sub>3</sub>)** δ 7.78 (d, *J* = 7.7 Hz, 1H), 7.74 – 7.68 (m, 1H), 7.58 (ddd, *J* = 7.6, 1.6, 0.8 Hz, 1H), 7.37 – 7.27 (m, 2H), 7.16 (q, *J* = 1.4, 0.9 Hz, 1H), 7.18 – 7.07 (m, 2H), 2.53 (s, 3H). **<sup>13</sup>C NMR (101 MHz, CDCl<sub>3</sub>)** δ 163.2, 163.1, 158.9, 146.4, 135.4, 129.7, 129.1, 126.1, 124.5, 123.9, 114.3, 22.2. **HRMS m/z (ESI):** calcd for C<sub>15</sub>H<sub>11</sub>NO<sub>3</sub>, [M+H]<sup>+</sup> 254.0812; found to be, 254.0805.

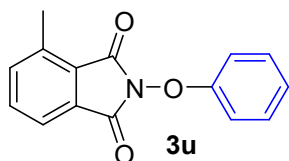

### 4-methyl-2-phenoxyisoindoline-1,3-dione

**3u** was synthesized according to the above mentioned general experimental procedure in section 7. White solid (61 mg, 80% yield).

**<sup>1</sup>H NMR (400 MHz, CDCl<sub>3</sub>)** δ 7.70 (dd, *J* = 7.4, 1.0 Hz, 1H), 7.67 – 7.41 (m, 2H), 7.35 – 7.27 (m, 2H), 7.19 – 7.11 (m, 2H), 7.10 (td, *J* = 7.2, 1.1 Hz, 1H), 2.67 (d, *J* = 8.9 Hz, 3H). **<sup>13</sup>C NMR (101 MHz, CDCl<sub>3</sub>)** δ 169.1, 168.3, 163.7, 163.0, 158.9, 138.8, 138.3, 137.3, 136.6, 134.4, 133.8, 133.1, 129.7, 129.3, 129.1, 125.4, 124.5, 121.6, 121.1, 114.4, 17.7, 17.5. **HRMS m/z (ESI):** calcd for C<sub>15</sub>H<sub>11</sub>NO<sub>3</sub>, [M+H]<sup>+</sup> 254.0812; found to be, 254.0805.



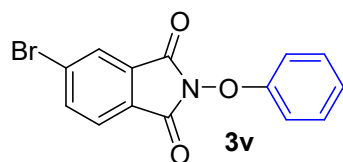

### 5-bromo-2-phenoxyisoindoline-1,3-dione

**3v** was synthesized according to the above mentioned general experimental procedure in section 7. White solid (68 mg, 71% yield).

**<sup>1</sup>H NMR (400 MHz, CDCl<sub>3</sub>)** δ 8.03 (d, *J* = 1.6 Hz, 1H), 7.93 (dd, *J* = 7.9, 1.7 Hz, 1H), 7.76 (dd, *J* = 8.0, 0.5 Hz, 1H), 7.38 – 7.28 (m, 2H), 7.19 – 7.09 (m, 3H). **<sup>13</sup>C NMR (101 MHz, CDCl<sub>3</sub>)** δ 162.2, 161.6, 158.7, 137.9, 130.3, 129.9, 129.8, 127.3, 127.3, 127.2, 125.4, 124.8, 114.5. **HRMS m/z (ESI):** calcd for C<sub>14</sub>H<sub>8</sub>BrNO<sub>3</sub>, [M+H]<sup>+</sup> 317.9760; found to be, 317.9752.

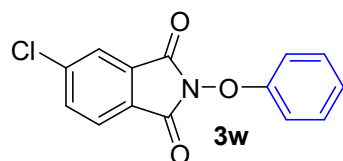

### 5-chloro-2-phenoxyisoindoline-1,3-dione

**3w** was synthesized according to the above mentioned general experimental procedure in section 7. White solid (62.5 mg, 76% yield).

**<sup>1</sup>H NMR (400 MHz, CDCl<sub>3</sub>)** δ 7.89 – 7.80 (m, 2H), 7.76 (dd, *J* = 8.0, 1.8 Hz, 1H), 7.38 – 7.28 (m, 2H), 7.19 – 7.09 (m, 3H). **<sup>13</sup>C NMR (101 MHz, CDCl<sub>3</sub>)** δ 162.0, 161.7, 158.7, 141.7, 134.9, 130.4, 129.8, 126.8, 125.3, 124.8, 124.4, 124.4, 114.5. **HRMS m/z (ESI):** calcd for C<sub>14</sub>H<sub>8</sub>ClNO<sub>3</sub>, [M+ H]<sup>+</sup> 274.0265; found to be, 274.0258.

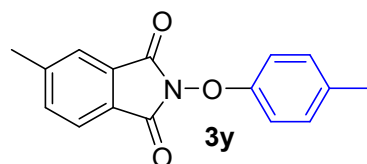

### 5-methyl-2-(p-tolyloxy)isoindoline-1,3-dione

**3y** was synthesized according to the above mentioned general experimental procedure in section 7. White solid (77 mg, 96% yield).

**<sup>1</sup>H NMR (400 MHz, CDCl<sub>3</sub>)** δ 7.75 (d, *J* = 7.7 Hz, 1H), 7.68 (dt, *J* = 1.5, 0.7 Hz, 1H), 7.56 (ddd, *J* = 7.7, 1.6, 0.8 Hz, 1H), 7.15 – 7.02 (m, 4H), 2.51 (s, 3H), 2.29 (s, 3H). **<sup>13</sup>C NMR (101 MHz, CDCl<sub>3</sub>)** δ 163.2, 163.1, 157.0, 146.3, 135.3, 134.2, 130.1, 129.1, 126.1, 124.4, 123.9, 114.6, 22.1, 20.6, 20.6. **HRMS m/z (ESI):** calcd for C<sub>16</sub>H<sub>13</sub>NO<sub>3</sub>, [M+H]<sup>+</sup> 268.0968; found to be, 268.0961.

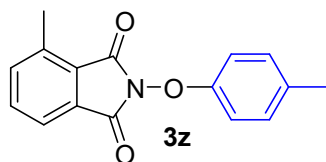

#### 4-methyl-2-(p-tolyloxy)isoindoline-1,3-dione

**3z** was synthesized according to the above mentioned general experimental procedure in section 7. White solid (73 mg, 91% yield).

**<sup>1</sup>H NMR (400 MHz, CDCl<sub>3</sub>)** δ 7.74 – 7.56 (m, 2H), 7.52 (dt, *J* = 7.8, 0.9 Hz, 1H), 7.15 – 7.04 (m, 4H), 2.70 (s, 3H), 2.30 (s, 3H). **<sup>13</sup>C NMR (101 MHz, CDCl<sub>3</sub>)** δ 163.8, 163.1, 157.0, 138.8, 137.2, 134.2, 130.1, 129.2, 125.5, 121.5, 114.8, 20.6, 20.6, 17.7, 17.6. **HRMS m/z (ESI):** calcd for C<sub>16</sub>H<sub>13</sub>NO<sub>3</sub>, [M+H]<sup>+</sup> 268.0968; found to be, 268.0961.

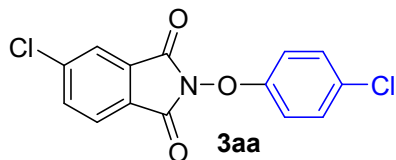

#### 5-chloro-2-(4-chlorophenoxy)isoindoline-1,3-dione

**3aa** was synthesized according to the above mentioned general experimental procedure in section 7. White solid (58 mg, 63% yield).

**<sup>1</sup>H NMR (400 MHz, CDCl<sub>3</sub>)** δ 7.91 – 7.82 (m, 2H), 7.77 (dd, *J* = 8.0, 1.8 Hz, 1H), 7.37 – 7.18 (m, 2H), 7.18 – 7.08 (m, 2H). **<sup>13</sup>C NMR (101 MHz, CDCl<sub>3</sub>)** δ 161.9, 161.6, 157.3, 141.9, 135.1, 130.3, 130.1, 129.7, 126.7, 125.4, 124.5, 116.4. **HRMS m/z (ESI):** calcd for C<sub>14</sub>H<sub>7</sub>Cl<sub>2</sub>NO<sub>3</sub>, [M+H]<sup>+</sup> 307.9876; found to be, 307.9870.

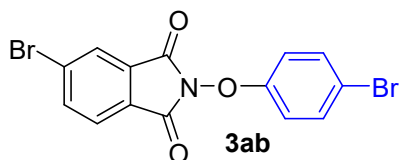

#### 5-bromo-2-(4-bromophenoxy)isoindoline-1,3-dione

**3ab** was synthesized according to the above mentioned general experimental procedure in section 7. White solid (80 mg, 67% yield).

**<sup>1</sup>H NMR (400 MHz, CDCl<sub>3</sub>)** δ 8.04 (dd, *J* = 1.7, 0.5 Hz, 1H), 7.95 (dd, *J* = 8.0, 1.7 Hz, 1H), 7.77 (dd, *J* = 8.0, 0.6 Hz, 1H), 7.48 – 7.40 (m, 2H), 7.10 – 7.01 (m, 2H). **<sup>13</sup>C NMR (101 MHz, CDCl<sub>3</sub>)** δ 162.0, 161.5, 157.9, 138.0, 132.7, 130.2, 130.1, 127.4, 127.1, 125.4, 117.5, 116.6. **HRMS m/z (ESI):** calcd for C<sub>14</sub>H<sub>7</sub>Br<sub>2</sub>NO<sub>3</sub>, [M+H]<sup>+</sup> 397.8845; found to be, 397.8840.

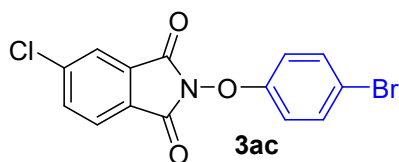

### 2-(4-bromophenoxy)-5-chloroisoindoline-1,3-dione

**3ac** was synthesized according to the above mentioned general experimental procedure in section 7. White solid (76 mg, 72% yield).

**<sup>1</sup>H NMR (400 MHz, CDCl<sub>3</sub>)** δ 7.90 – 7.78 (m, 2H), 7.77 (dd, *J* = 8.0, 1.9 Hz, 1H), 7.48 – 7.40 (m, 2H), 7.10 – 7.01 (m, 2H). **<sup>13</sup>C NMR (101 MHz, CDCl<sub>3</sub>)** δ 161.9, 161.6, 157.9, 154.8, 141.9, 135.1, 132.7, 132.4, 130.3, 126.6, 125.4, 124.5, 117.5, 117.2, 116.6. **HRMS *m/z* (ESI):** calcd for C<sub>14</sub>H<sub>7</sub>BrClNO<sub>3</sub>, [M+H]<sup>+</sup> 351.9371; found to be, 351.9365.

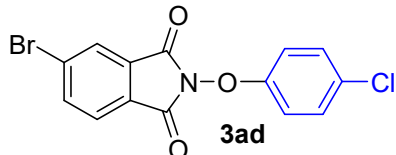

### 5-bromo-2-(4-chlorophenoxy)isoindoline-1,3-dione

**3ad** was synthesized according to the above mentioned general experimental procedure in section 7. White solid (72 mg, 68% yield).

**<sup>1</sup>H NMR (400 MHz, CDCl<sub>3</sub>)** δ 8.04 (dd, *J* = 1.8, 0.5 Hz, 1H), 7.95 (dd, *J* = 8.0, 1.7 Hz, 1H), 7.77 (dd, *J* = 7.9, 0.5 Hz, 1H), 7.34 – 7.25 (m, 2H), 7.16 – 7.07 (m, 2H). **<sup>13</sup>C NMR (101 MHz, CDCl<sub>3</sub>)** δ 162.0, 161.5, 157.3, 138.0, 130.2, 130.1, 130.1, 129.7, 127.4, 127.1, 125.4, 116.4. **HRMS *m/z* (ESI):** calcd for C<sub>14</sub>H<sub>7</sub>BrClNO<sub>3</sub>, [M+H]<sup>+</sup> 351.9371; found to be, 351.9365.

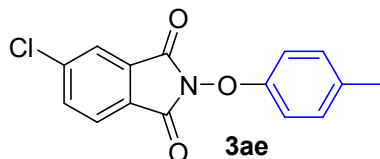

### 5-chloro-2-(p-tolyloxy)isoindoline-1,3-dione

**3ae** was synthesized according to the above mentioned general experimental procedure in section 7. White solid (66.5 mg, 77% yield).

**<sup>1</sup>H NMR (400 MHz, CDCl<sub>3</sub>)** δ 7.89 – 7.80 (m, 2H), 7.75 (dd, *J* = 8.0, 1.8 Hz, 1H), 7.16 – 7.03 (m, 4H), 2.30 (s, 3H). **<sup>13</sup>C NMR (101 MHz, CDCl<sub>3</sub>)** δ 162.1, 161.8, 156.8, 141.6, 134.8, 134.6, 130.4, 130.1, 126.8, 125.2, 124.4, 124.3, 114.9, 20.6, 20.6. **HRMS *m/z* (ESI):** calcd for C<sub>15</sub>H<sub>10</sub>ClNO<sub>3</sub>, [M+H]<sup>+</sup> 288.0422; found to be, 288.0415.

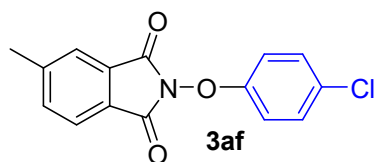

### 2-(4-chlorophenoxy)-5-methylisoindoline-1,3-dione

**3af** was synthesized according to the above mentioned general experimental procedure in section 7. White solid (75 mg, 87% yield).

**<sup>1</sup>H NMR (400 MHz, CDCl<sub>3</sub>)** δ 7.79 (d, *J* = 7.7 Hz, 1H), 7.71 (dt, *J* = 1.5, 0.8 Hz, 1H), 7.60 (ddd, *J* = 7.6, 1.6, 0.8 Hz, 1H), 7.26 (t, *J* = 8.1 Hz, 1H), 7.17 – 7.08 (m, 2H), 7.05 (ddd, *J* = 8.4, 2.5, 1.0 Hz, 1H), 2.54 (s, 3H). **<sup>13</sup>C NMR (101 MHz, CDCl<sub>3</sub>)** δ 163.1, 162.9, 157.5, 146.6, 135.5, 129.7, 129.6, 129.0, 126.0, 124.6, 124.0, 116.1, 22.2. **HRMS m/z (ESI):** calcd for C<sub>15</sub>H<sub>10</sub>ClNO<sub>3</sub>, [M+H]<sup>+</sup> 288.0422; found to be, 288.0415.

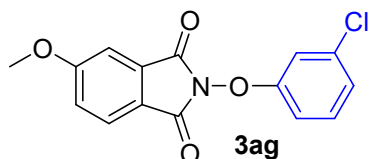

### 2-(3-chlorophenoxy)-5-methoxyisoindoline-1,3-dione

**3ag** was synthesized according to the above mentioned general experimental procedure in section 7. White solid (67.5 mg, 74% yield).

**<sup>1</sup>H NMR (400 MHz, CDCl<sub>3</sub>)** δ 7.82 (dd, *J* = 8.4, 0.8 Hz, 1H), 7.38 (dd, *J* = 2.4, 0.9 Hz, 1H), 7.30 – 7.19 (m, 2H), 7.17 – 7.11 (m, 1H), 7.08 (ddd, *J* = 20.8, 8.3, 2.5, 1.0 Hz, 2H), 3.94 (d, *J* = 1.0 Hz, 3H). **<sup>13</sup>C NMR (101 MHz, CDCl<sub>3</sub>)** δ 165.4, 162.9, 162.7, 159.5, 135.2, 131.3, 130.5, 126.1, 124.7, 120.6, 120.3, 114.8, 112.6, 109.1, 56.2, 56.2. **HRMS m/z (ESI):** calcd for C<sub>15</sub>H<sub>10</sub>ClNO<sub>4</sub>, [M+H]<sup>+</sup> 303.0298; found to be, 303.0295.

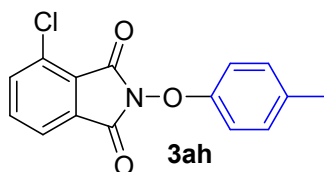

### 4-chloro-2-(p-tolyloxy)isoindoline-1,3-dione

**3ah** was synthesized according to the above mentioned general experimental procedure in section 7. White solid (60 mg, 69% yield).

**<sup>1</sup>H NMR (400 MHz, CDCl<sub>3</sub>)** δ 7.81 (dd, *J* = 4.6, 3.7 Hz, 1H), 7.77 – 7.64 (m, 2H), 7.16 – 7.06 (m, 4H), 2.30 (s, 3H). **<sup>13</sup>C NMR (101 MHz, CDCl<sub>3</sub>)** δ 161.6, 160.7, 156.8, 136.5, 135.6, 134.7, 132.1, 130.8, 130.1, 124.7, 122.3, 115.3, 20.6. **HRMS m/z (ESI):** calcd for C<sub>15</sub>H<sub>10</sub>ClNO<sub>3</sub>, [M+ H]<sup>+</sup> 288.0422; found to be, 288.0413.

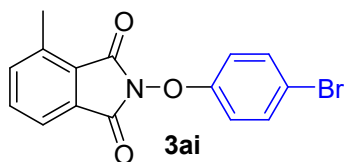

### 2-(4-bromophenoxy)-4-methylisoindoline-1,3-dione

**3ai** was synthesized according to the above mentioned general experimental procedure in section 7. White solid (77.5 mg, 78% yield).

**<sup>1</sup>H NMR (400 MHz, CDCl<sub>3</sub>)** δ 7.75 – 7.60 (m, 2H), 7.55 (m, 1H), 7.50 – 7.38 (m, 2H), 7.11 – 7.02 (m, 2H), 2.68 (d, *J* = 6.7 Hz, 3H). **<sup>13</sup>C NMR (101 MHz, CDCl<sub>3</sub>)** δ 163.6, 162.9, 158.1, 139.0, 137.4, 134.5, 132.6, 129.1, 125.4, 121.7, 121.7, 117.1, 116.5, 17.7, 17.7. **HRMS m/z (ESI):** calcd for C<sub>15</sub>H<sub>10</sub>BrNO<sub>3</sub>, [M+ H]<sup>+</sup> 331.9917; found to be, 331.9911.

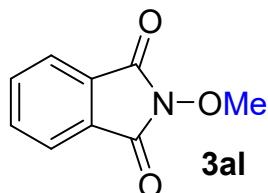

### 2-methoxyisoindoline-1,3-dione

**3al** was synthesized according to the above mentioned general experimental procedure in section 7. White solid (49.5 mg, 93% yield).

**<sup>1</sup>H NMR (400 MHz, CDCl<sub>3</sub>)** δ 7.85 – 7.67 (m, 4H), 4.09 – 3.99 (m, 3H). **<sup>13</sup>C NMR (101 MHz, CDCl<sub>3</sub>)** δ 163.3, 134.5, 128.8, 123.5, 65.8. All spectral data correspond to those given in the literature.<sup>[8]</sup>

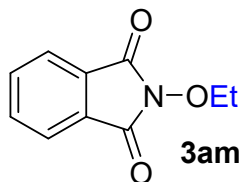

### 2-ethoxyisoindoline-1,3-dione

**3am** was synthesized according to the above mentioned general experimental procedure in section 7. White solid (44 mg, 83% yield).

**<sup>1</sup>H NMR (400 MHz, CDCl<sub>3</sub>)** δ 7.81 (td, *J* = 5.2, 3.4 Hz, 2H), 7.73 (qd, *J* = 5.2, 2.4 Hz, 2H), 4.25 (qd, *J* = 7.0, 1.4 Hz, 2H), 1.39 (td, *J* = 7.1, 1.4 Hz, 3H). **<sup>13</sup>C NMR (101 MHz, CDCl<sub>3</sub>)** δ 163.7, 134.4, 128.9, 123.5, 74.1, 13.6. All spectral data correspond to those given in the literature.<sup>[8]</sup>

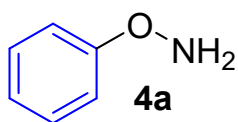

### O-phenylhydroxylamine

**4a** was synthesized according to the following general experimental procedure: To a solution of **3a** (0.25 mmol, 60 mg) in 2.5 mL  $\text{CHCl}_3$  under stirring conditions,  $\text{NH}_3$  (1.0 mL, 7N in methanol) was added dropwise at room temperature. Stirring was continued for 12 h and then concentrated under reduced pressure. After that the crude reaction mixture was adsorbed to silica and transfer to a plug of silica gel, washing with 20%  $\text{Et}_2\text{O}$  in pentane (100 mL). Removal of solvent under reduced pressure afforded yellowish oil **4a** in 91% yield.

**$^1\text{H}$  NMR (400 MHz, Chloroform-*d*)**  $\delta$  7.44 – 7.33 (m, 2H), 7.00 (q,  $J$  = 7.5 Hz, 1H), 6.87 (dd,  $J$  = 8.5, 4.8 Hz, 2H), 3.77 (s, 2H).  **$^{13}\text{C}$  NMR (101 MHz, Chloroform-*d*)**  $\delta$  155.2, 129.9, 121.1, 115.5. All spectral data correspond to those given in the literature.<sup>[6]</sup>

S21

13. Copies of  $^1\text{H}$  NMR,  $^{13}\text{C}$  NMR,  $^{19}\text{F}$  NMR and  $^{31}\text{P}$  NMR Spectra.

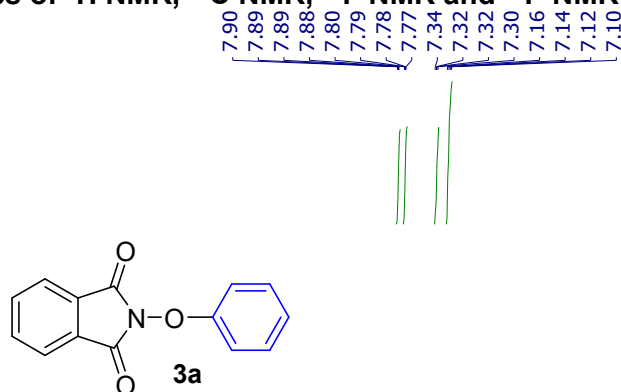

$^1\text{H}$  NMR, CDCl<sub>3</sub>, 400 MHz

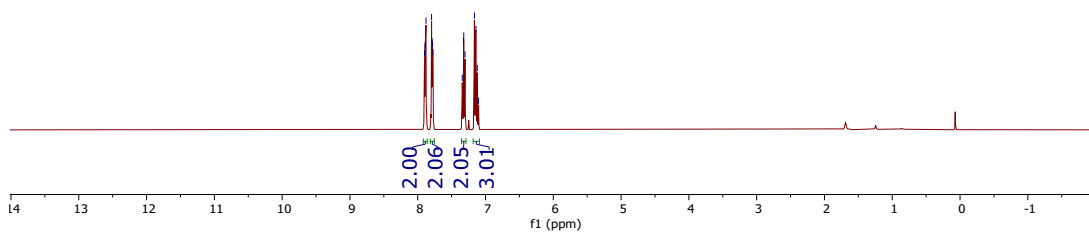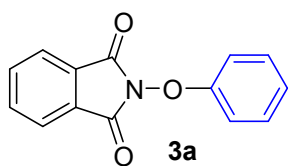

$^{13}\text{C}$  NMR, CDCl<sub>3</sub>, 101 MHz

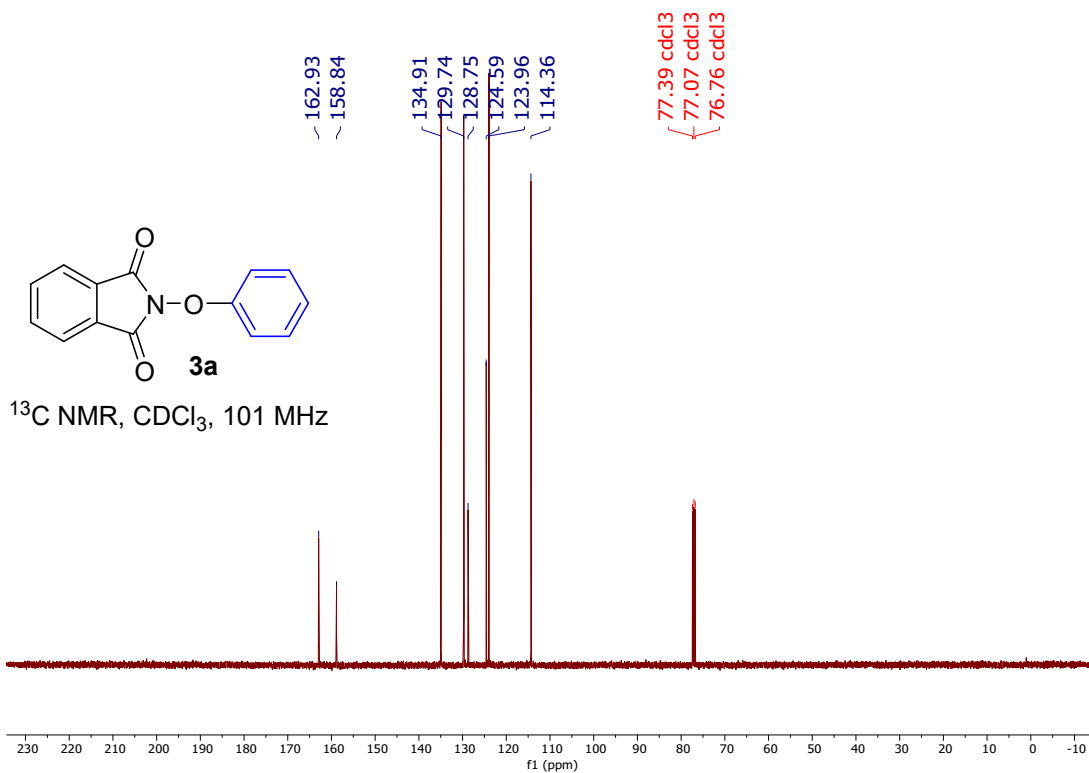

S22

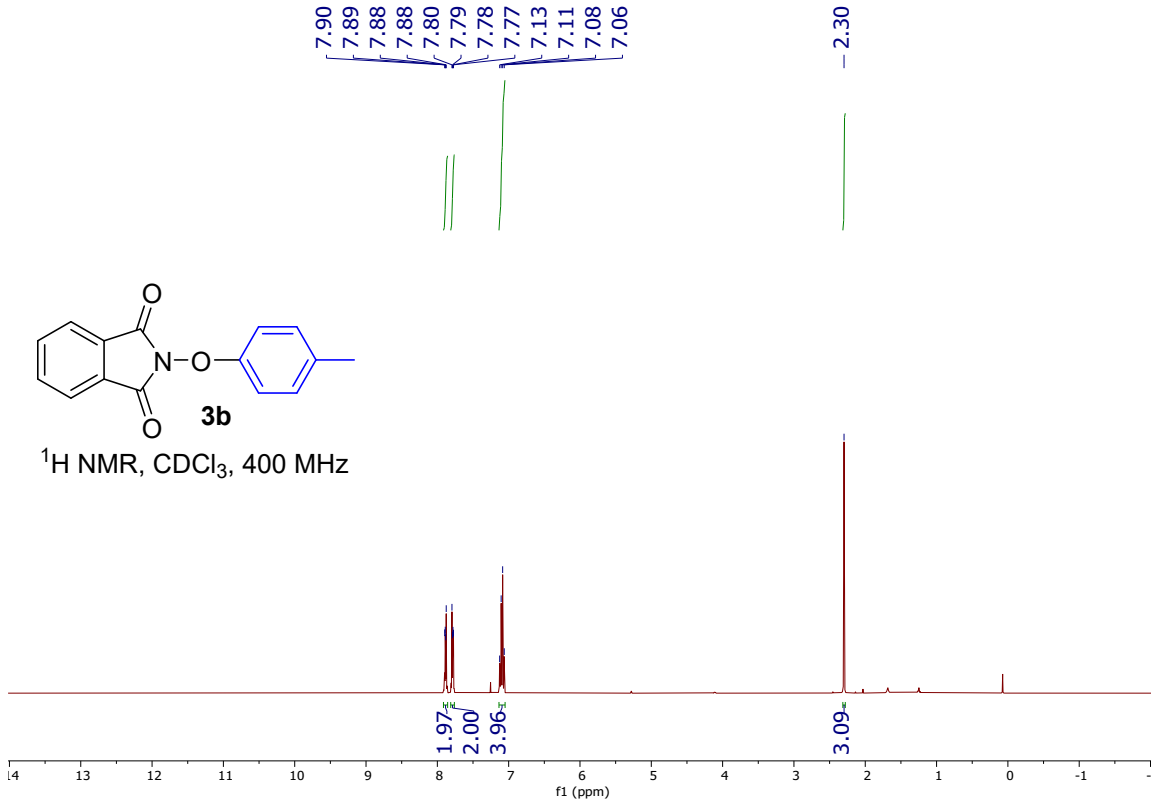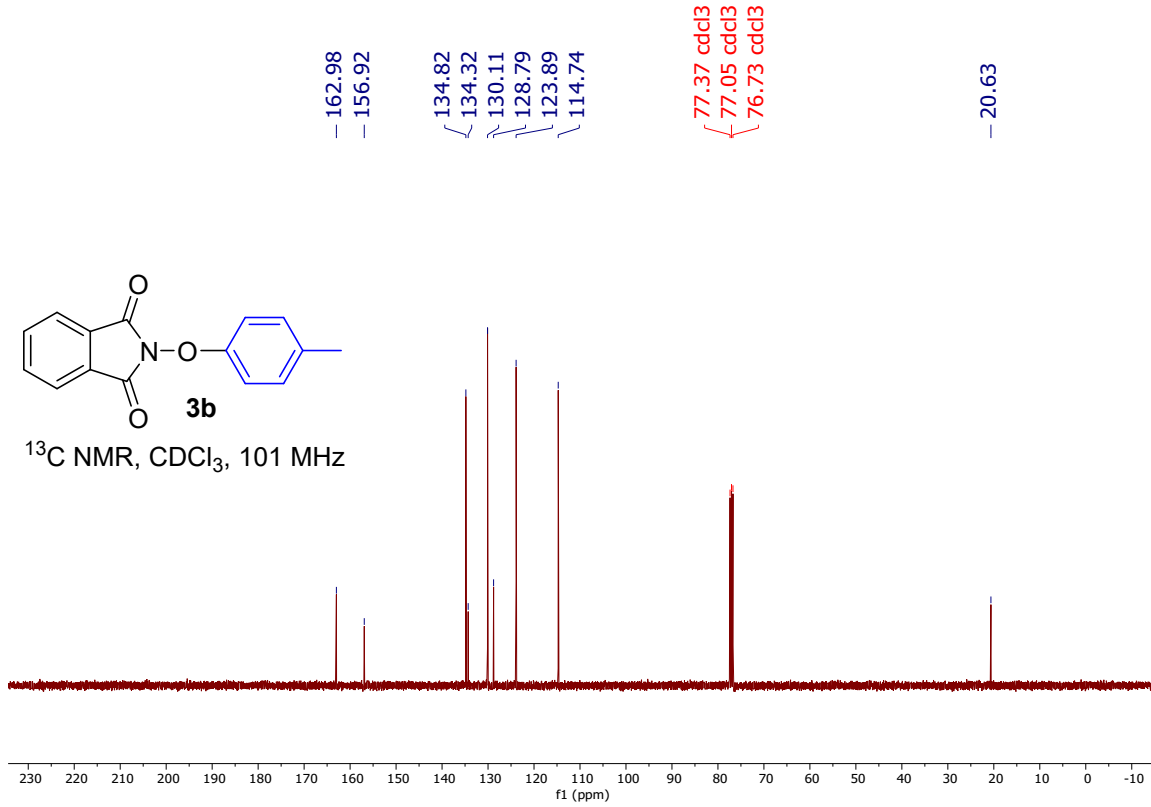



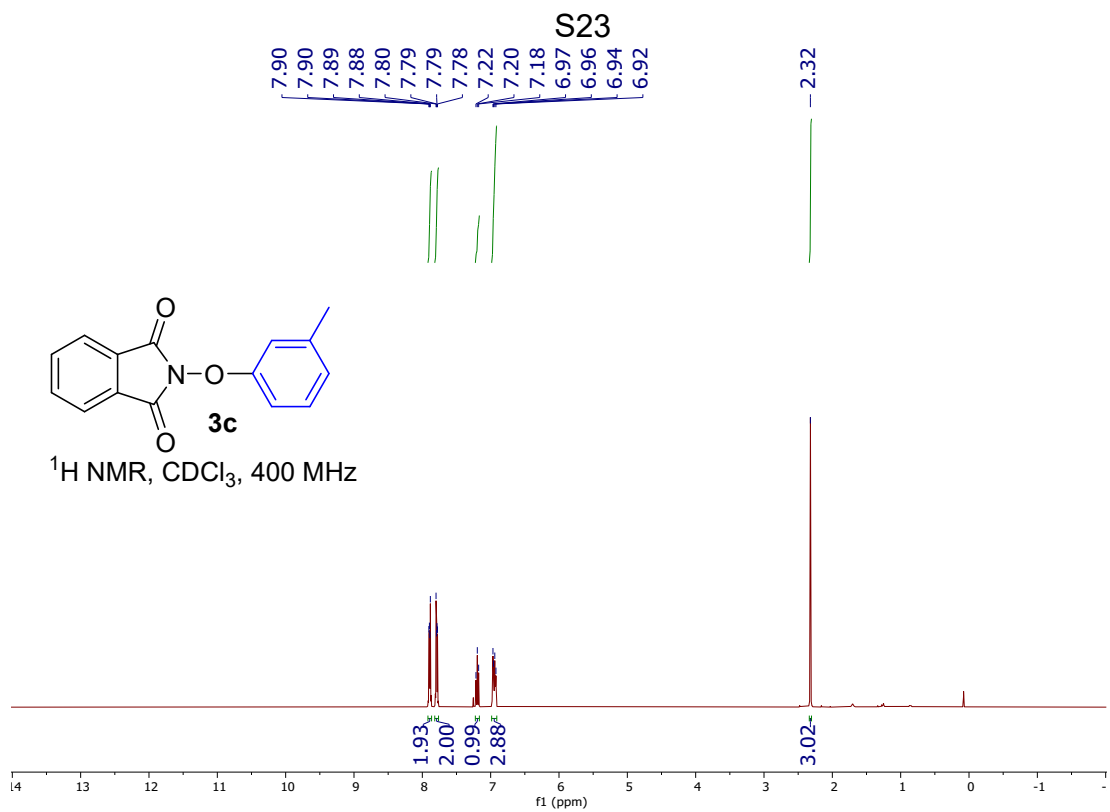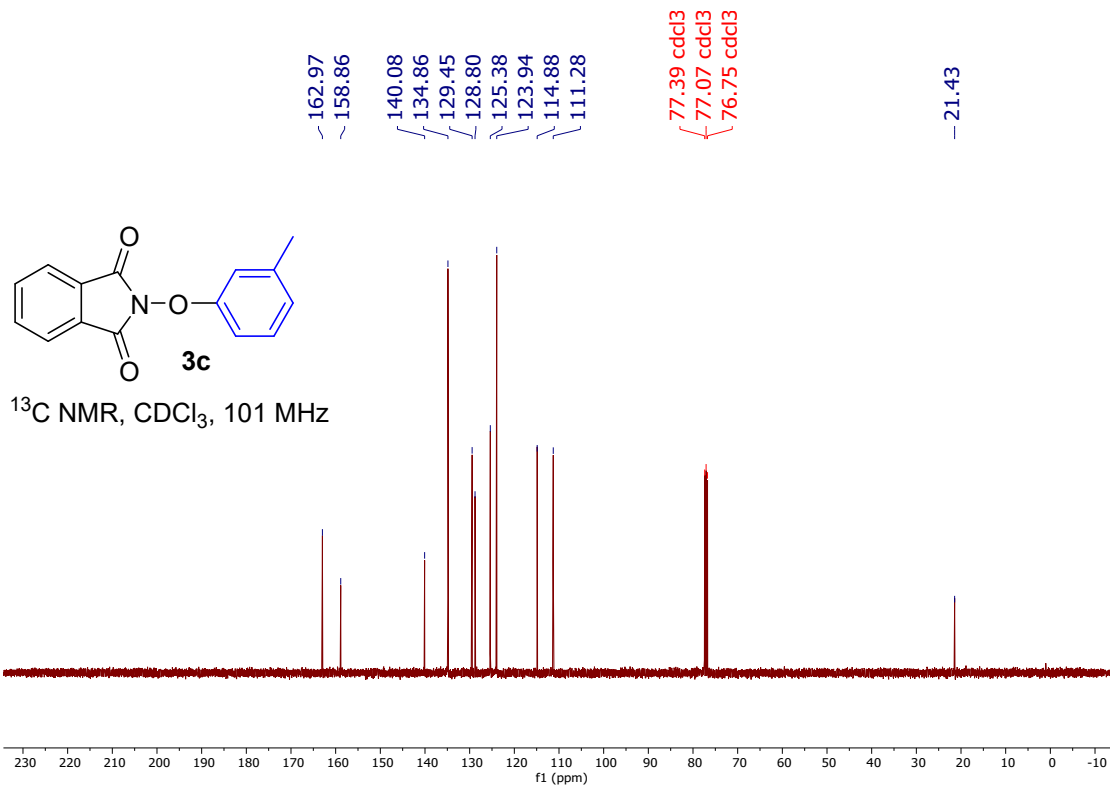

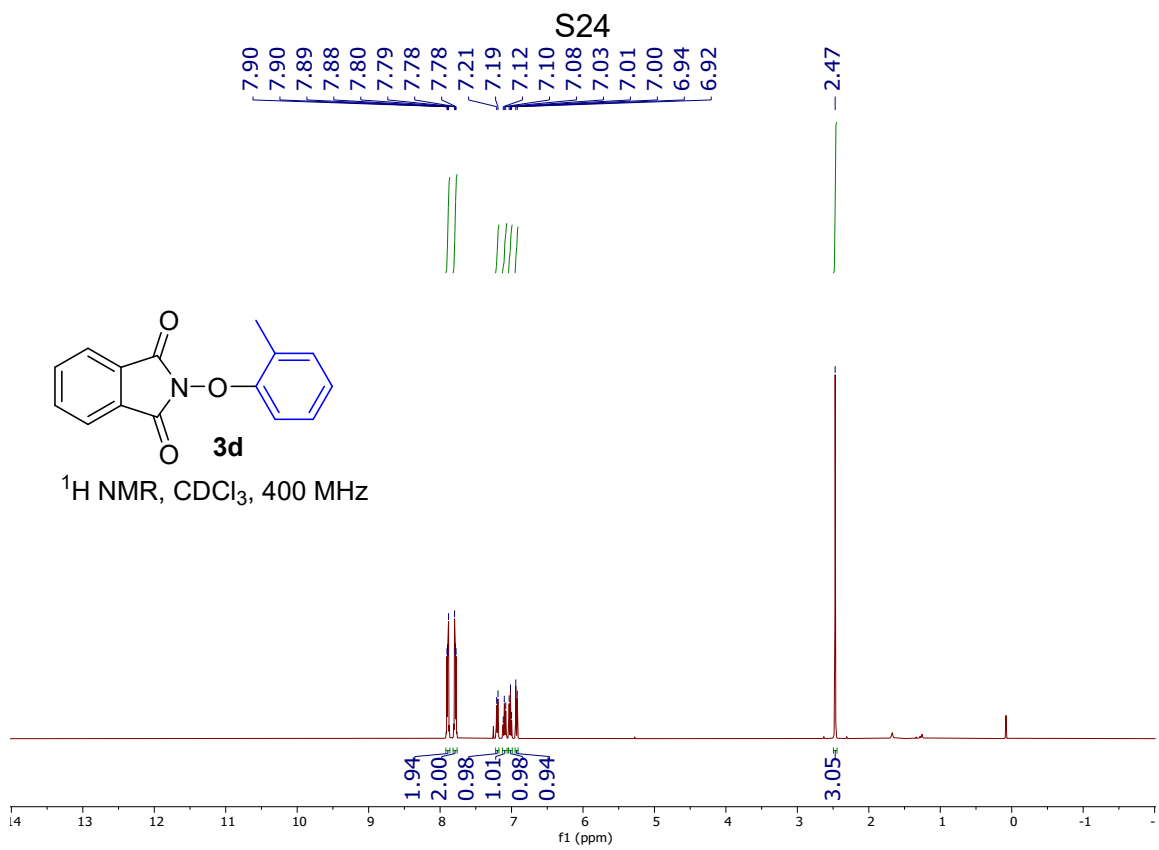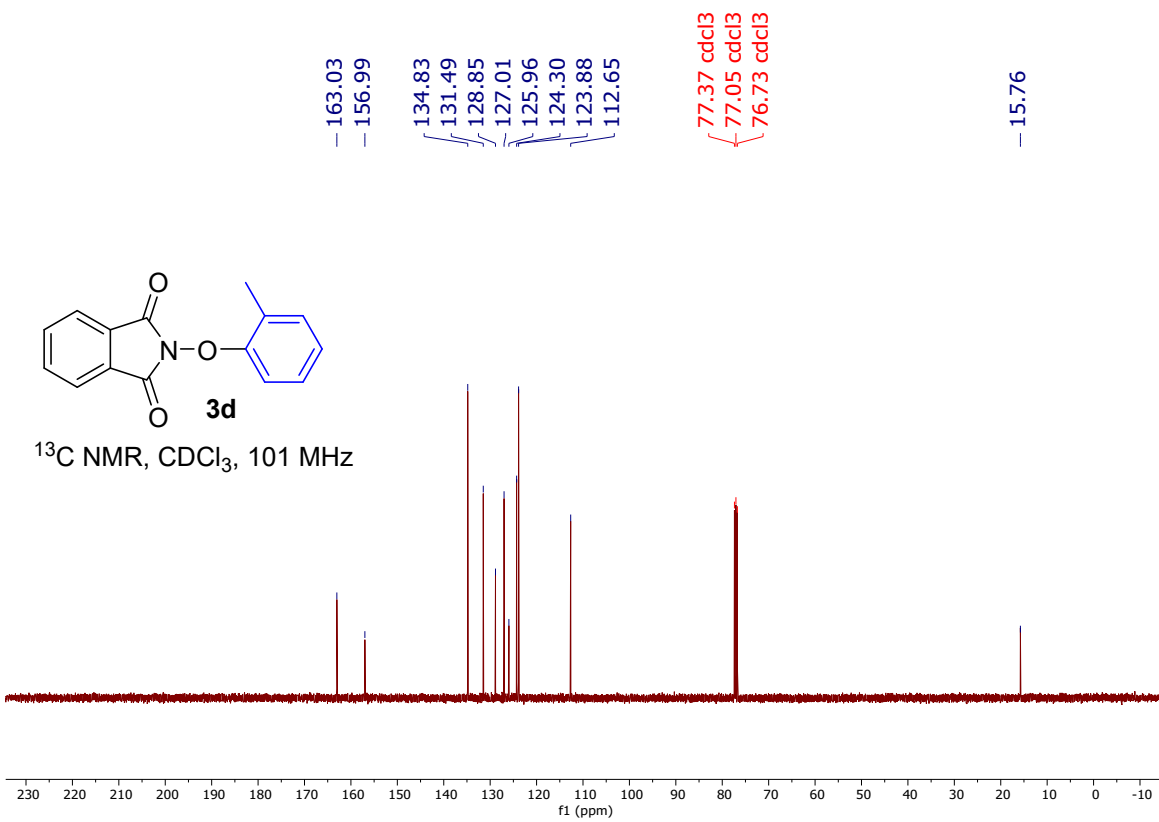

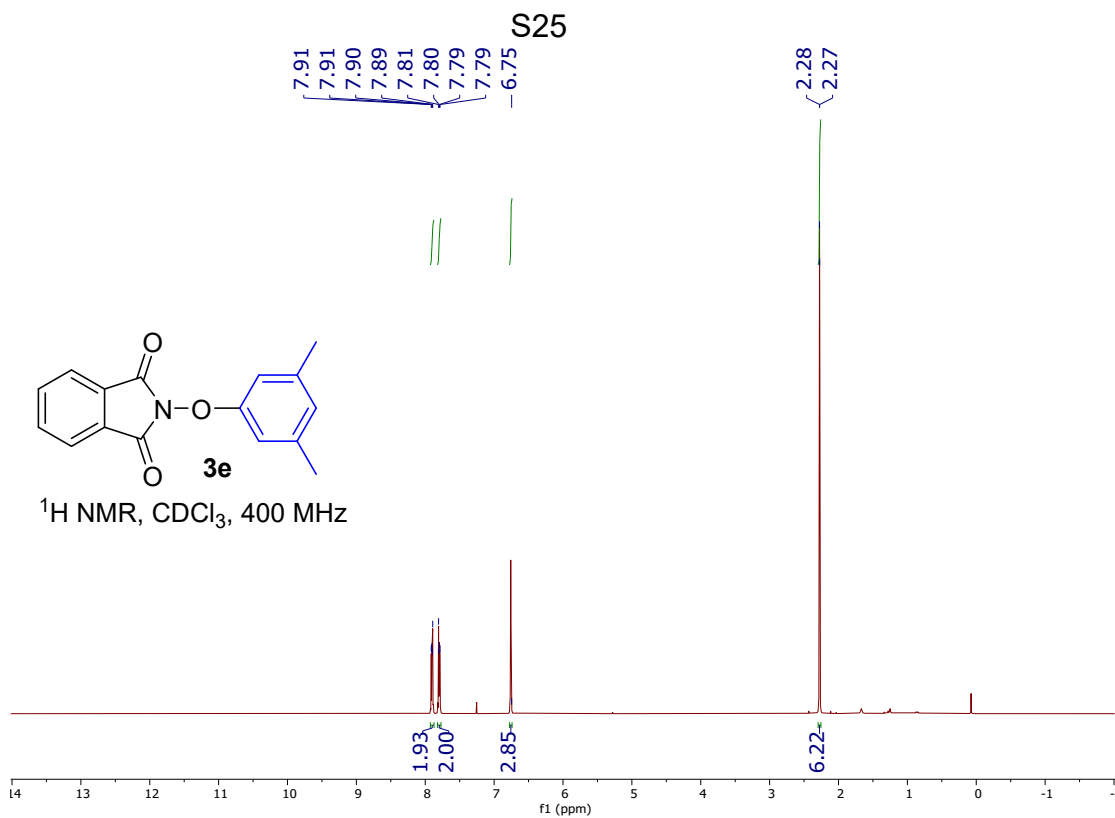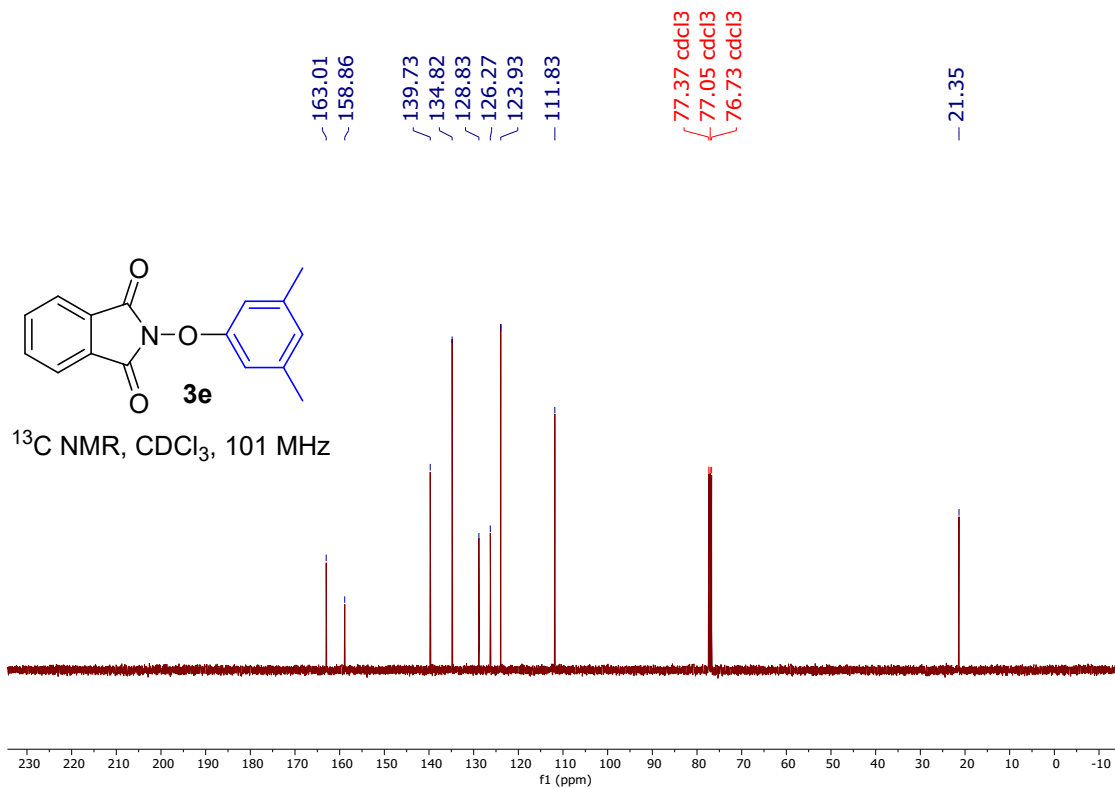

S26

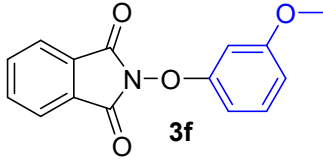

<sup>1</sup>H NMR, CDCl<sub>3</sub>, 400 MHz

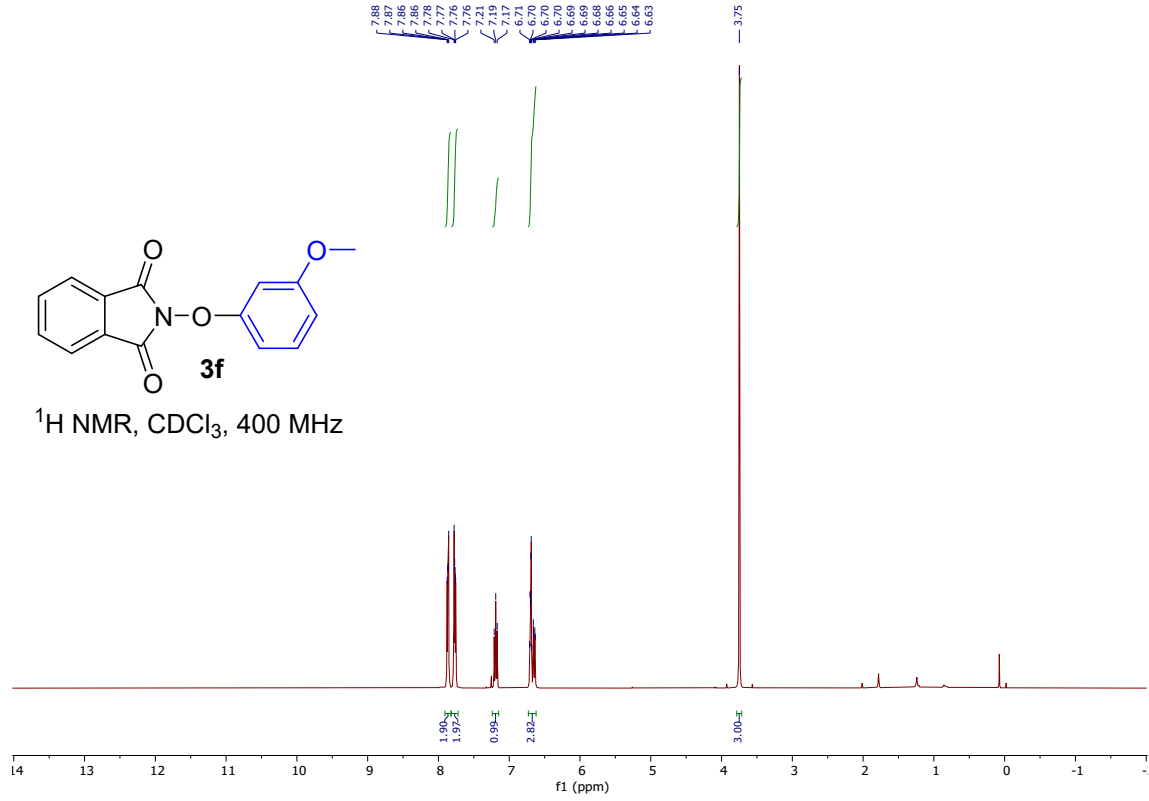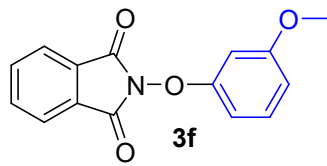

<sup>13</sup>C NMR, CDCl<sub>3</sub>, 101 MHz

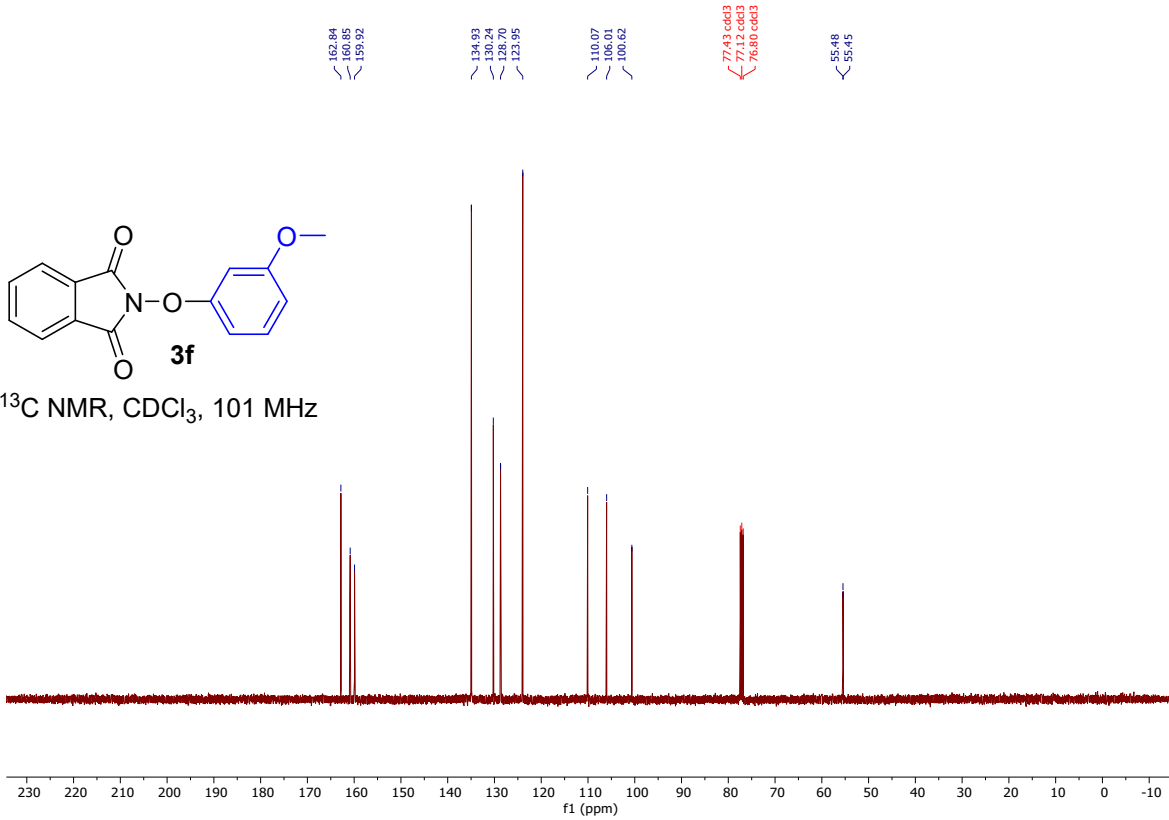

S27

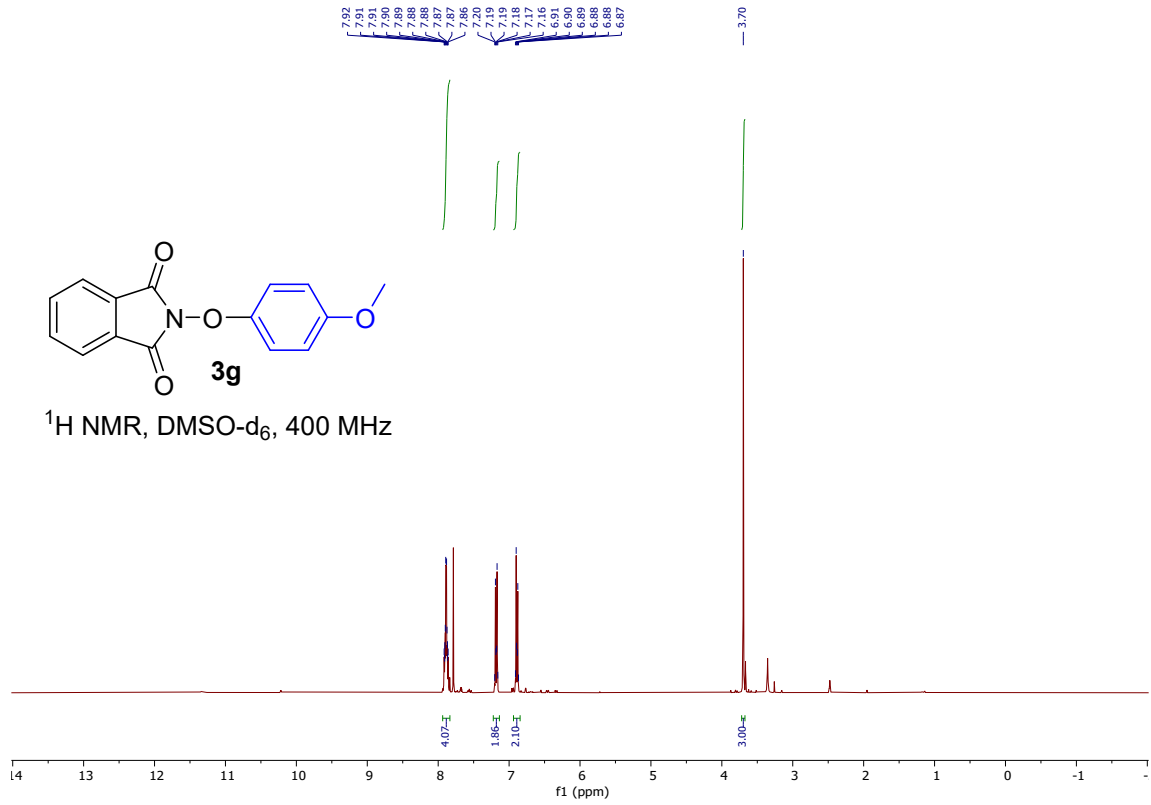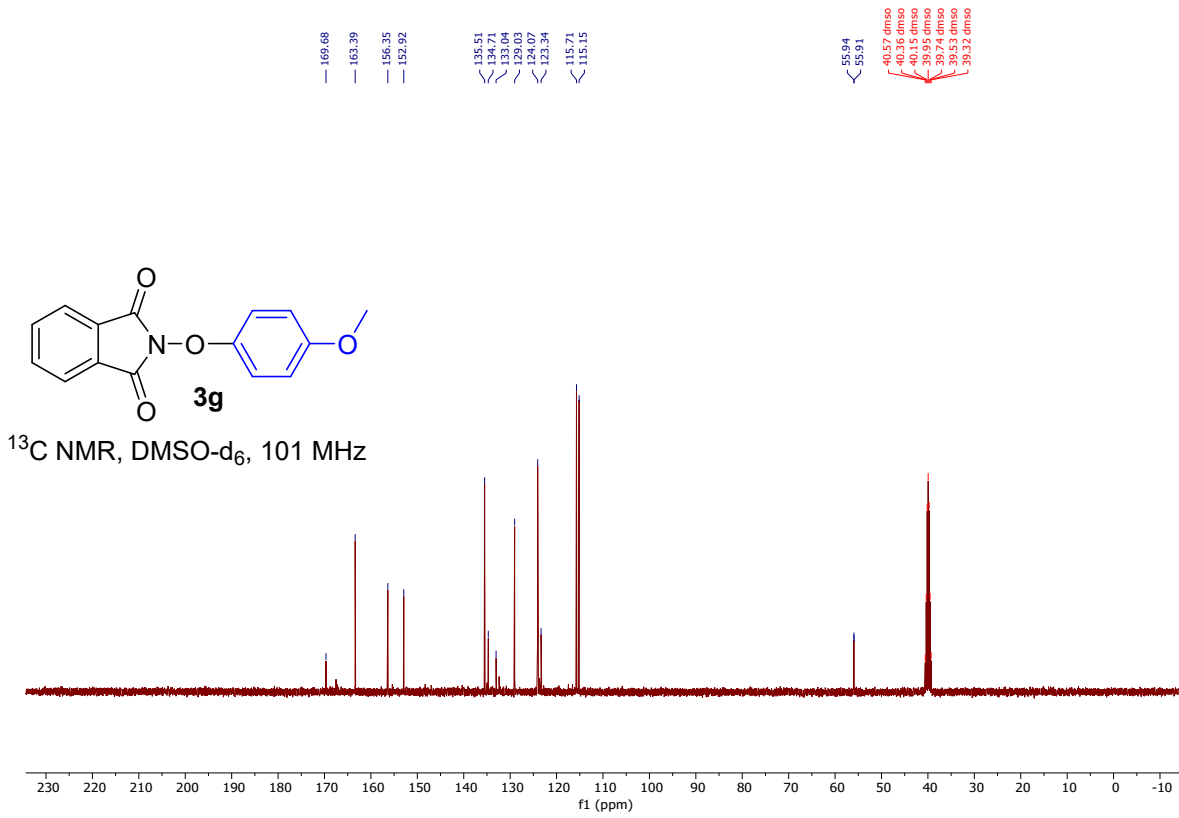

S28

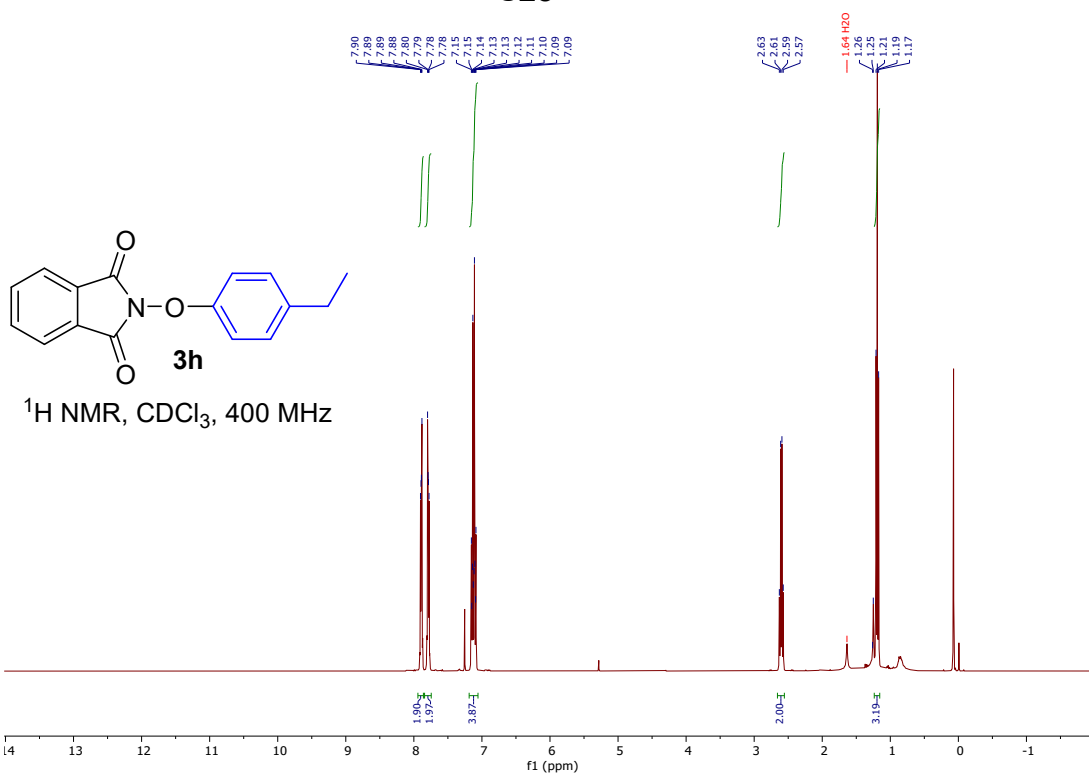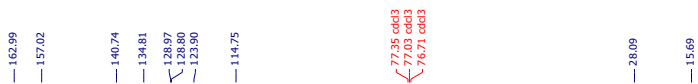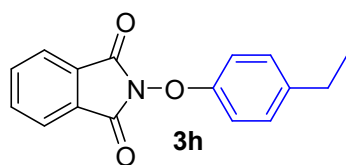

<sup>13</sup>C NMR, CDCl<sub>3</sub>, 101 MHz

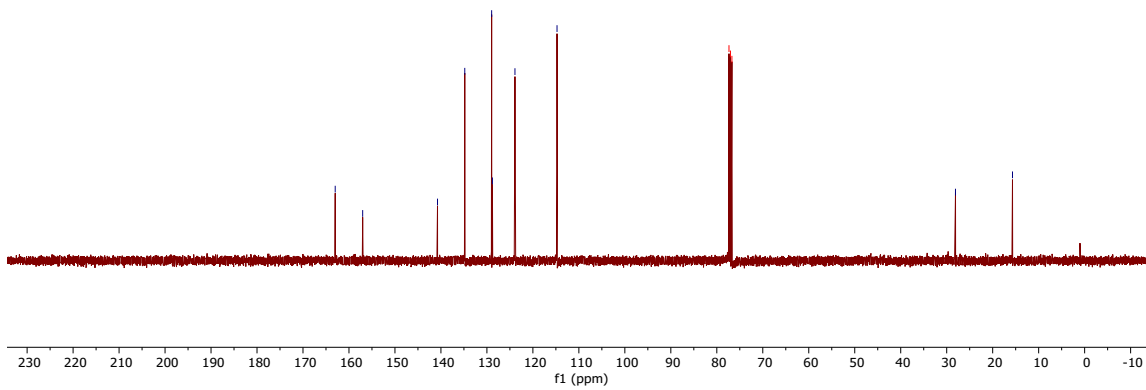

S29

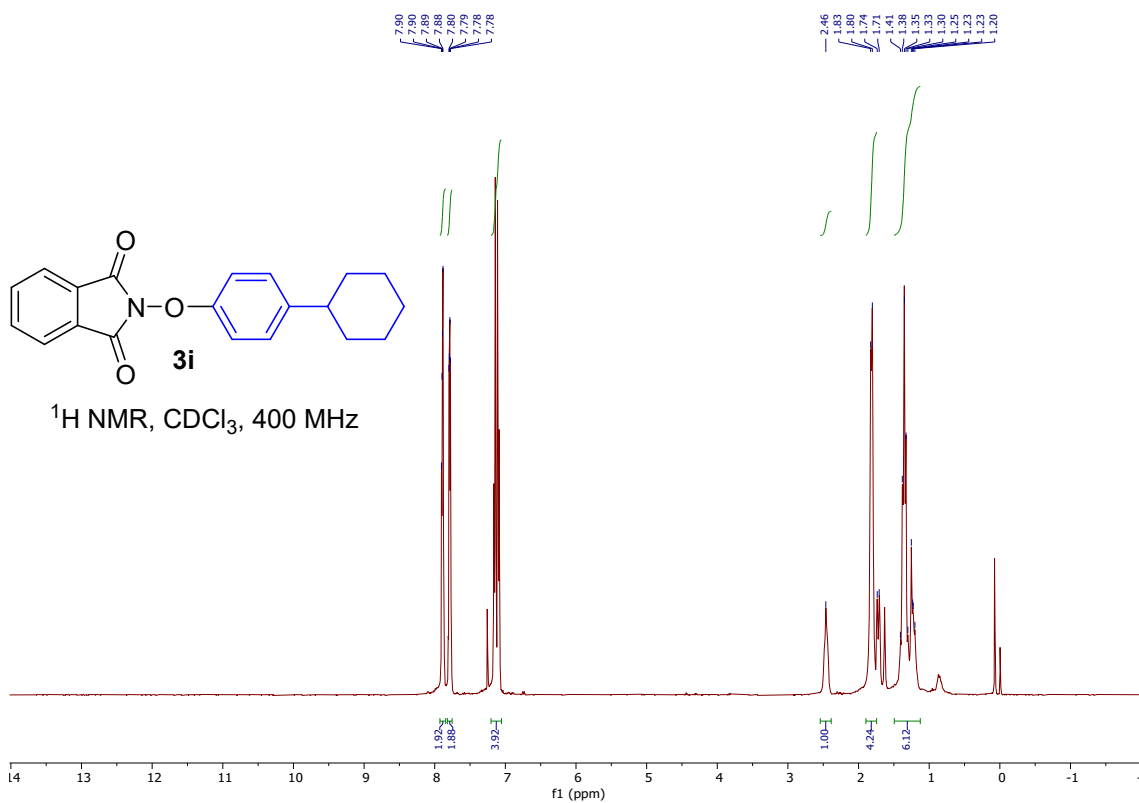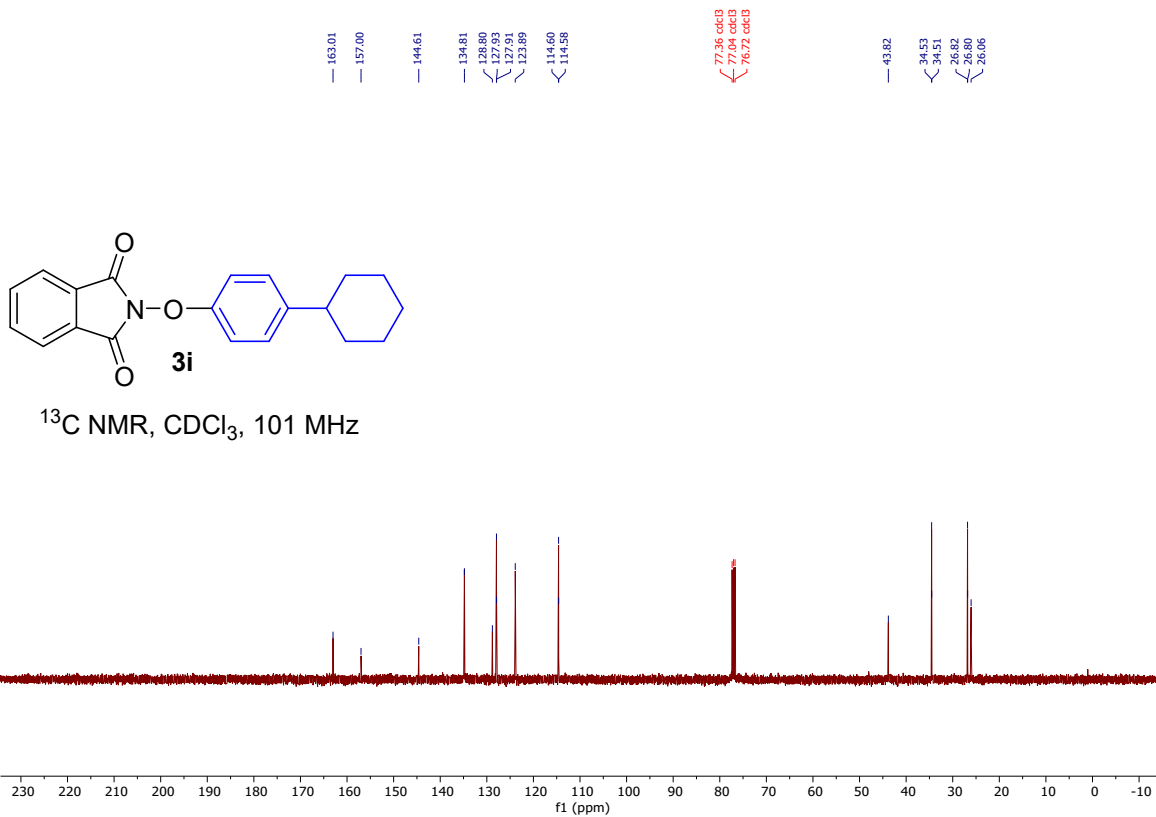

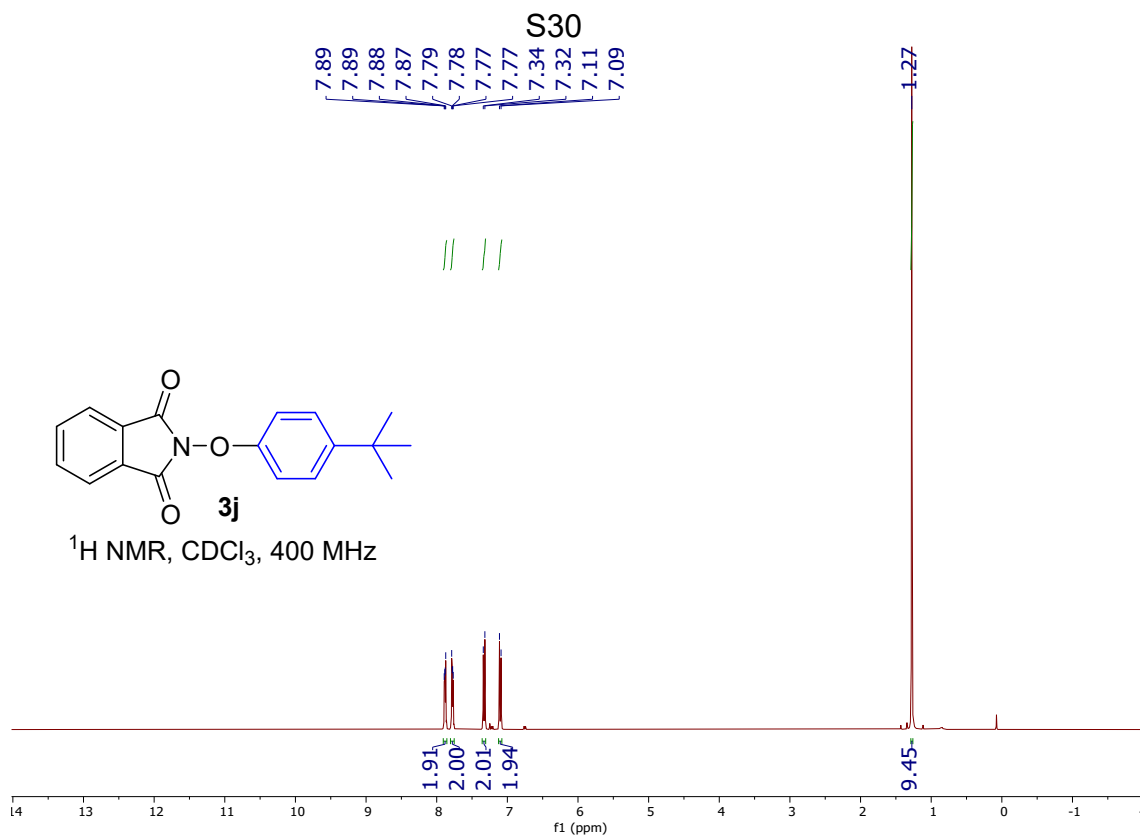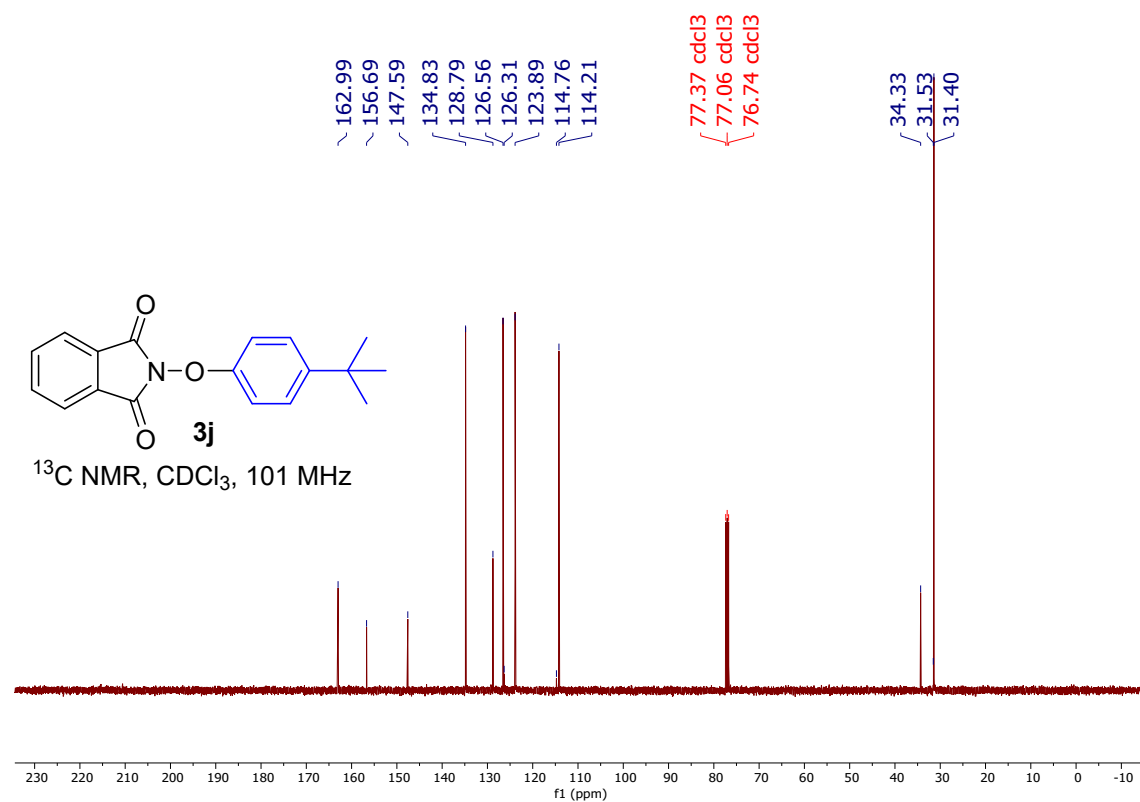



S31

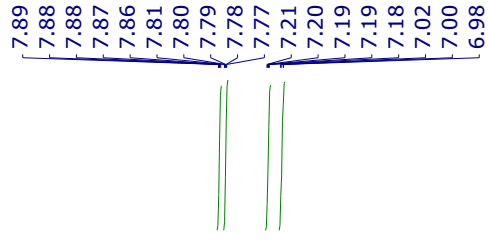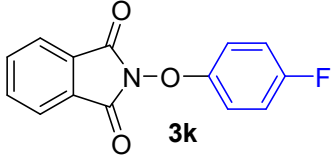

<sup>1</sup>H NMR, CDCl<sub>3</sub>, 400 MHz

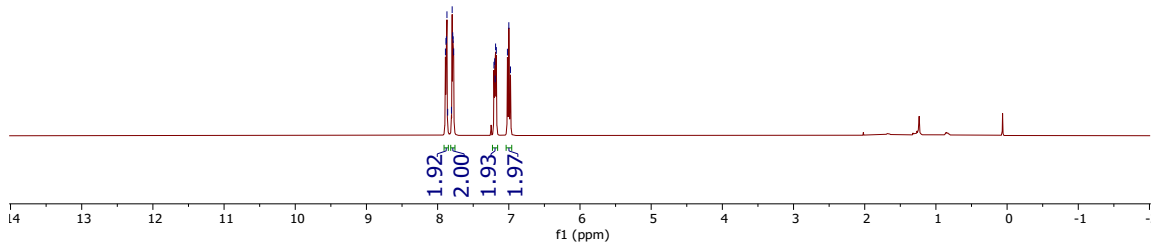

162.89  
160.81  
158.39  
154.93  
154.90  
134.94  
128.70  
123.98  
117.15  
117.06  
116.35  
116.12

77.35 cddCl3  
77.04 cddCl3  
76.72 cddCl3

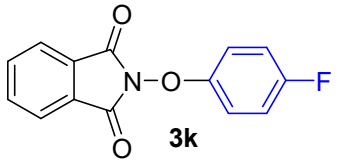

<sup>13</sup>C NMR, CDCl<sub>3</sub>, 101 MHz

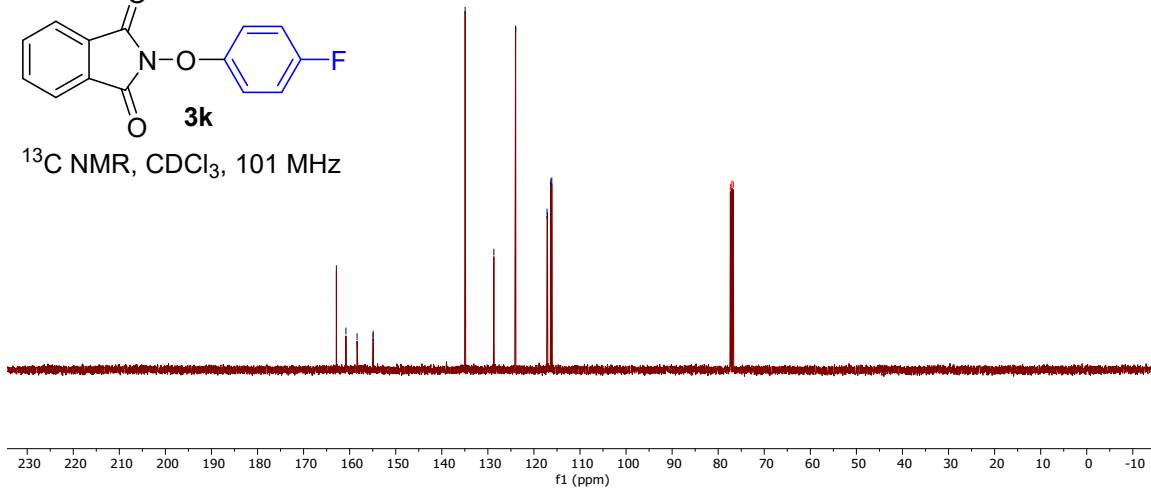

S32

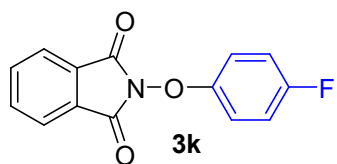

$^{19}\text{F}$  NMR,  $\text{CDCl}_3$ , 471 MHz

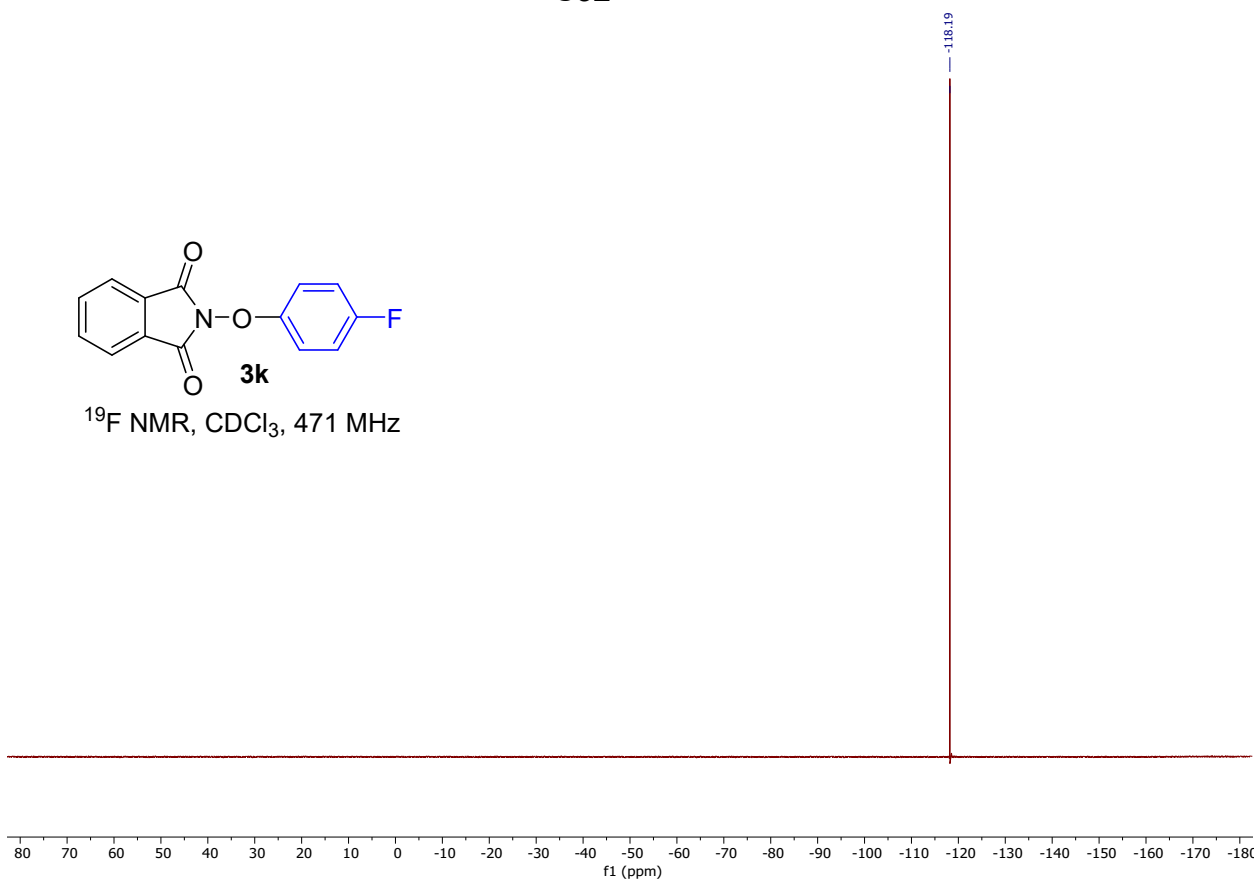

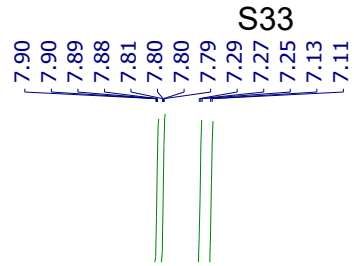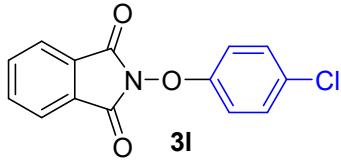

$^1\text{H NMR}$ ,  $\text{CDCl}_3$ , 400 MHz

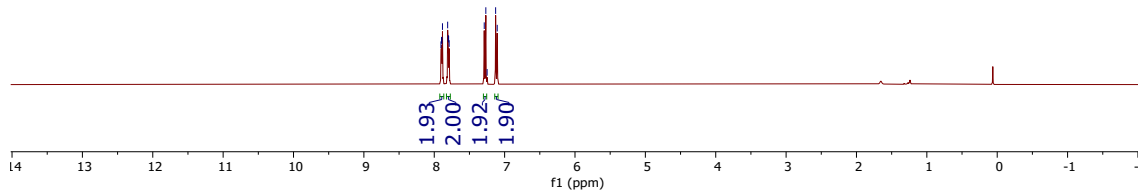

162.78  
157.46

135.01  
129.82  
129.67  
128.69  
124.05  
116.18

77.35 cdd13  
77.03 cdd13  
76.71 cdd13

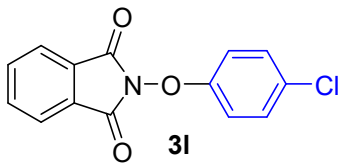

$^{13}\text{C NMR}$ ,  $\text{CDCl}_3$ , 101 MHz

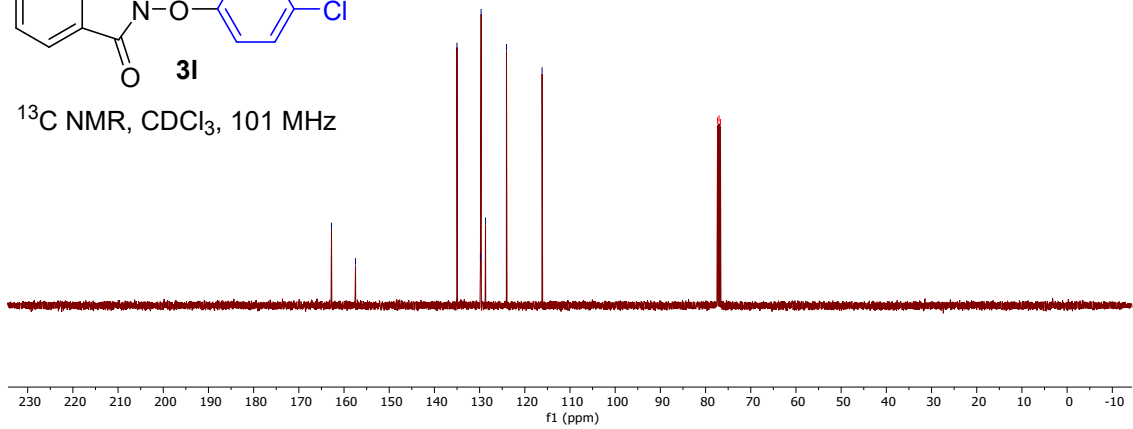

S34

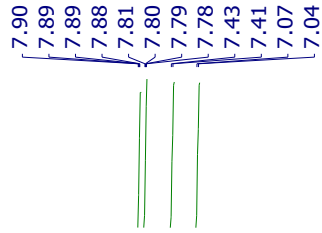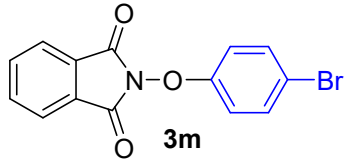

<sup>1</sup>H NMR, CDCl<sub>3</sub>, 400 MHz

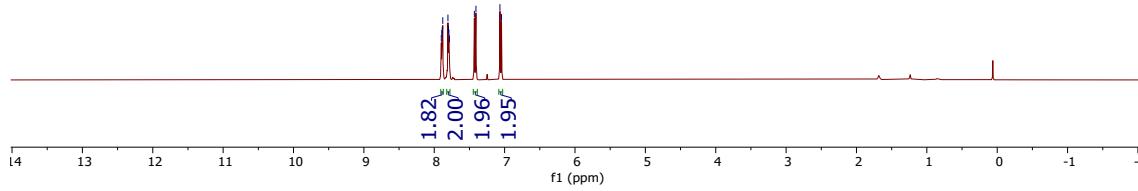

162.75  
158.01  
135.03  
132.63  
128.68  
124.06  
117.23  
116.48

77.37 cdd13  
77.05 cdd13  
76.73 cdd13

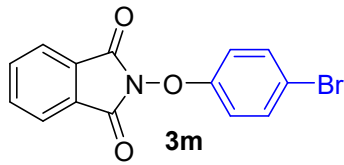

<sup>13</sup>C NMR, CDCl<sub>3</sub>, 101 MHz

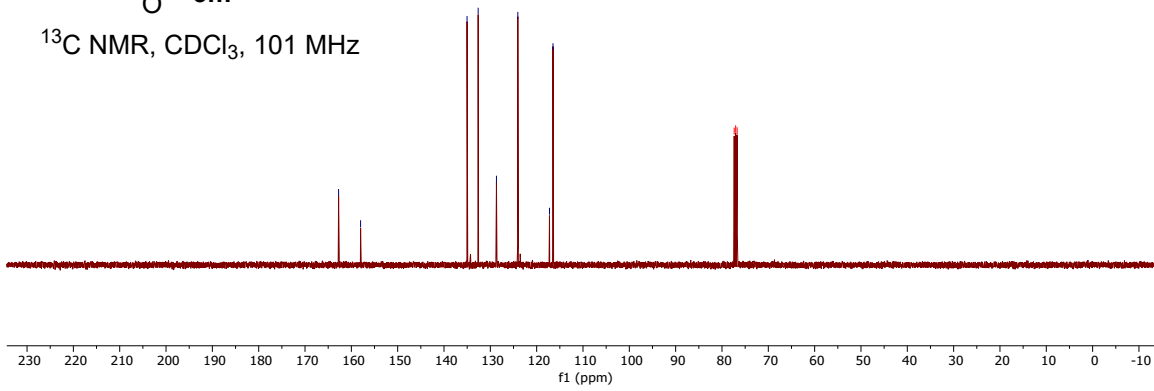

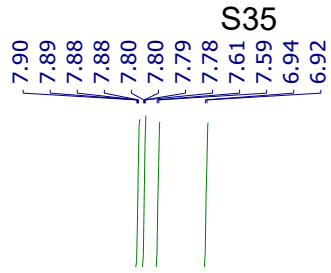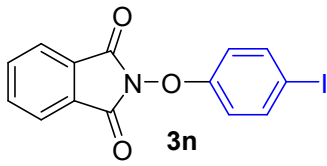

$^1\text{H}$  NMR,  $\text{CDCl}_3$ , 400 MHz

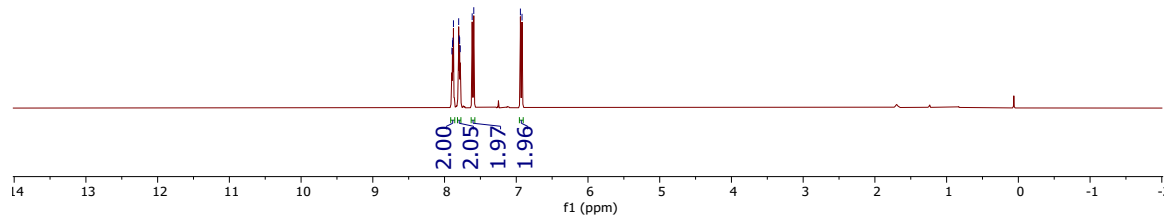

~162.73  
~158.87

~138.59  
~135.03  
~128.68  
~124.07  
~116.72

87.65  
77.38  $\text{cdCl}_3$   
77.06  $\text{cdCl}_3$   
76.74  $\text{cdCl}_3$

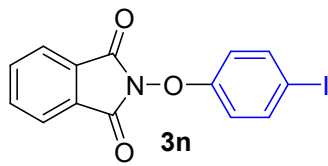

$^{13}\text{C}$  NMR,  $\text{CDCl}_3$ , 101 MHz

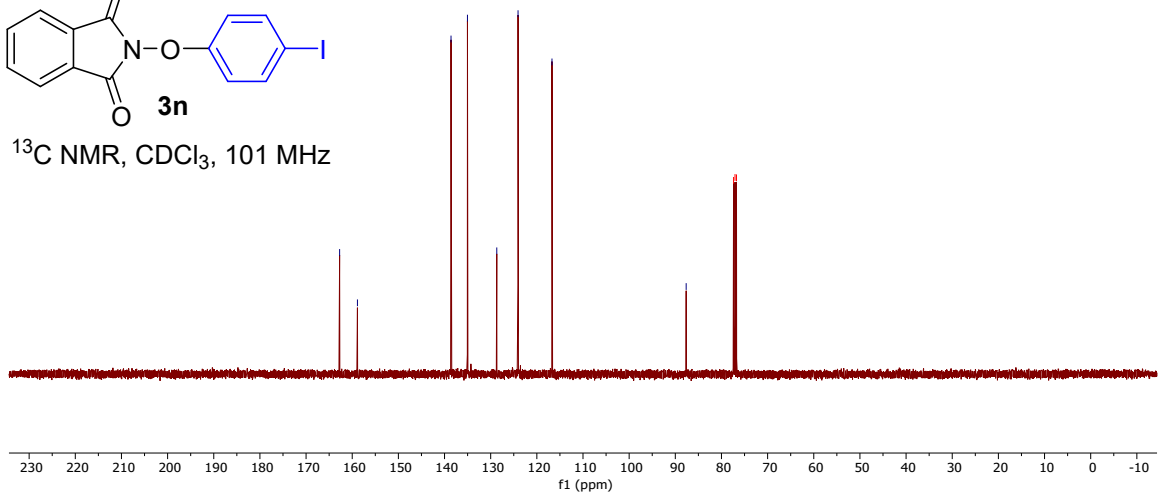

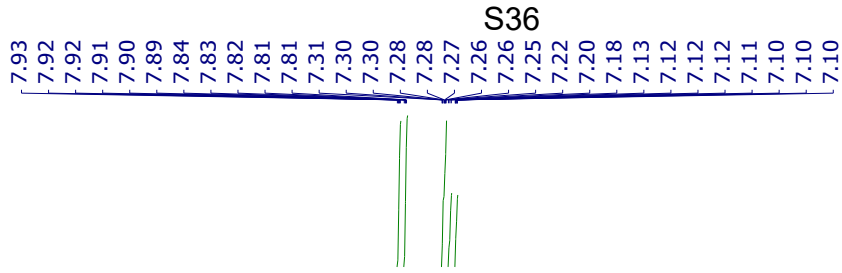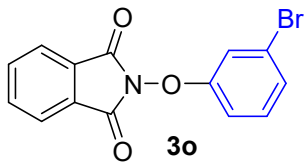

$^1\text{H NMR}$ ,  $\text{CDCl}_3$ , 400 MHz

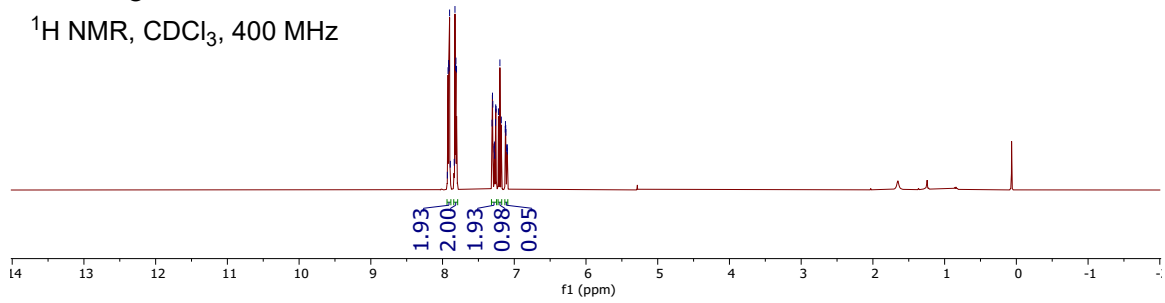

162.72  
159.33

135.06  
130.89  
128.71  
127.80  
124.12  
122.90  
117.74  
113.27

77.35 cdd13  
77.03 cdd13  
76.71 cdd13

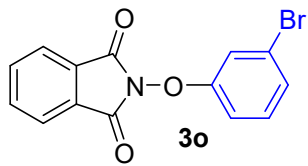

$^{13}\text{C NMR}$ ,  $\text{CDCl}_3$ , 101 MHz

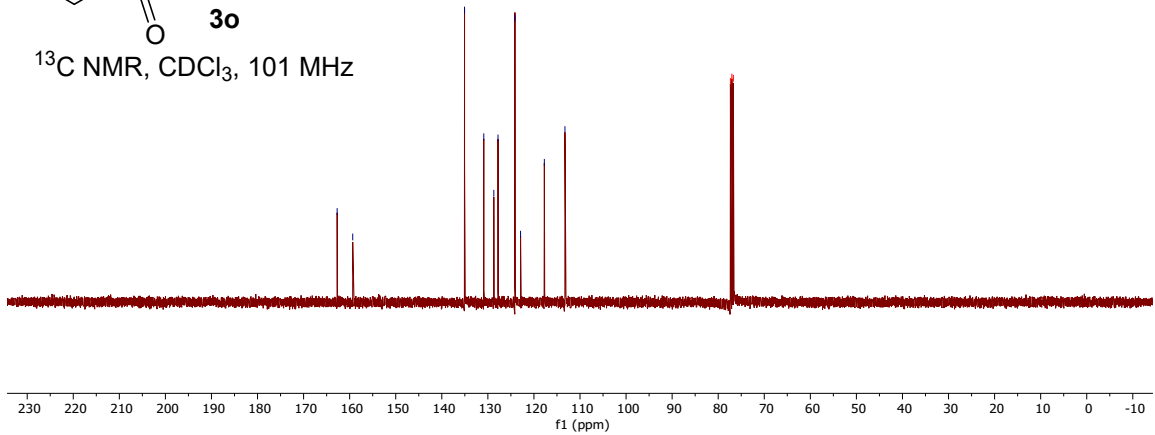

S37

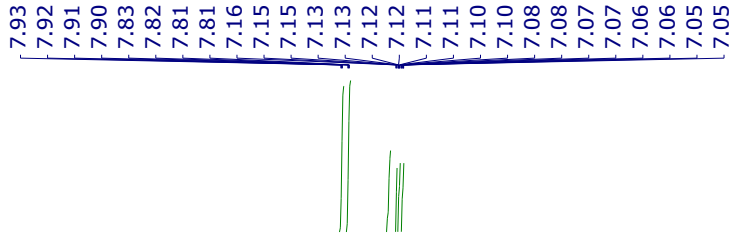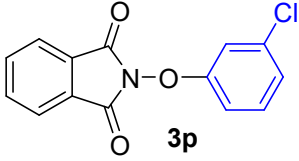

<sup>1</sup>H NMR, CDCl<sub>3</sub>, 400 MHz

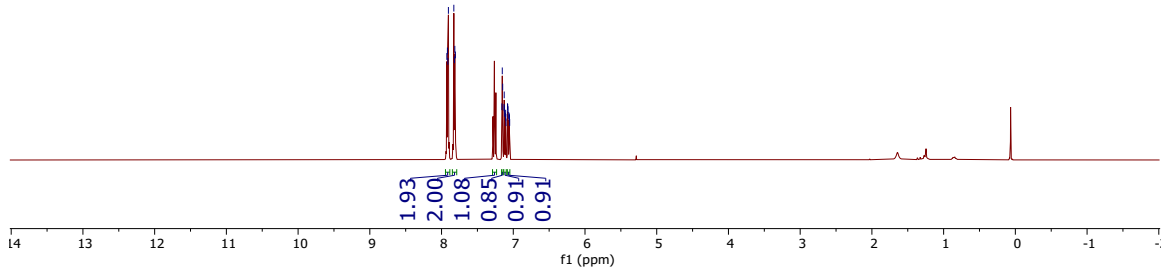

162.70  
159.35  
135.22  
135.05  
130.58  
128.71  
124.85  
124.11  
114.90  
112.74

77.33 cdd3  
77.02 cdd3  
76.70 cdd3

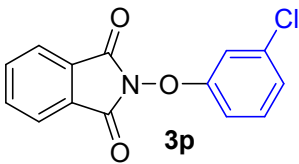

<sup>13</sup>C NMR, CDCl<sub>3</sub>, 101 MHz

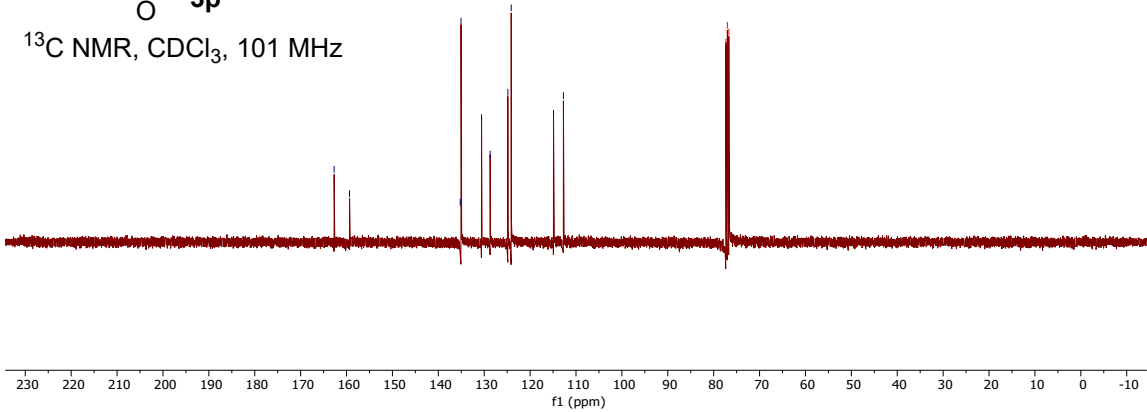

S38

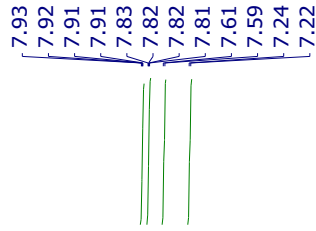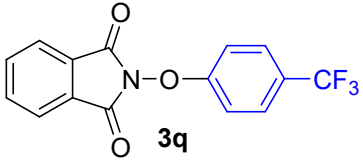

<sup>1</sup>H NMR, CDCl<sub>3</sub>, 400 MHz

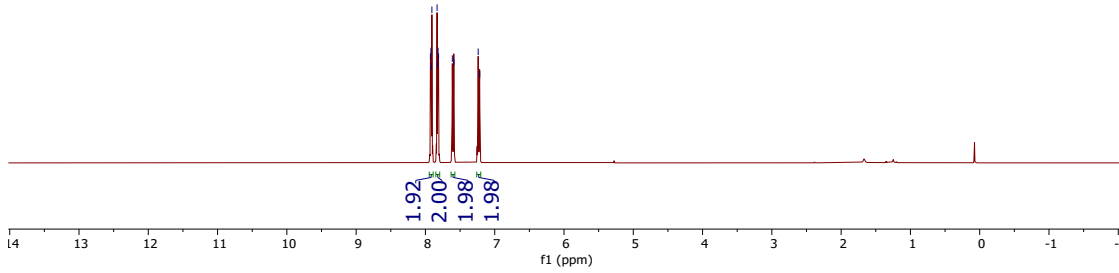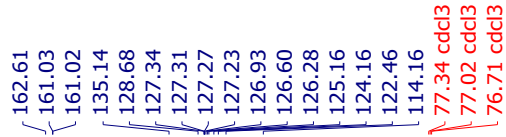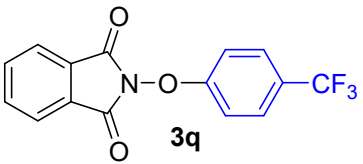

<sup>13</sup>C NMR, CDCl<sub>3</sub>, 101 MHz

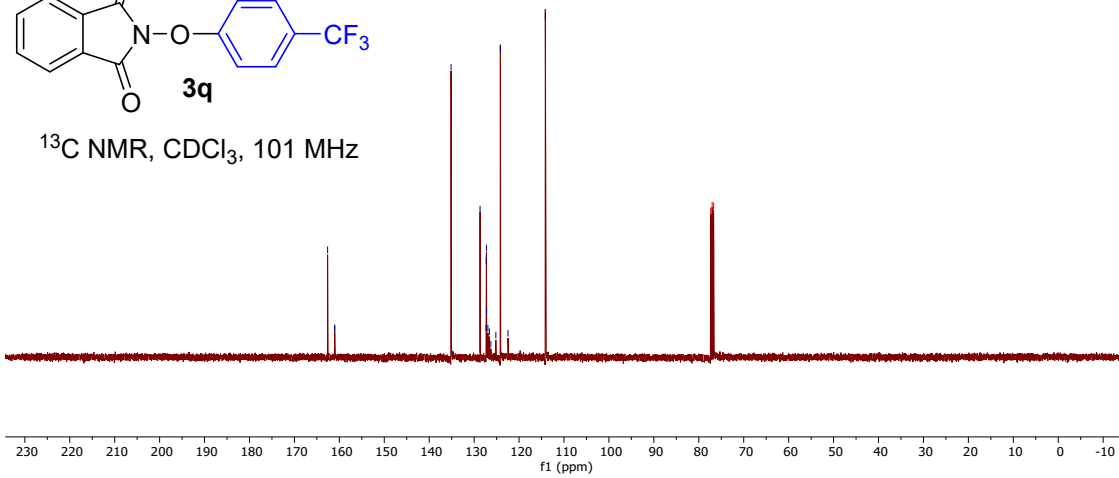



S39

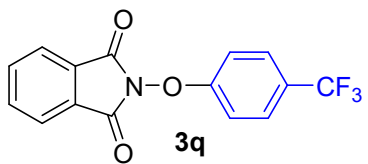

$^{19}\text{F}$  NMR,  $\text{CDCl}_3$ , 471 MHz

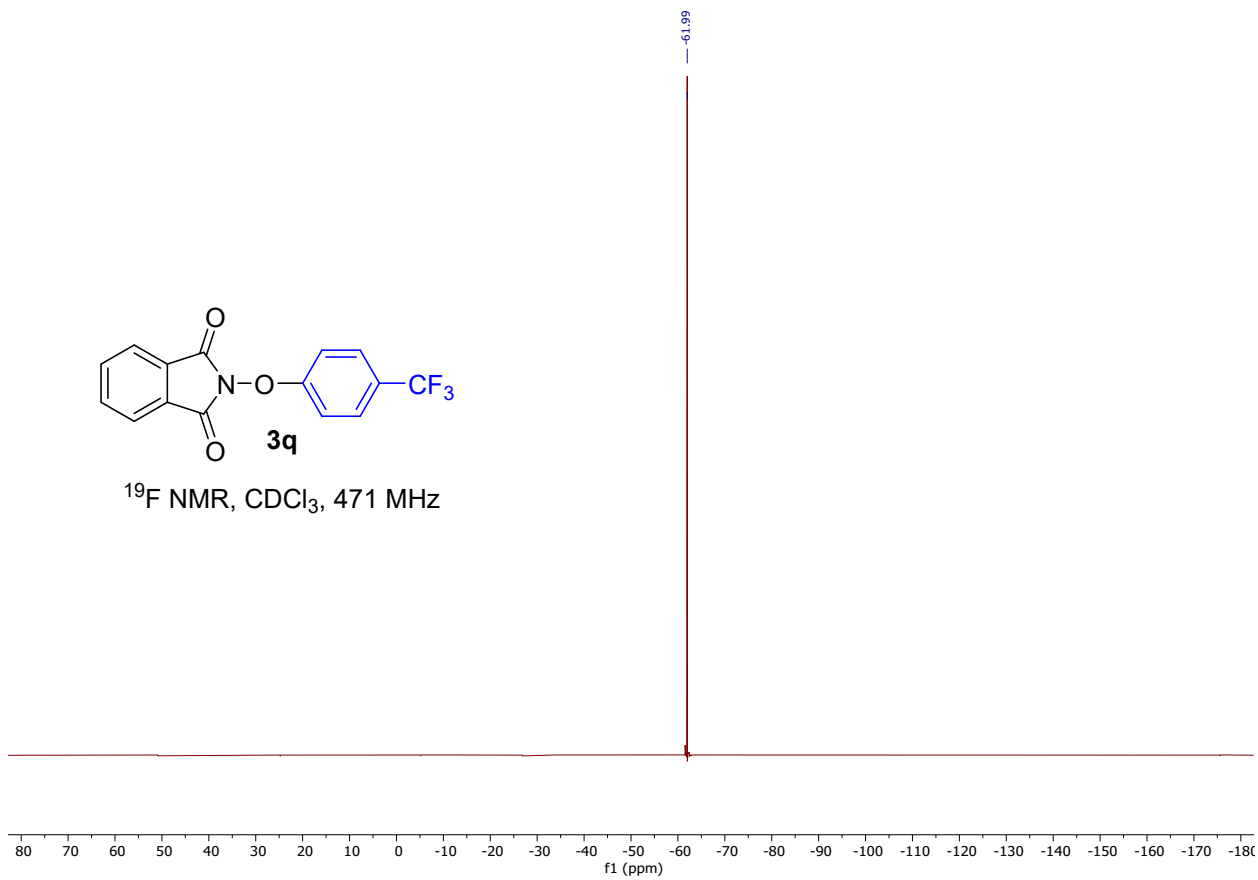

S40

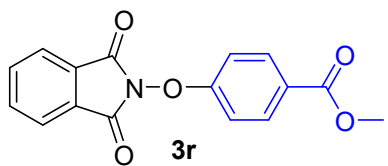

$^1\text{H NMR}$ ,  $\text{DMSO-}d_6$ , 400 MHz

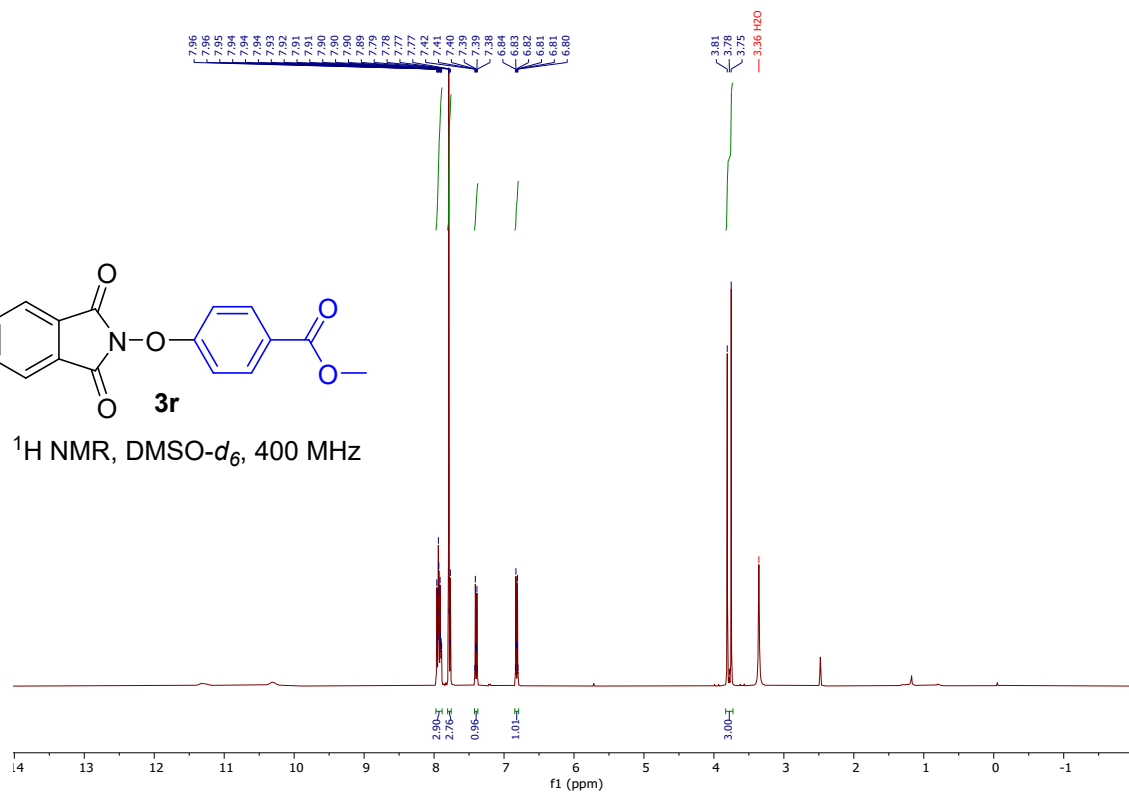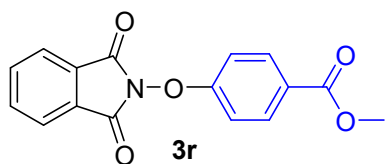

$^{13}\text{C NMR}$ ,  $\text{DMSO-}d_6$ , 101 MHz

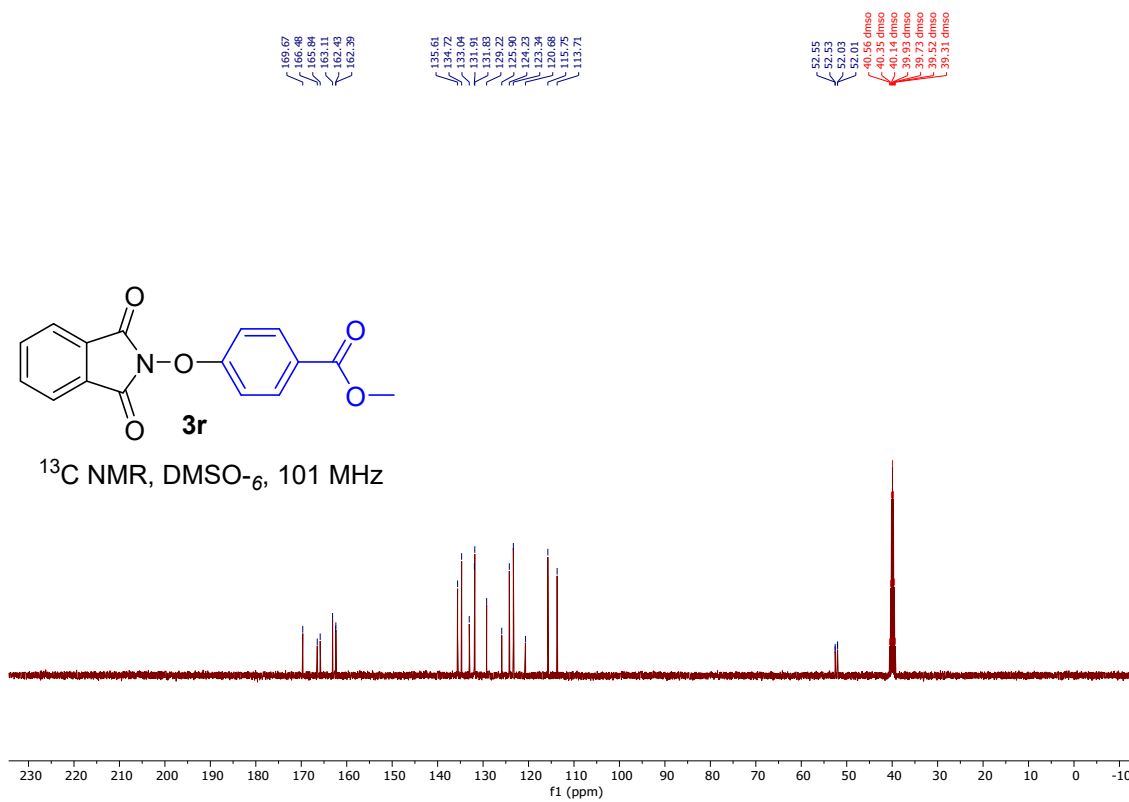

S41

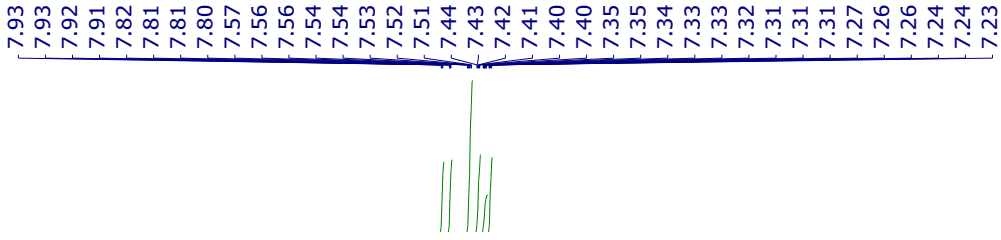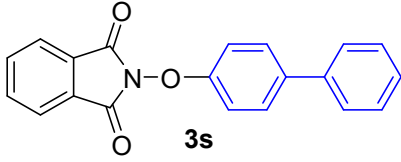

<sup>1</sup>H NMR, CDCl<sub>3</sub>, 400 MHz

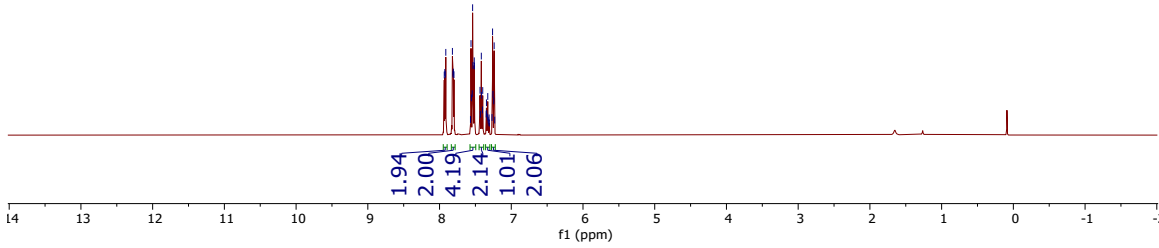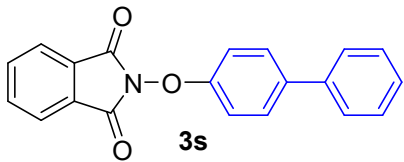

<sup>13</sup>C NMR, CDCl<sub>3</sub>, 101 MHz

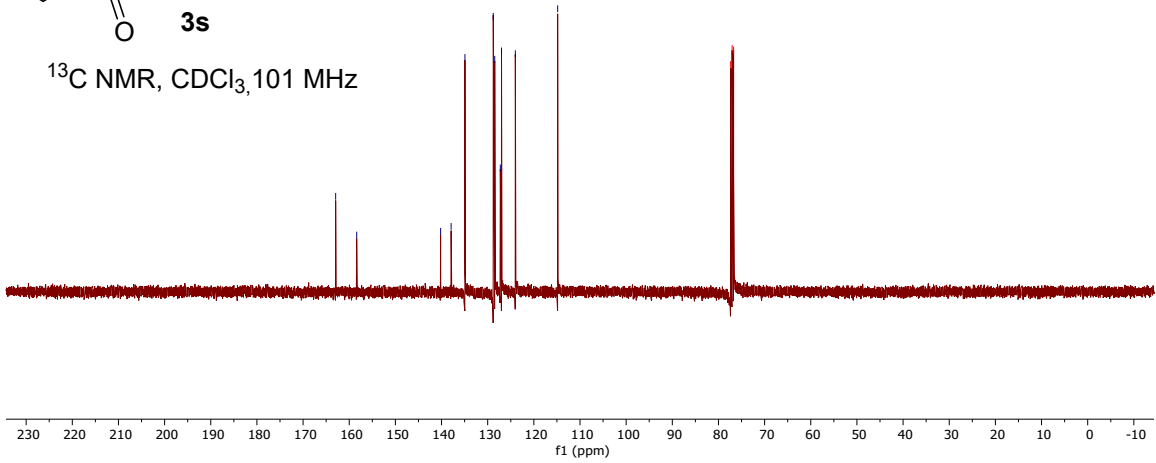

S42

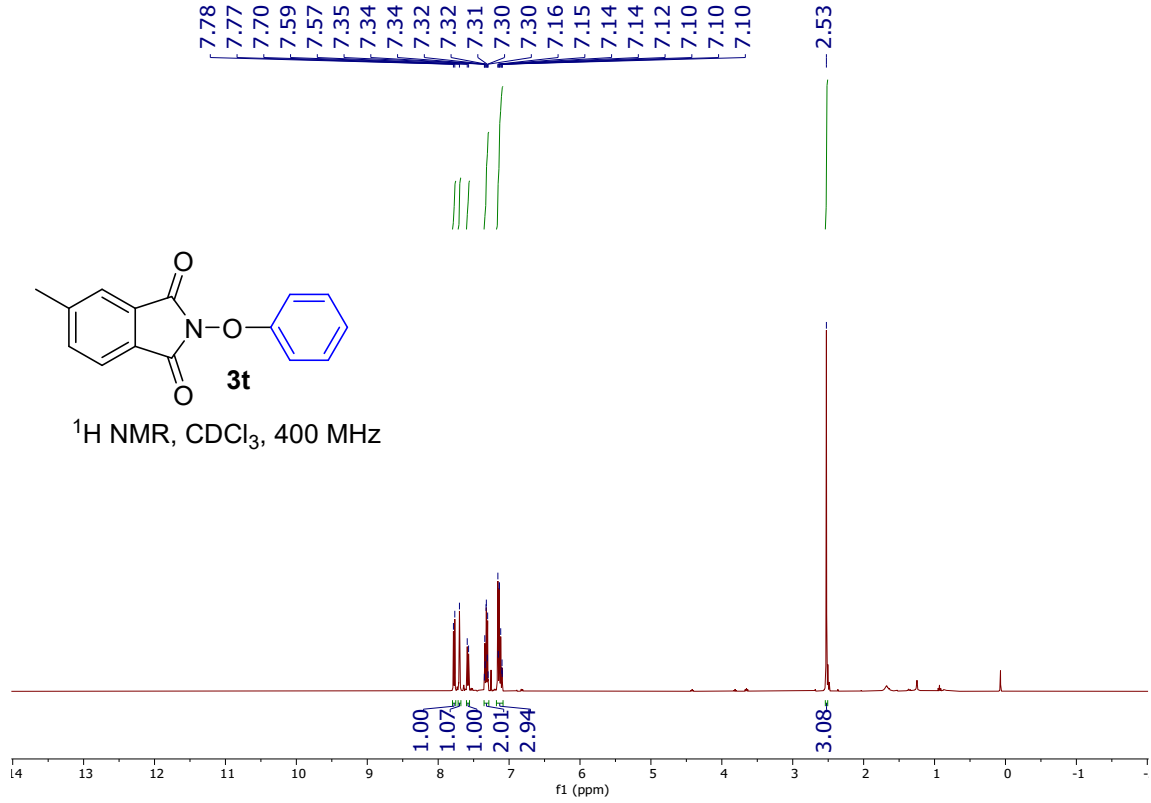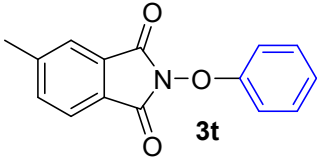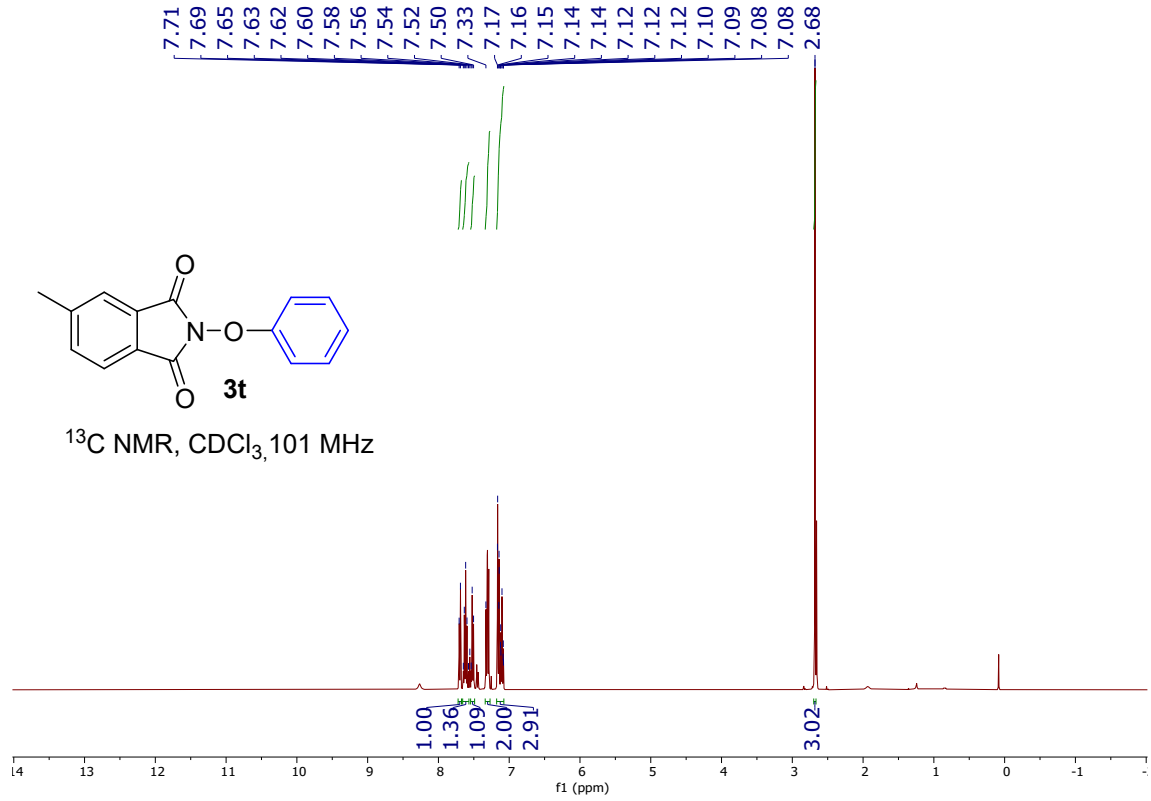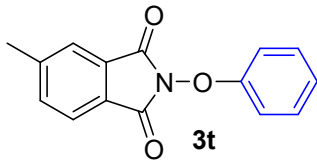

S43

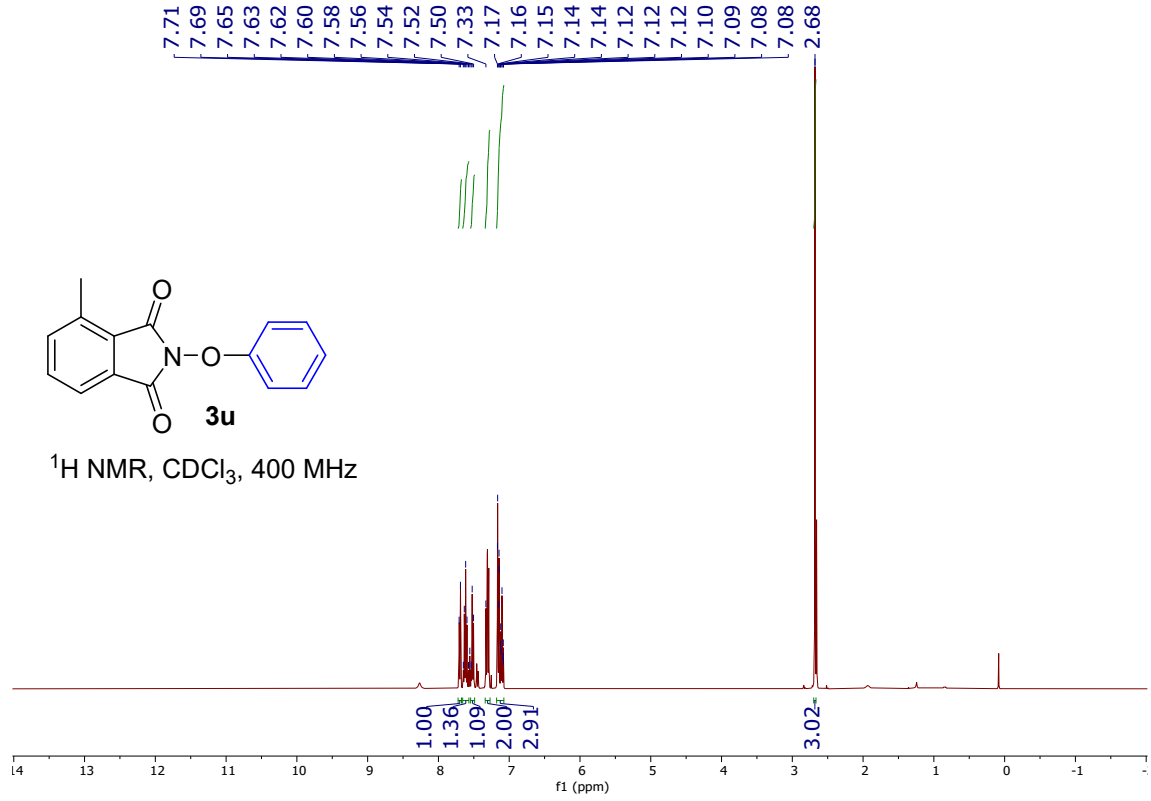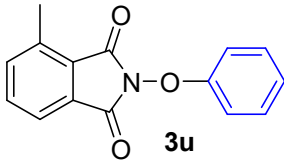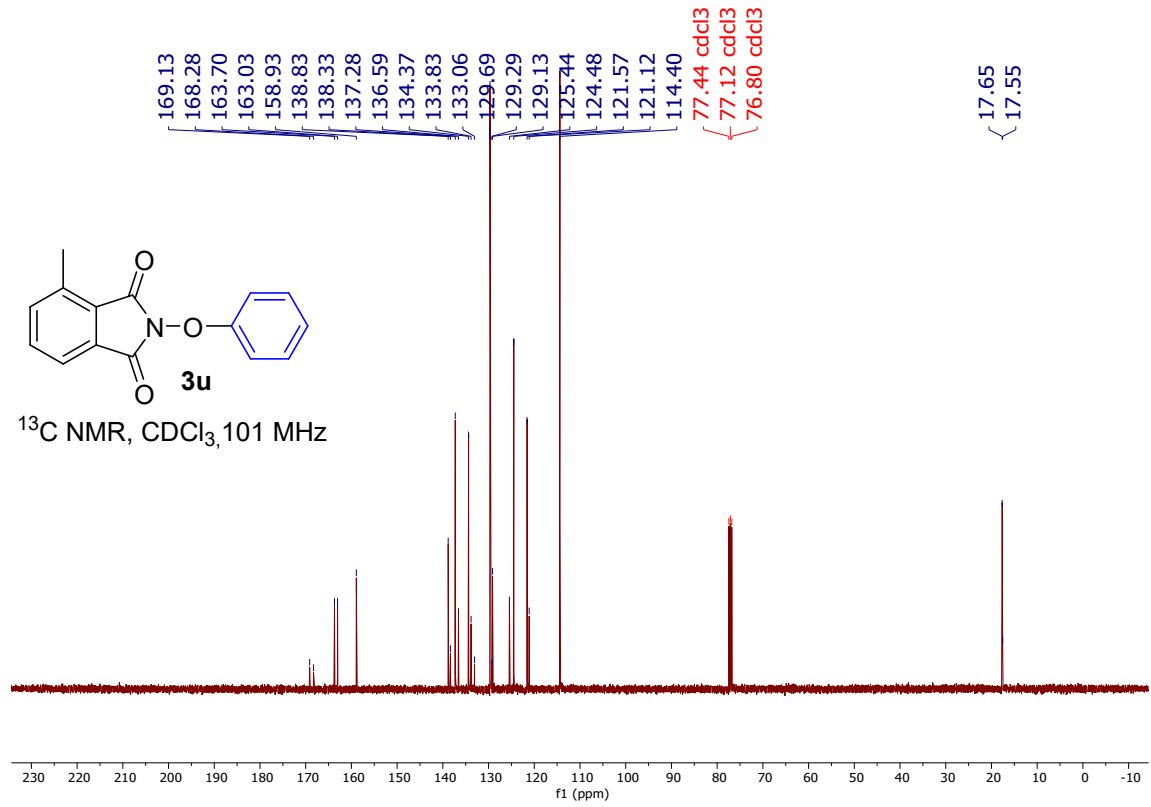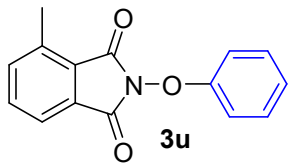

S44

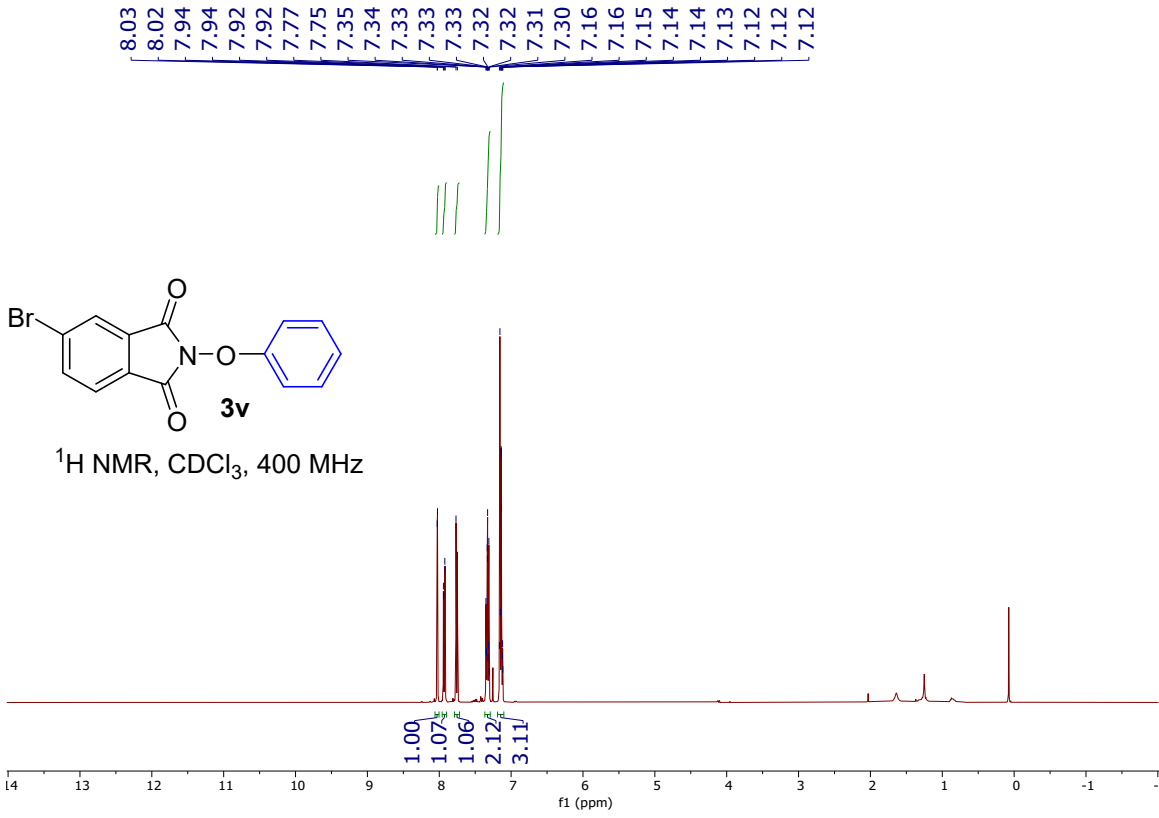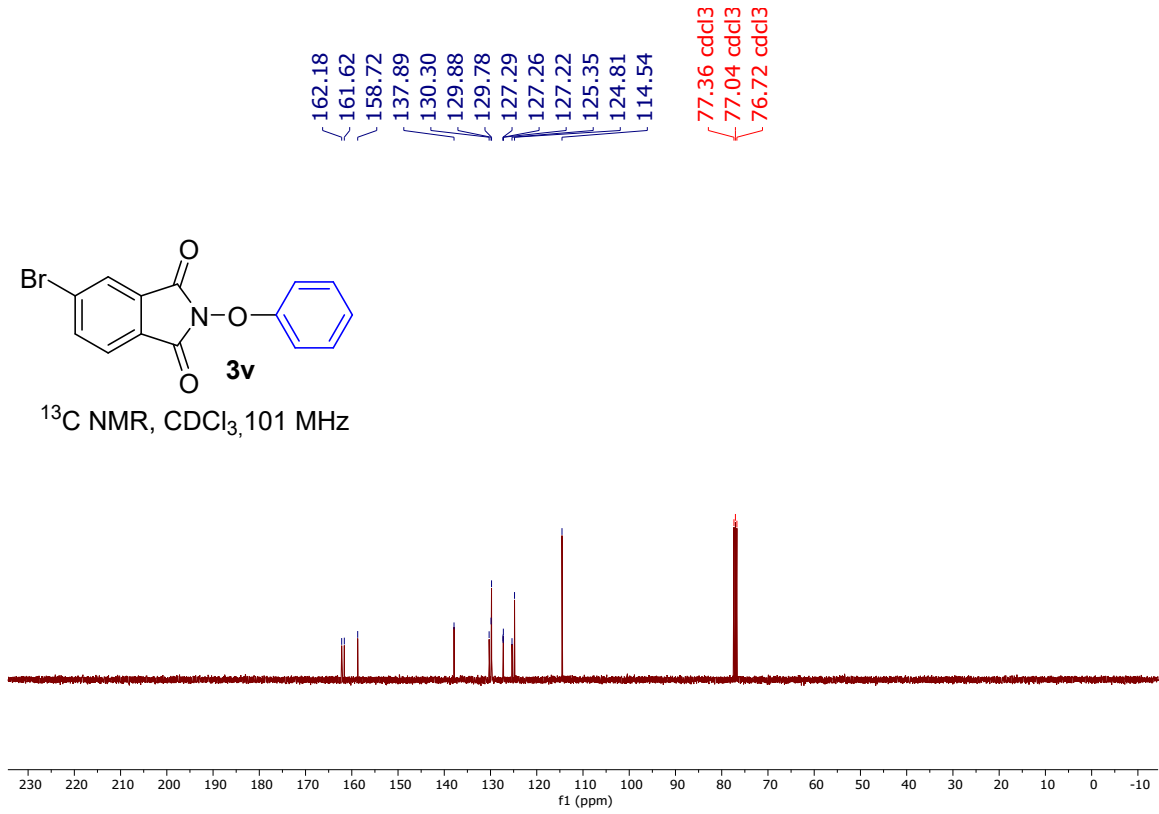

S45

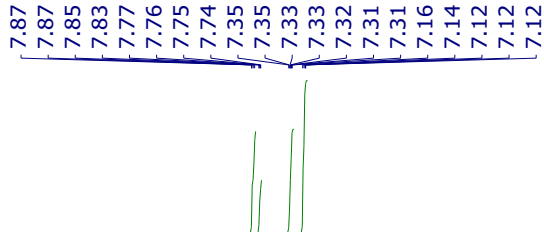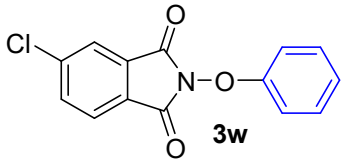

<sup>1</sup>H NMR, CDCl<sub>3</sub>, 400 MHz

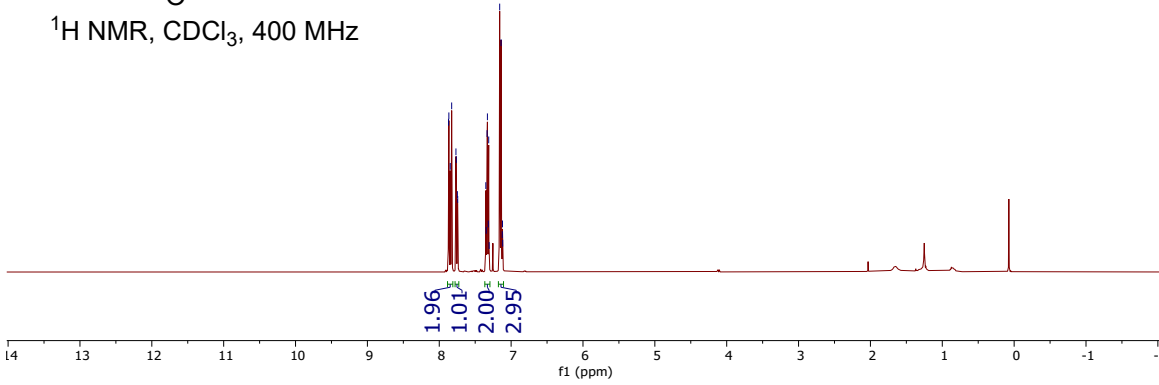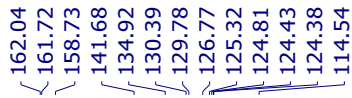

77.37 cdcl3  
77.05 cdcl3  
76.73 cdcl3

-16.63

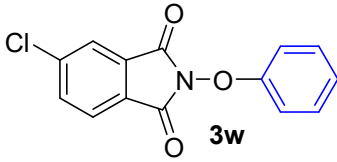

<sup>13</sup>C NMR, CDCl<sub>3</sub>, 101 MHz

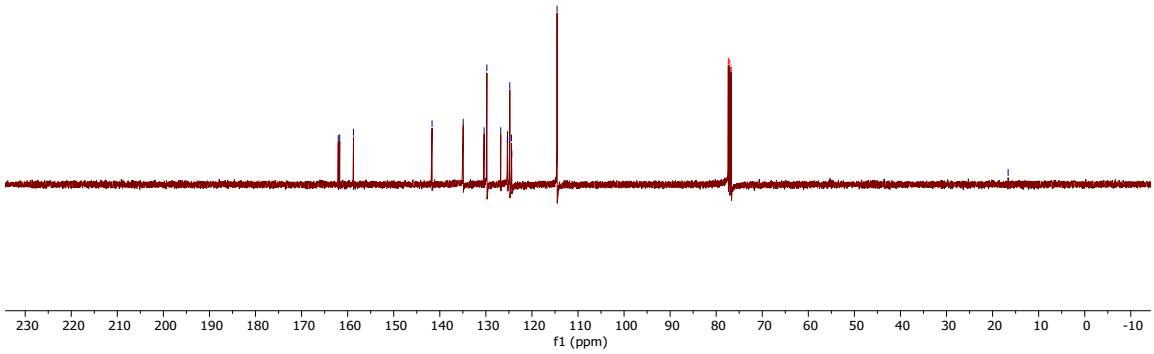

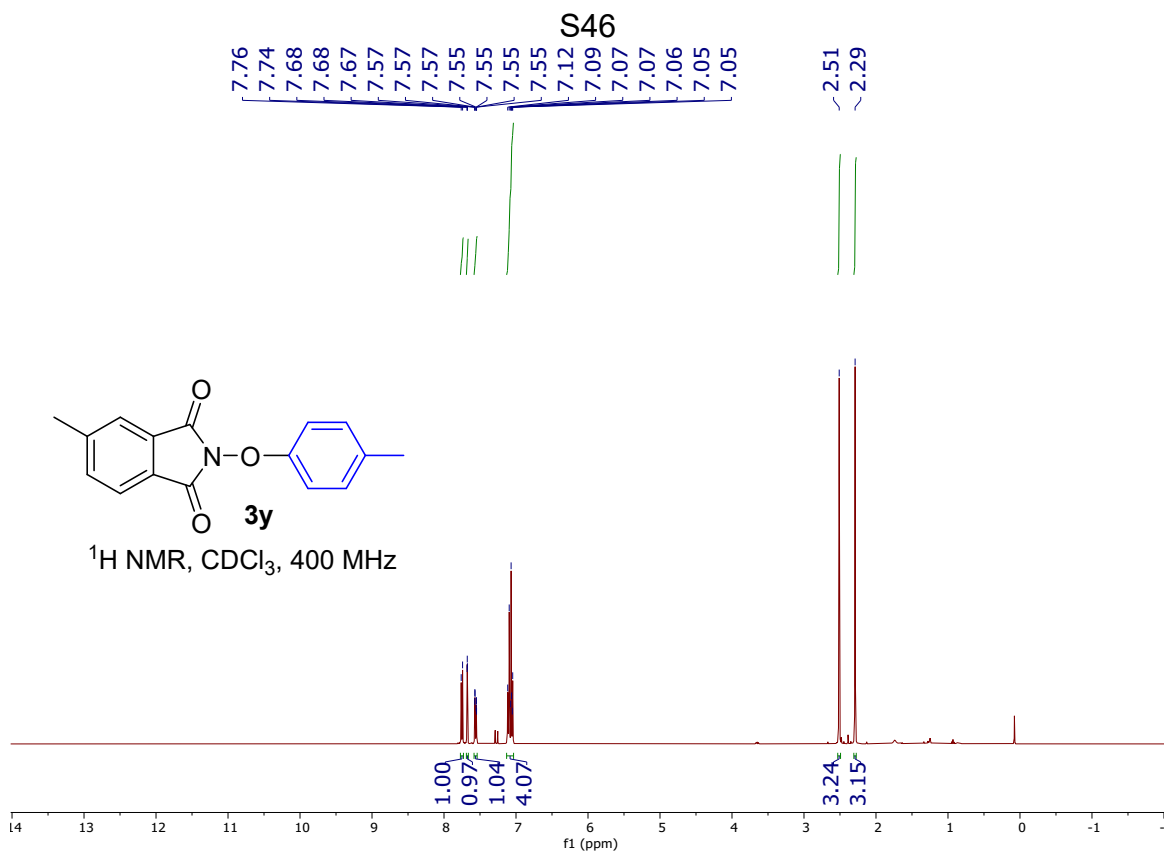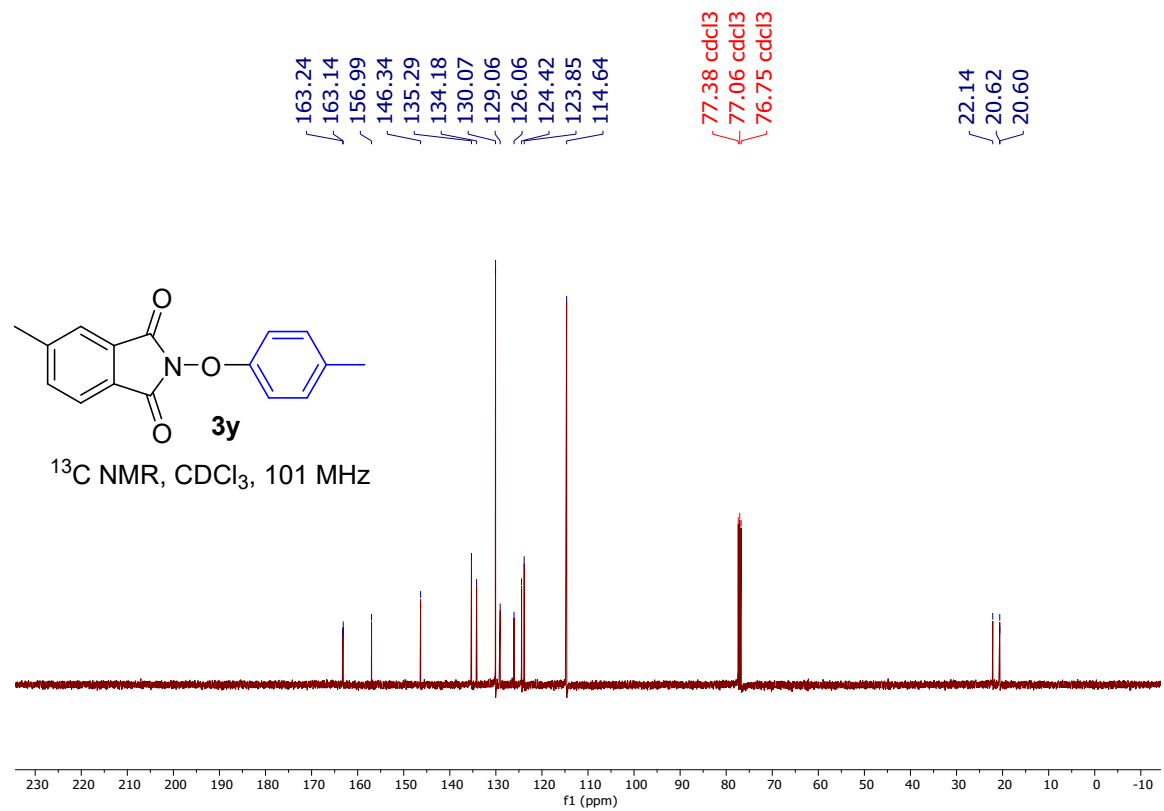



S47

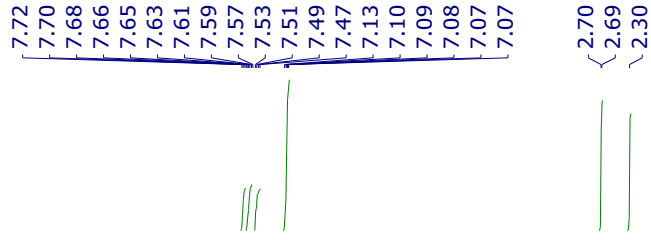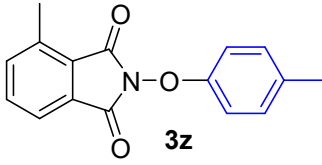

<sup>1</sup>H NMR, CDCl<sub>3</sub>, 400 MHz

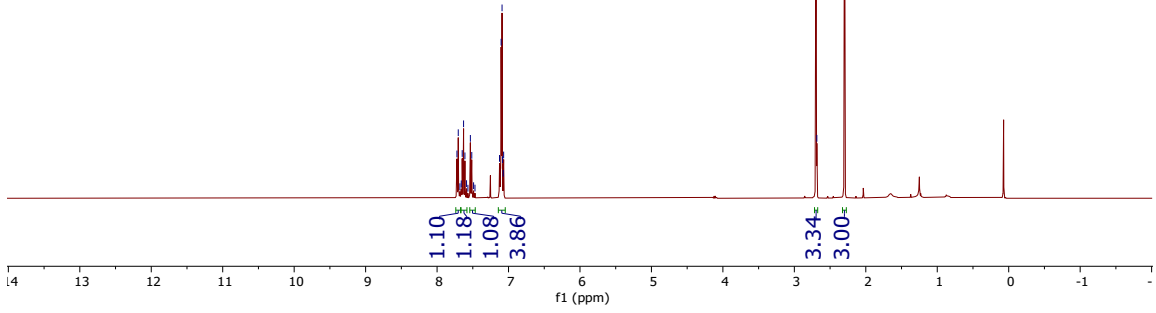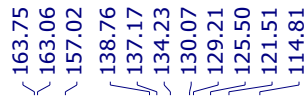

77.35 cdd13  
77.03 cdd13  
76.71 cdd13

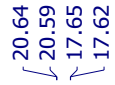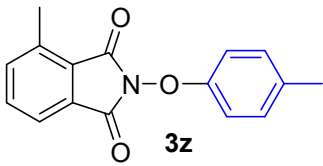

<sup>13</sup>C NMR, CDCl<sub>3</sub>, 101 MHz

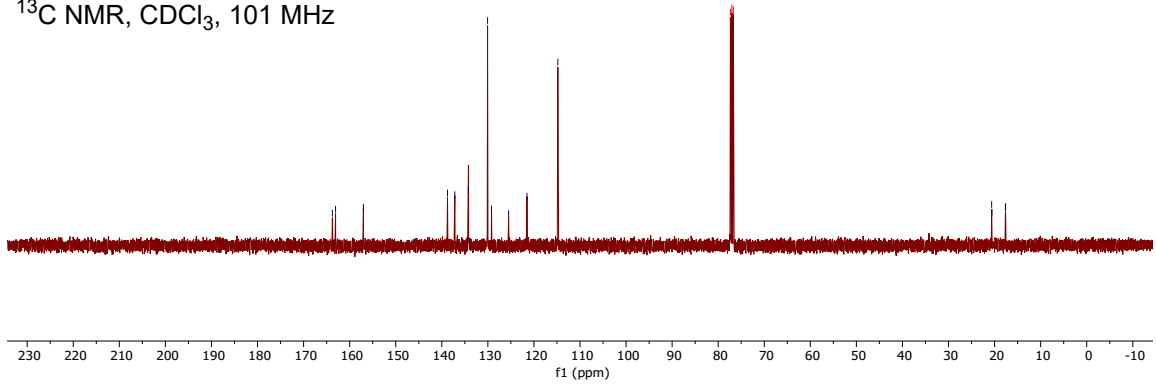

S48

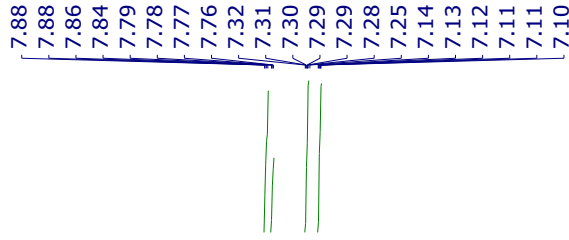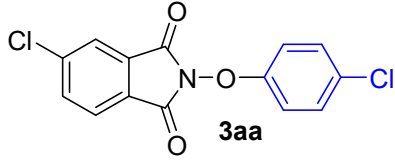

<sup>1</sup>H NMR, CDCl<sub>3</sub>, 400 MHz

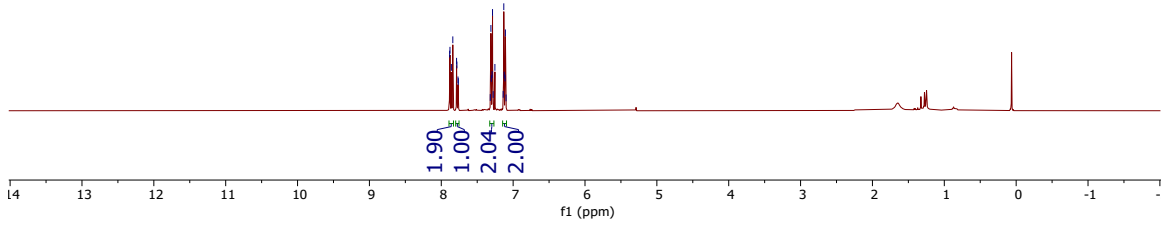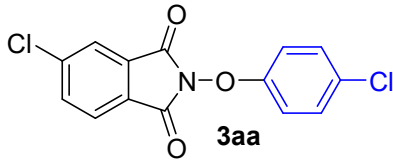

<sup>13</sup>C NMR, CDCl<sub>3</sub>, 101 MHz

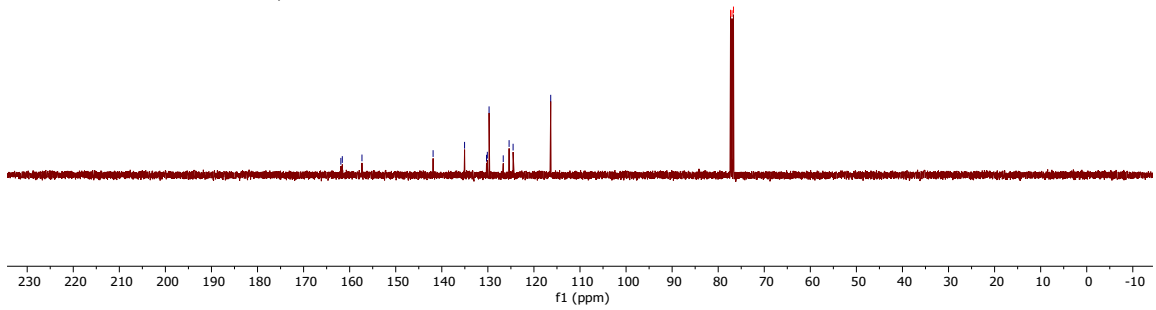

S49

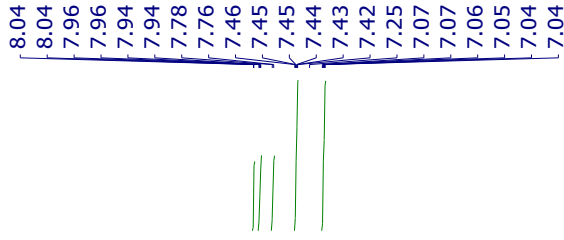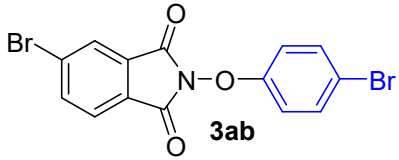

$^1\text{H}$  NMR,  $\text{CDCl}_3$ , 400 MHz

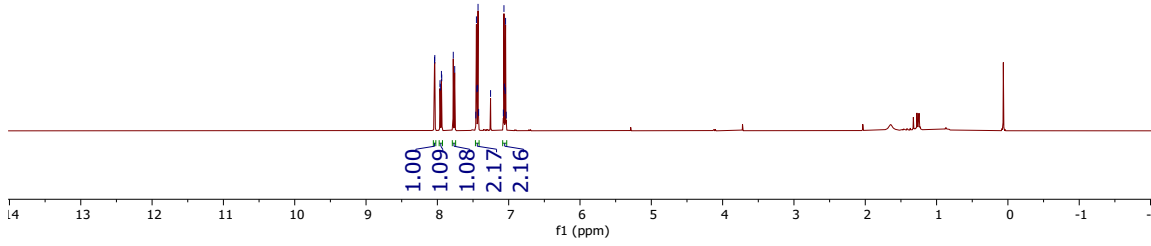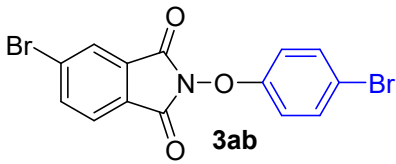

$^{13}\text{C}$  NMR,  $\text{CDCl}_3$ , 101 MHz

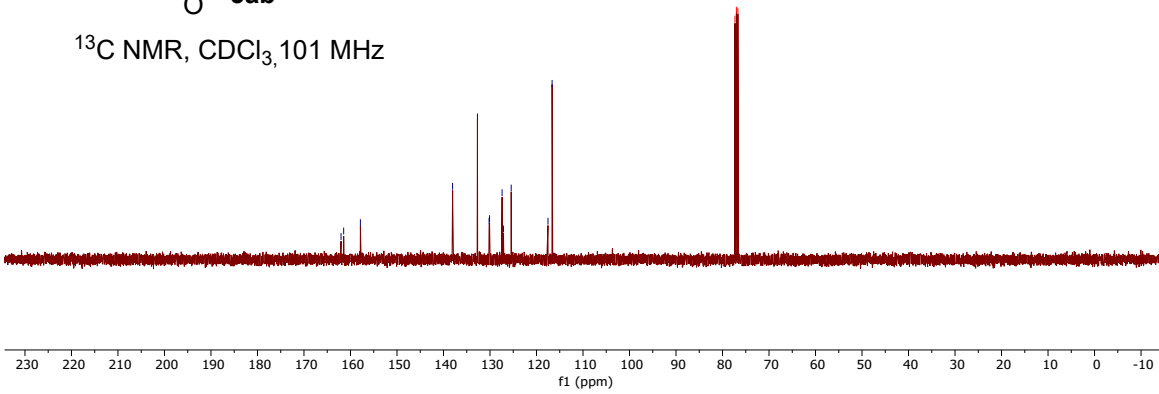

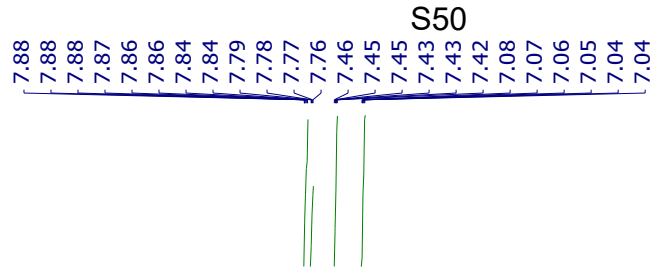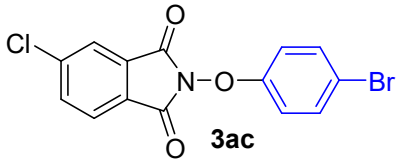

<sup>1</sup>H NMR, CDCl<sub>3</sub>, 400 MHz

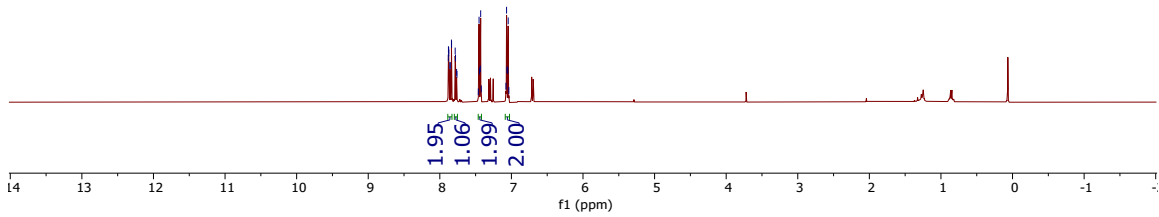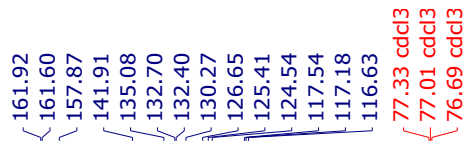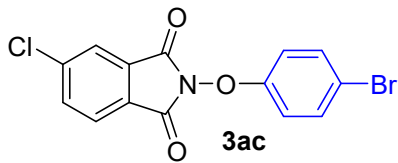

<sup>13</sup>C NMR, CDCl<sub>3</sub>, 101 MHz

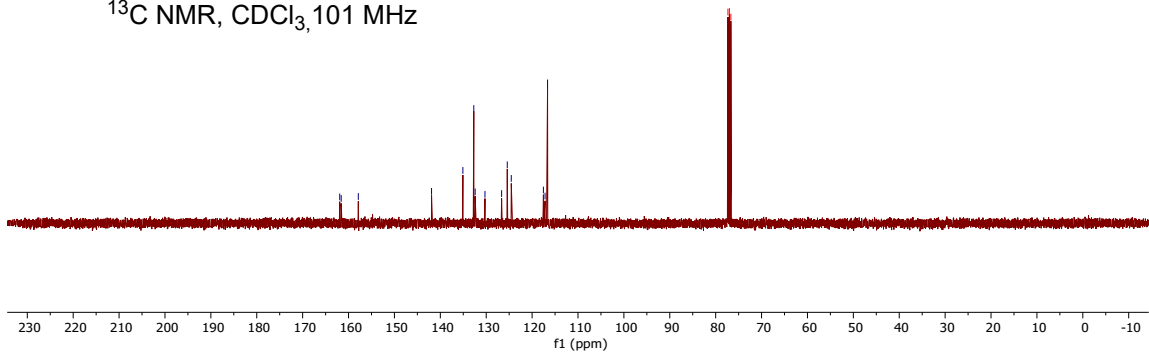

S51

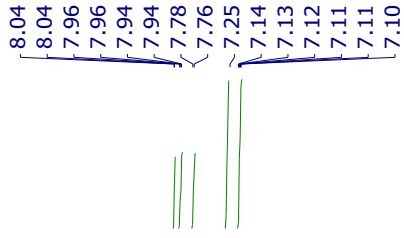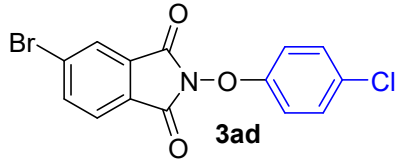

<sup>1</sup>H NMR, CDCl<sub>3</sub>, 400 MHz

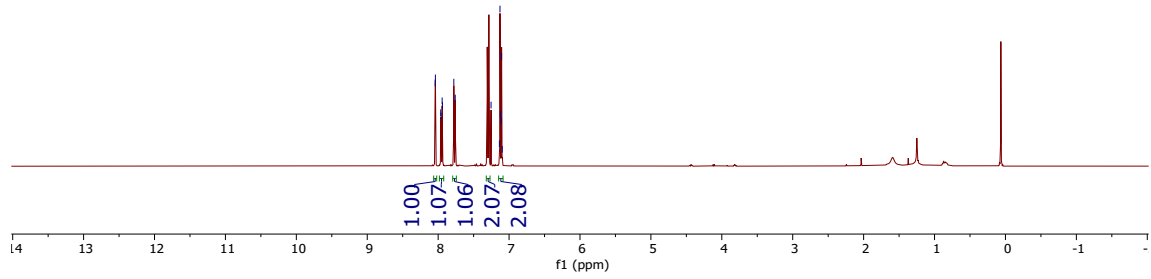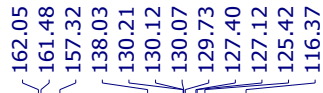

77.31 cdcl3  
77.00 cdcl3  
76.68 cdcl3

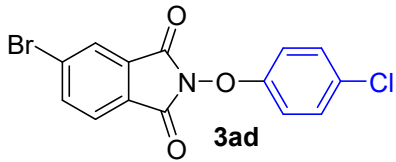

<sup>13</sup>C NMR, CDCl<sub>3</sub>, 101 MHz

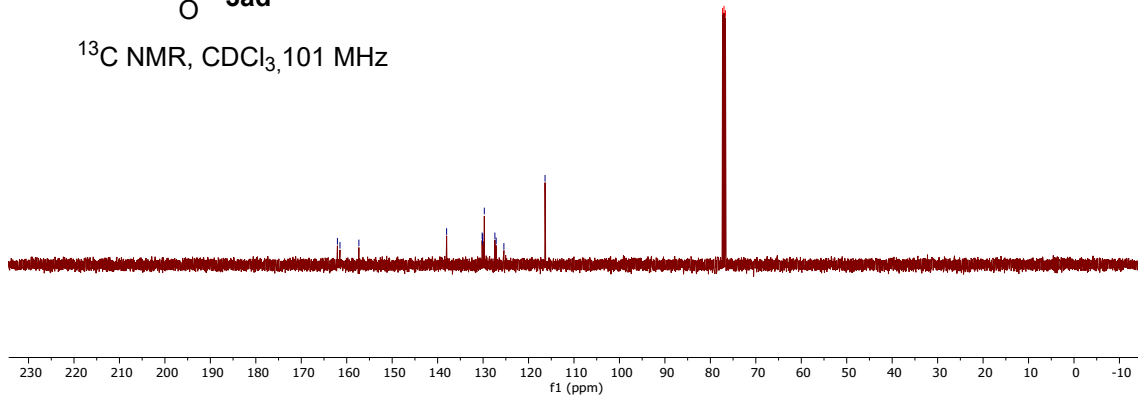

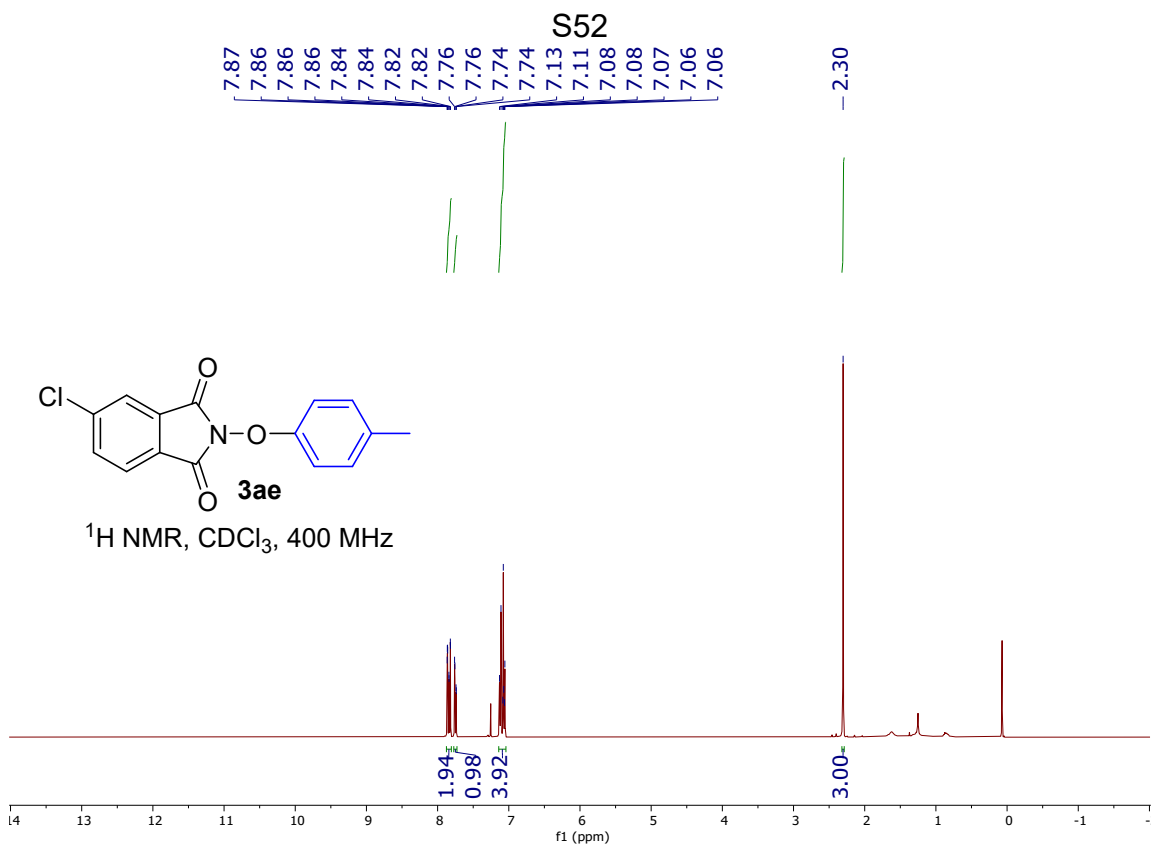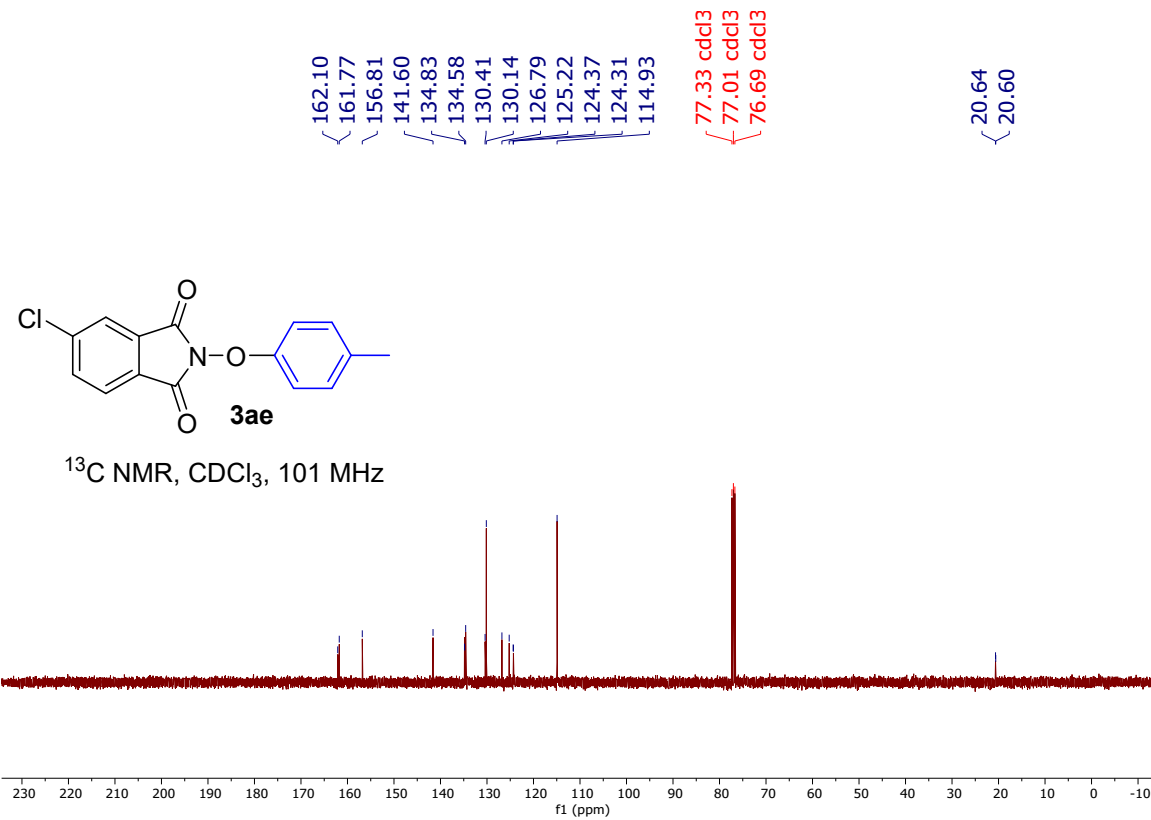

S53

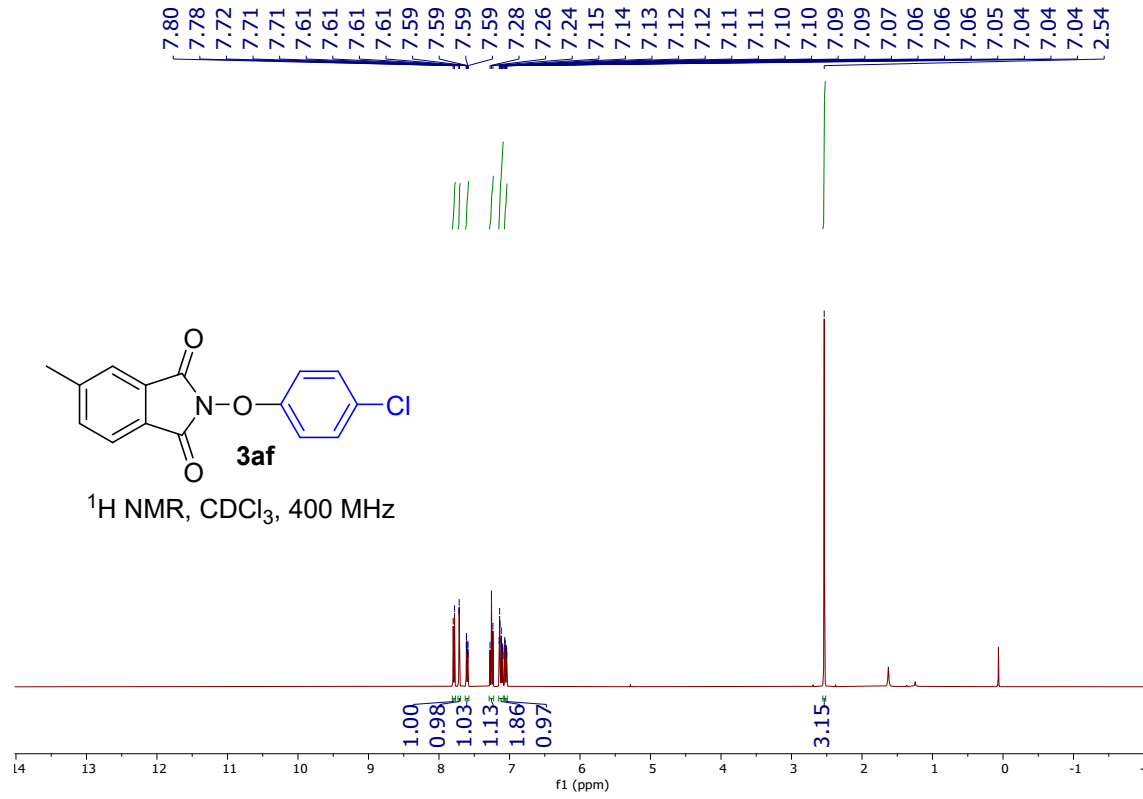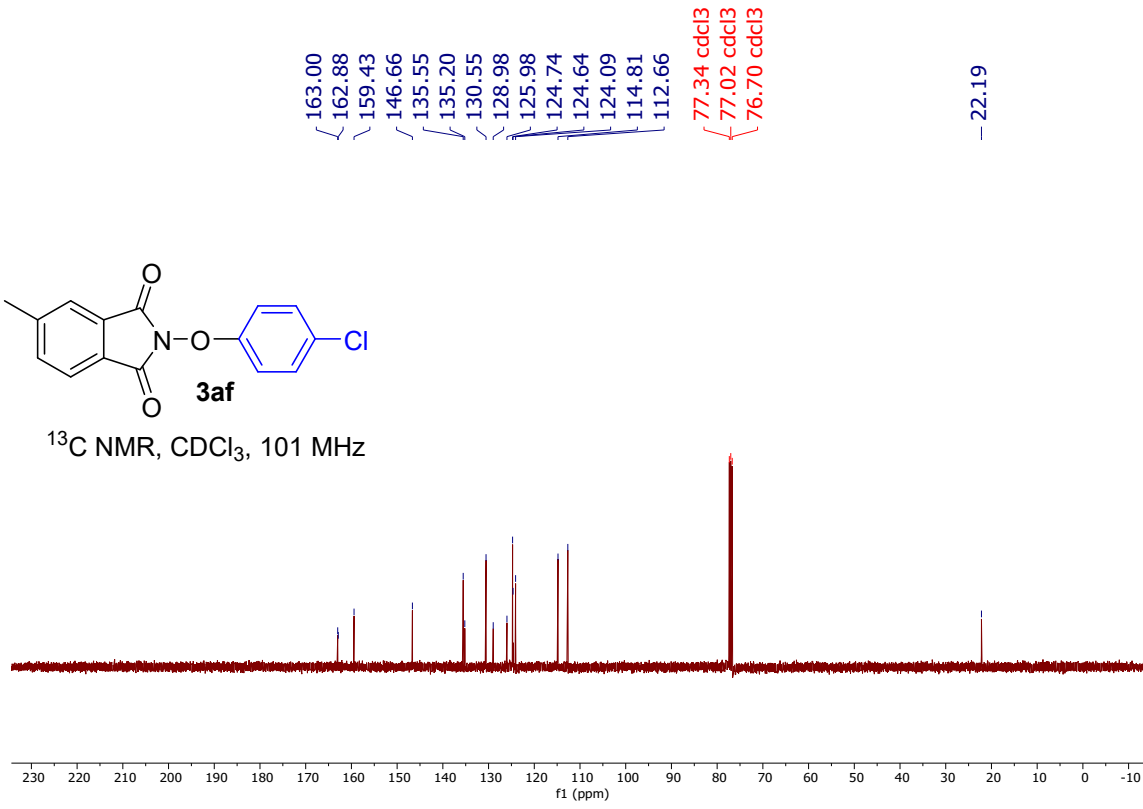

S54

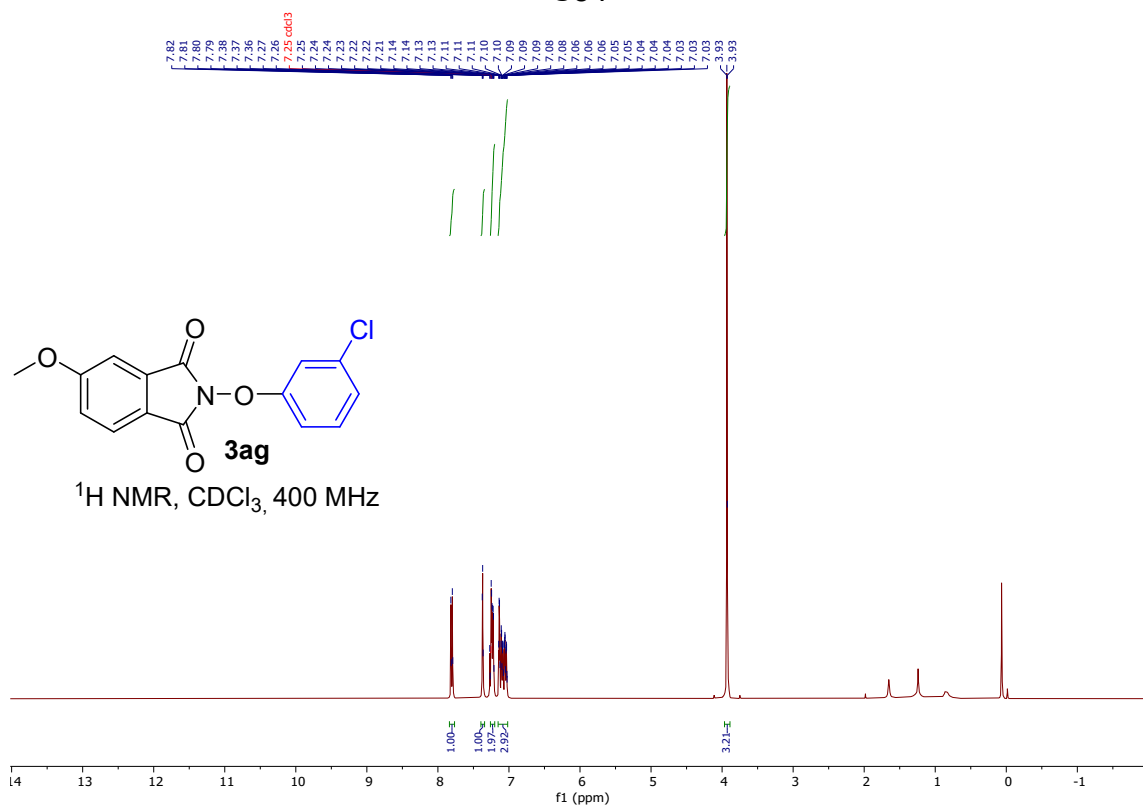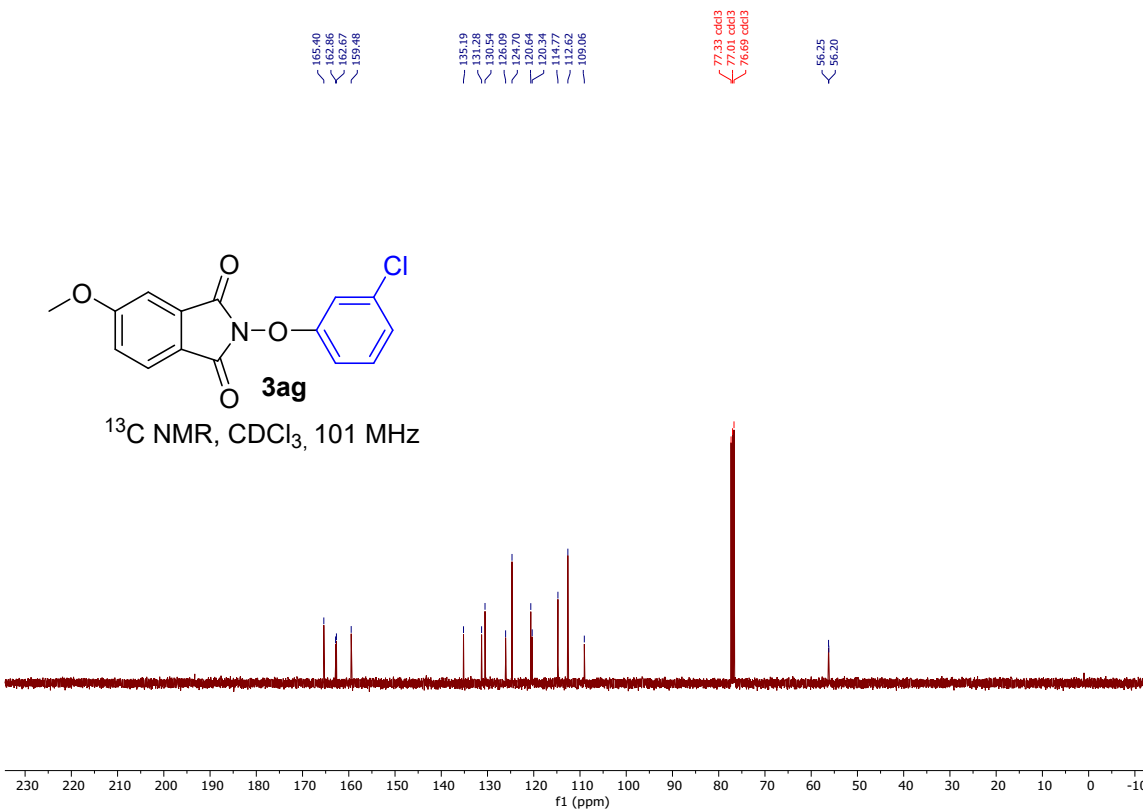



S55

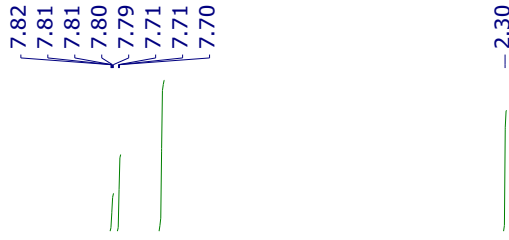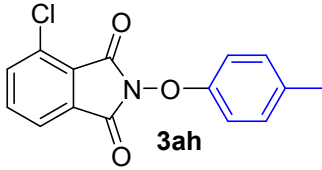

<sup>1</sup>H NMR, CDCl<sub>3</sub>, 400 MHz

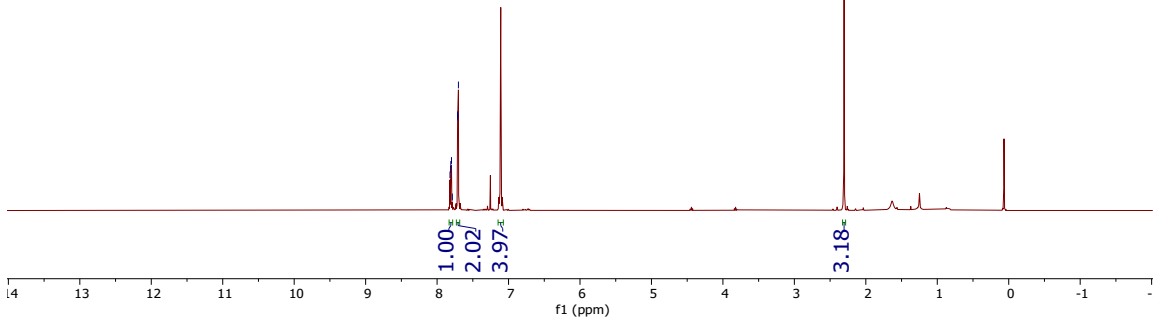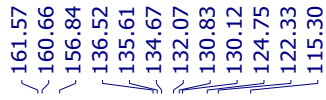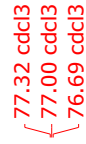

-20.63

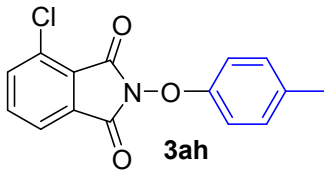

<sup>13</sup>C NMR, CDCl<sub>3</sub>, 101 MHz

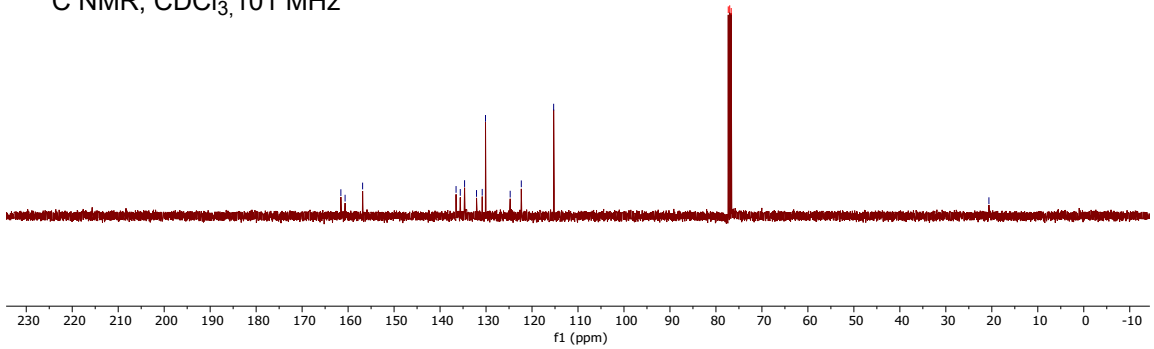

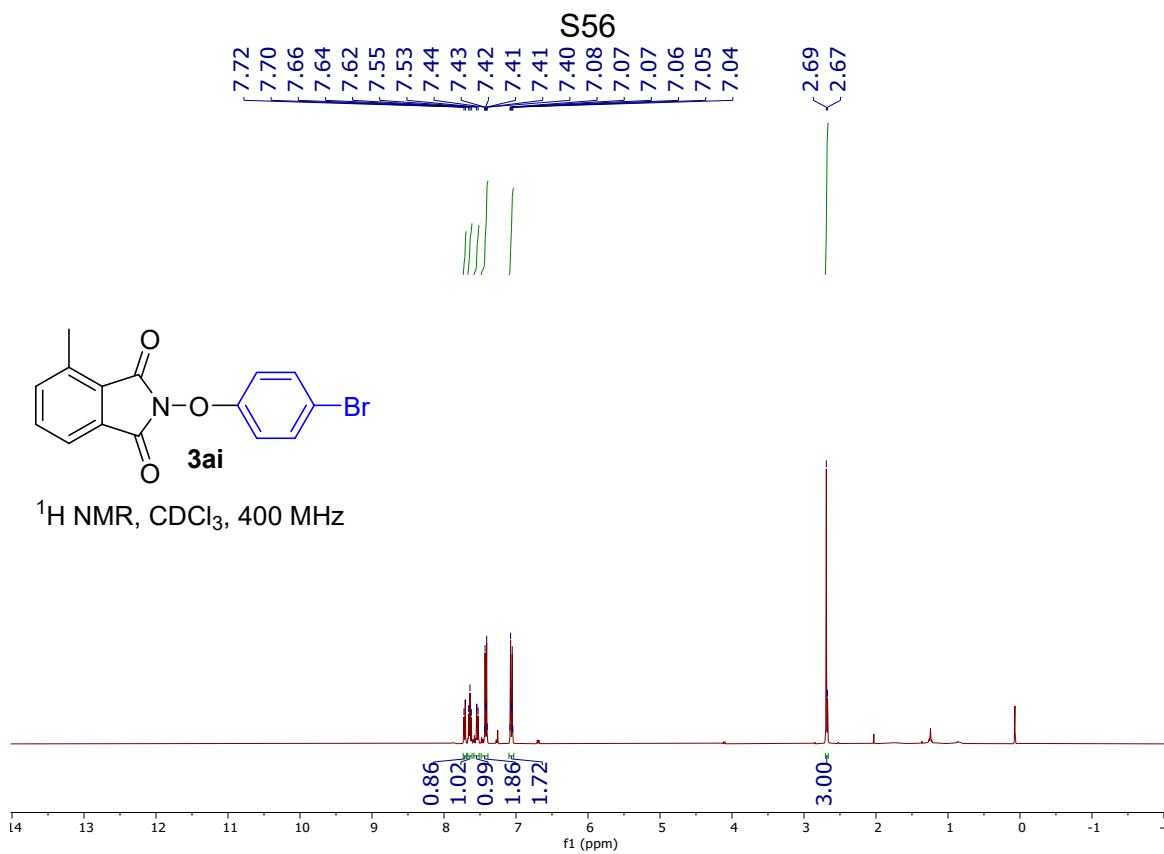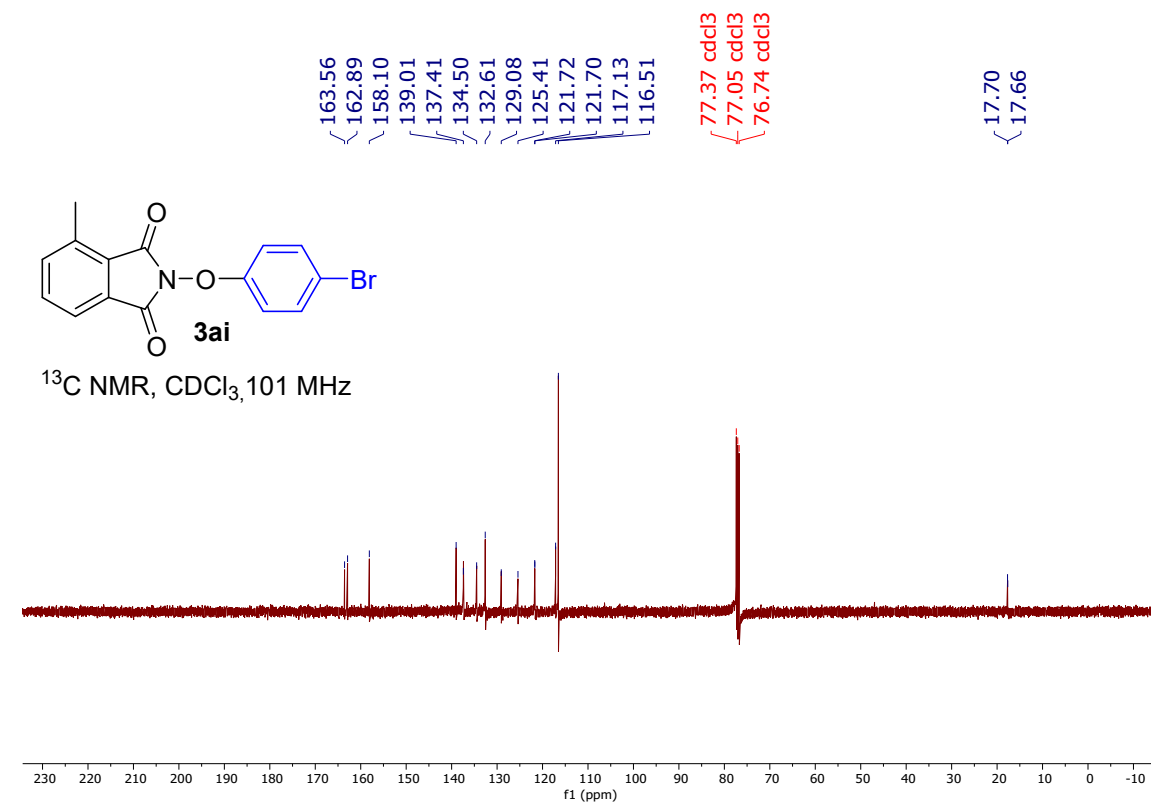

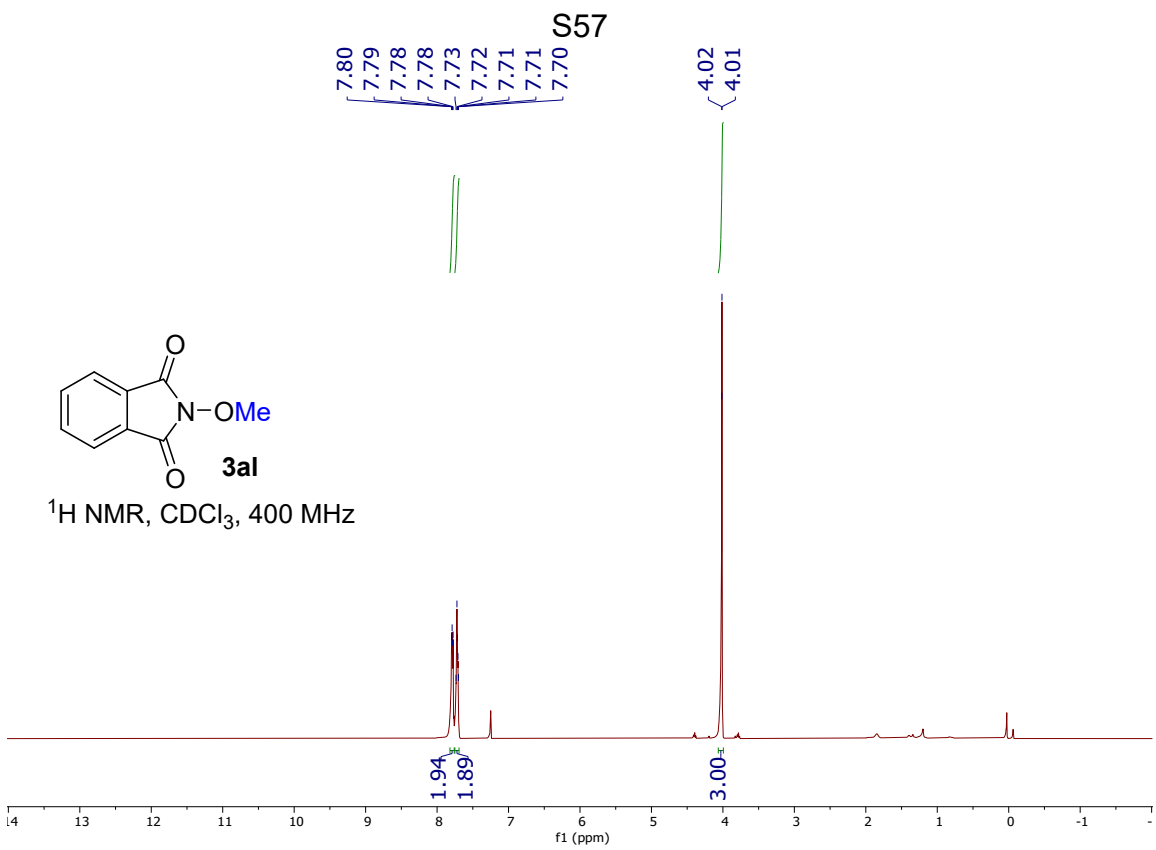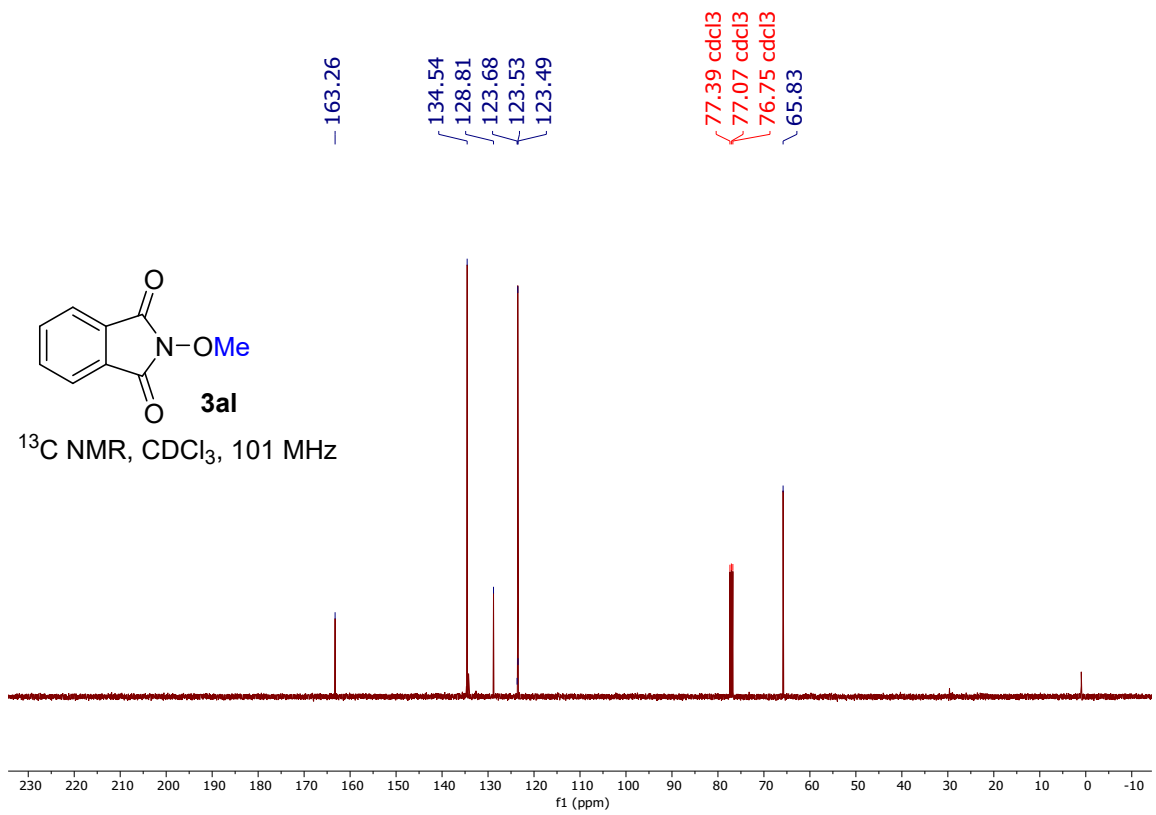

S58

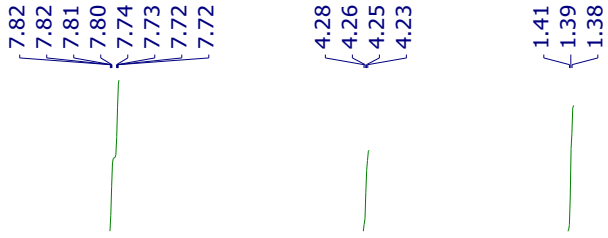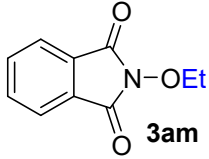

<sup>1</sup>H NMR, CDCl<sub>3</sub>, 400 MHz

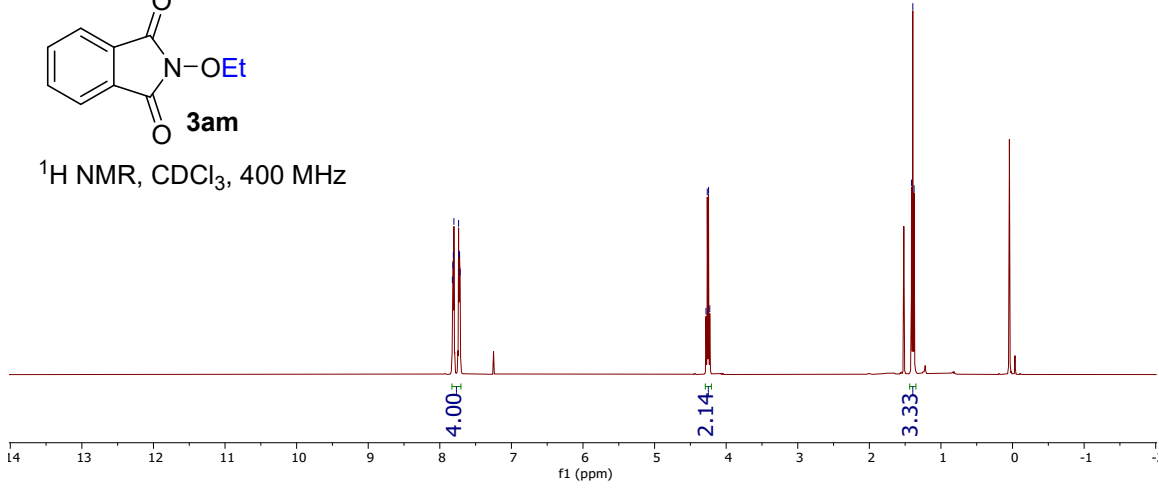

-163.74

-134.44

-128.92

-123.49

77.33 cddCl3  
77.01 cddCl3  
76.69 cddCl3  
74.09

-13.62

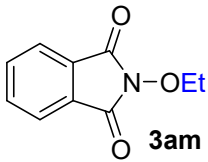

<sup>13</sup>C NMR, CDCl<sub>3</sub>, 101 MHz

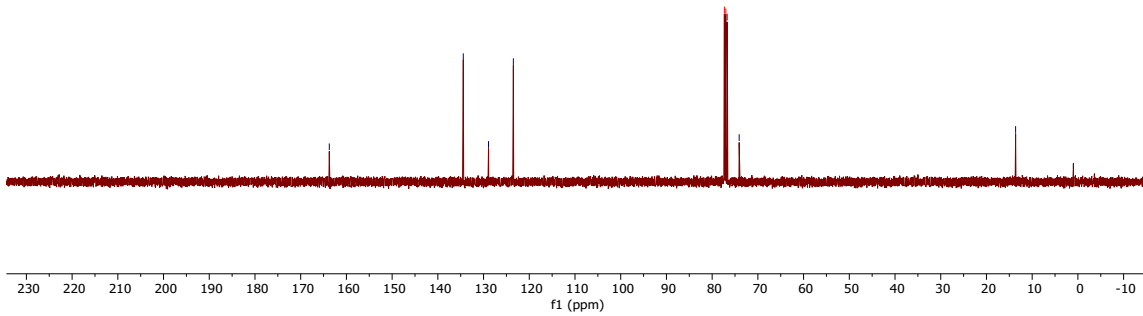

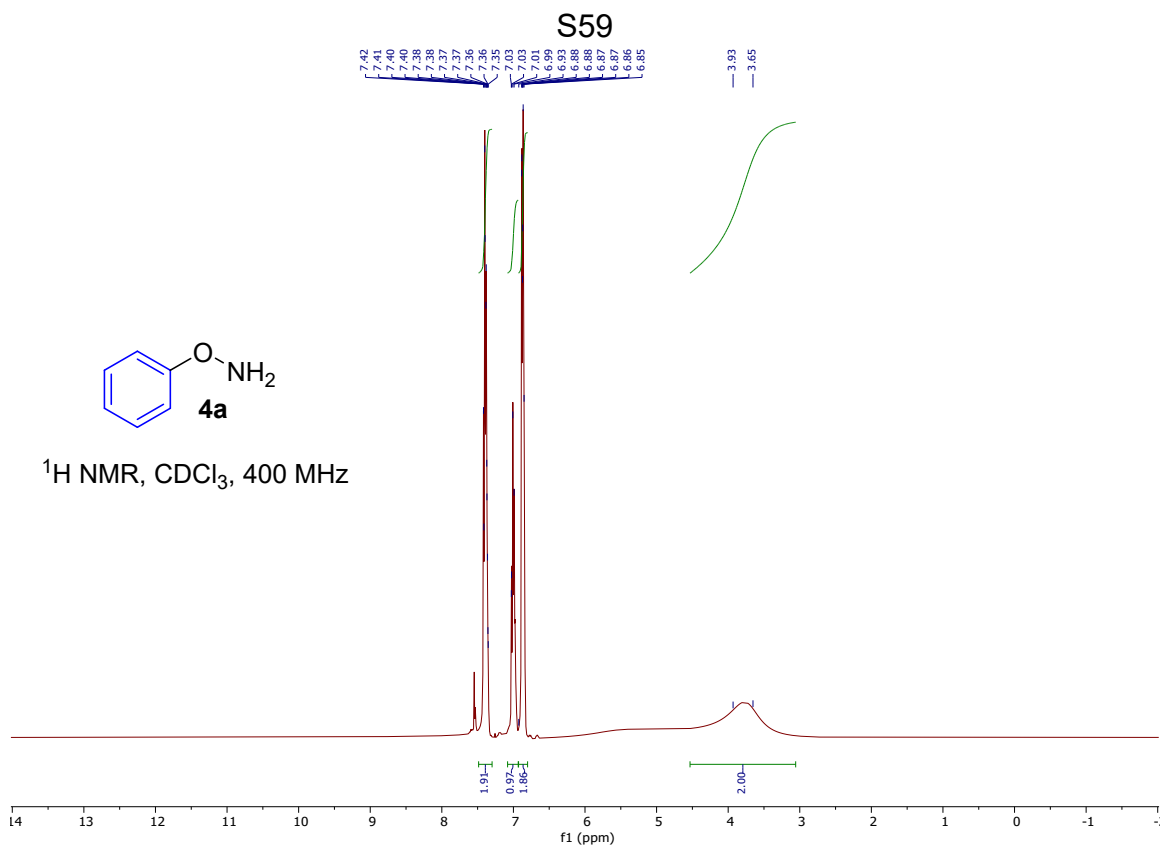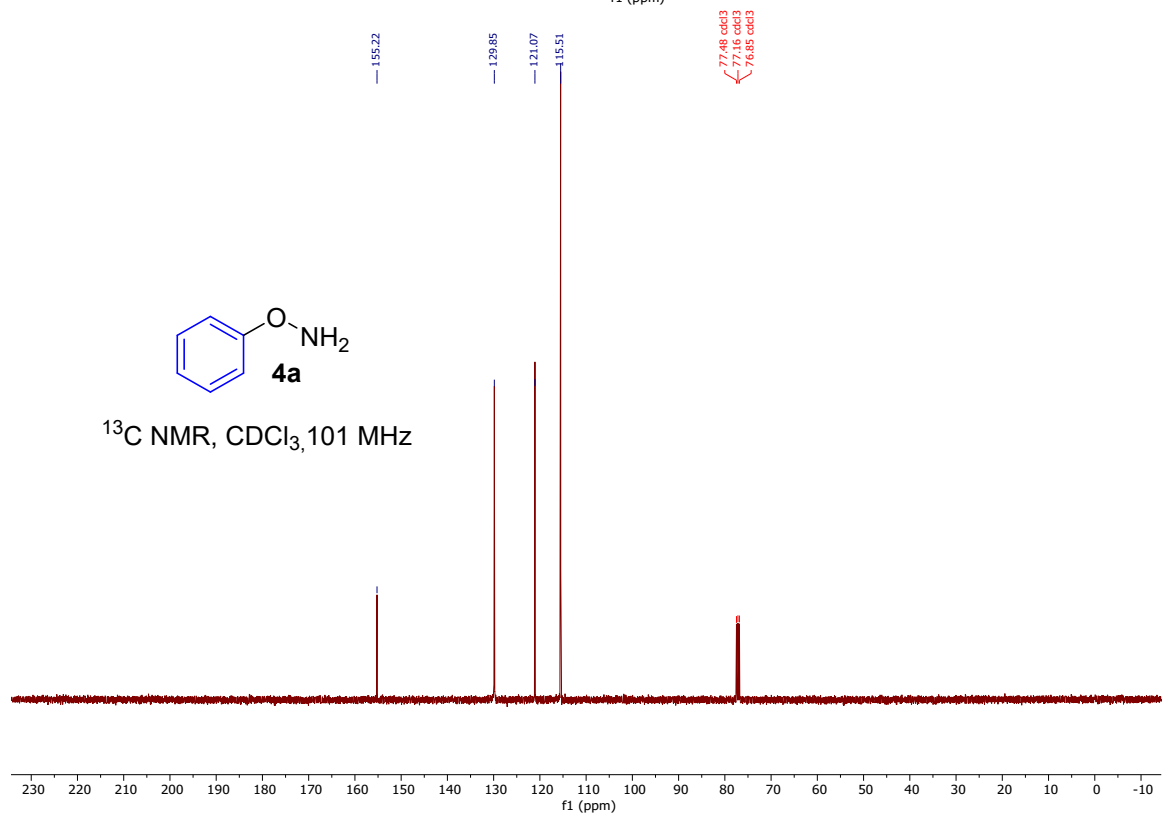

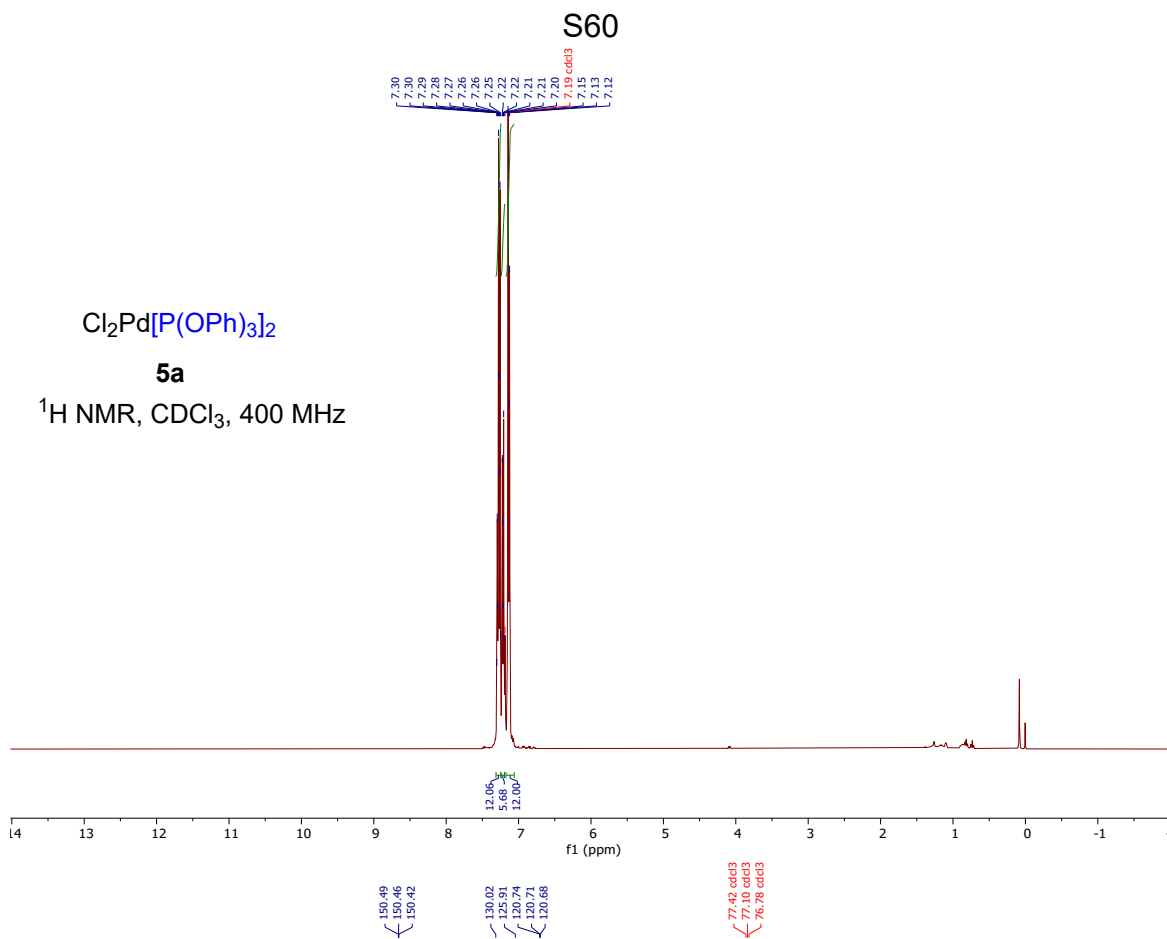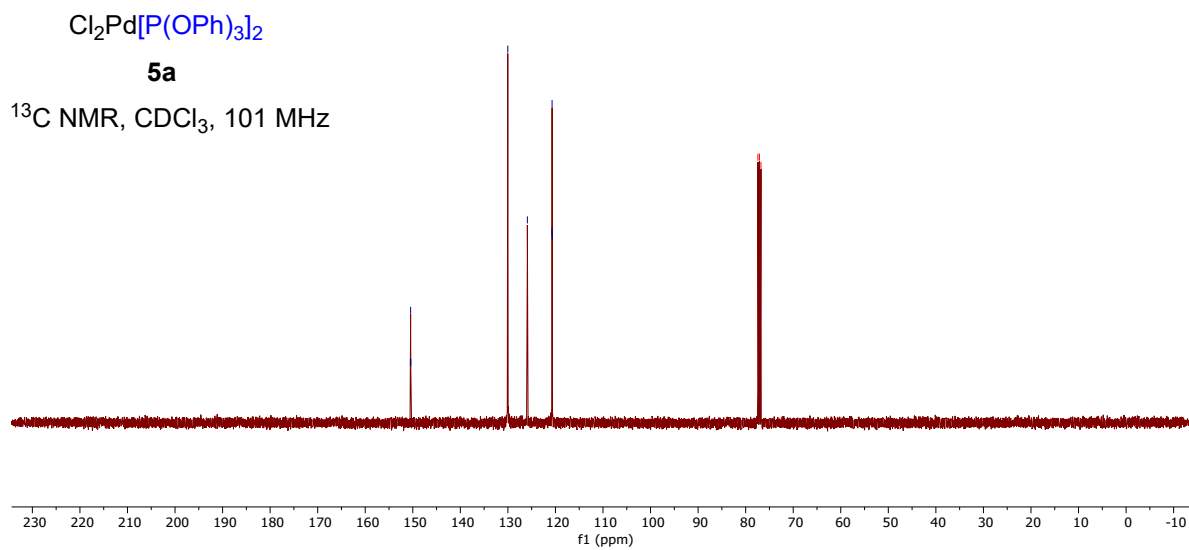

S61

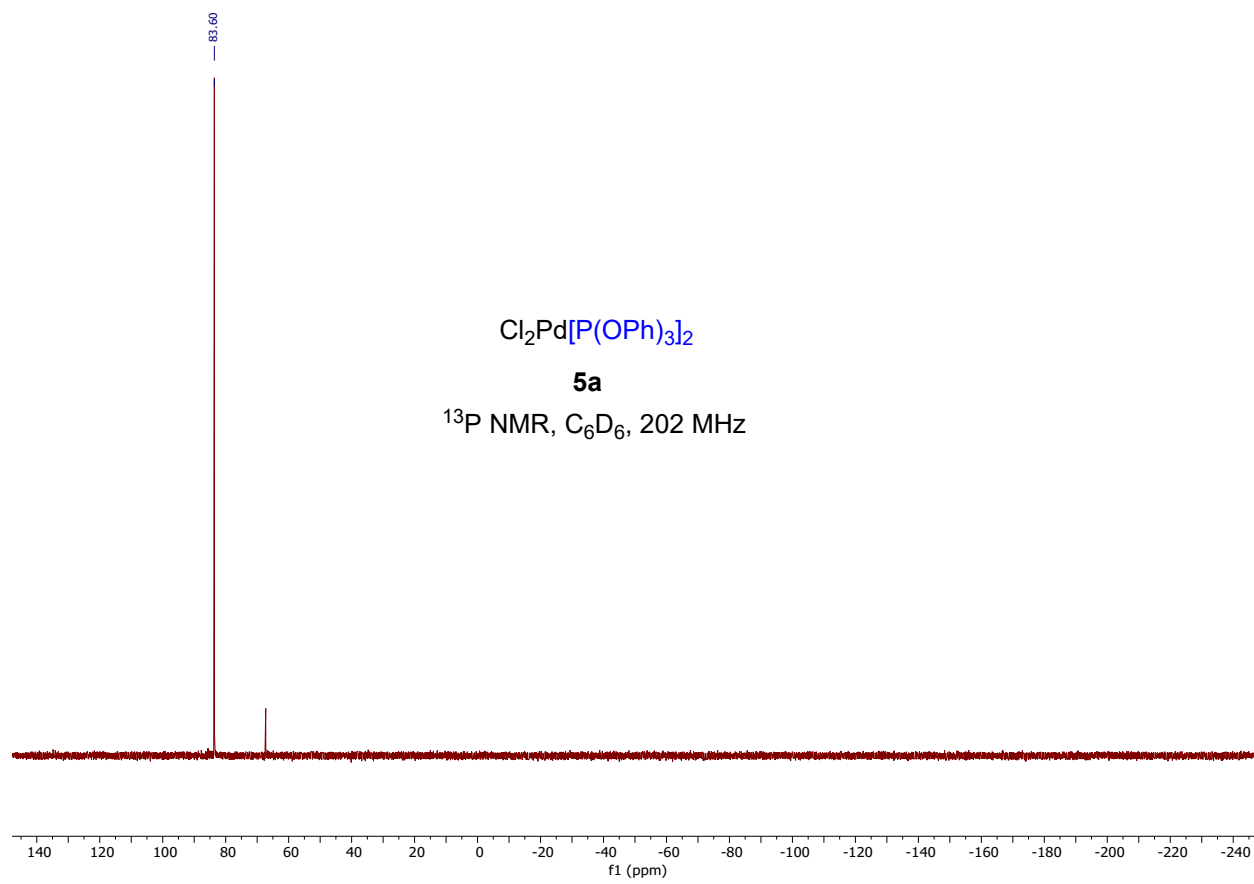

S62

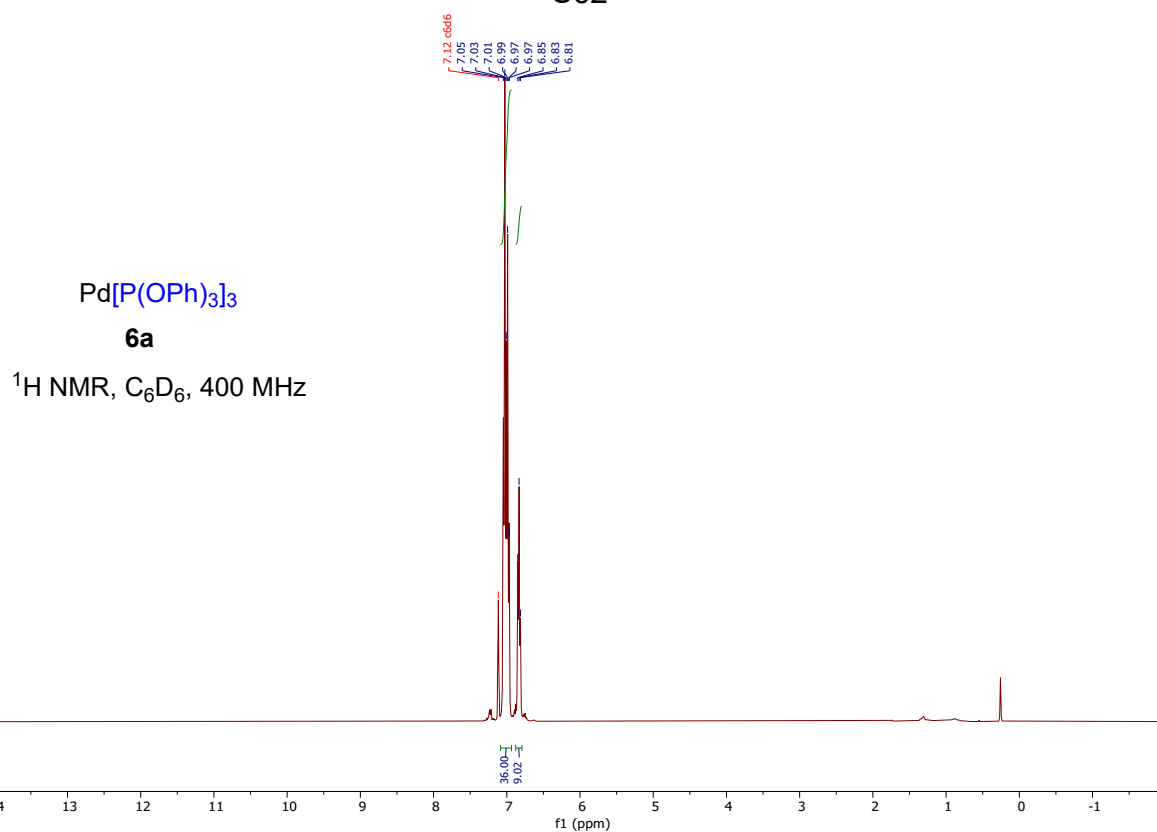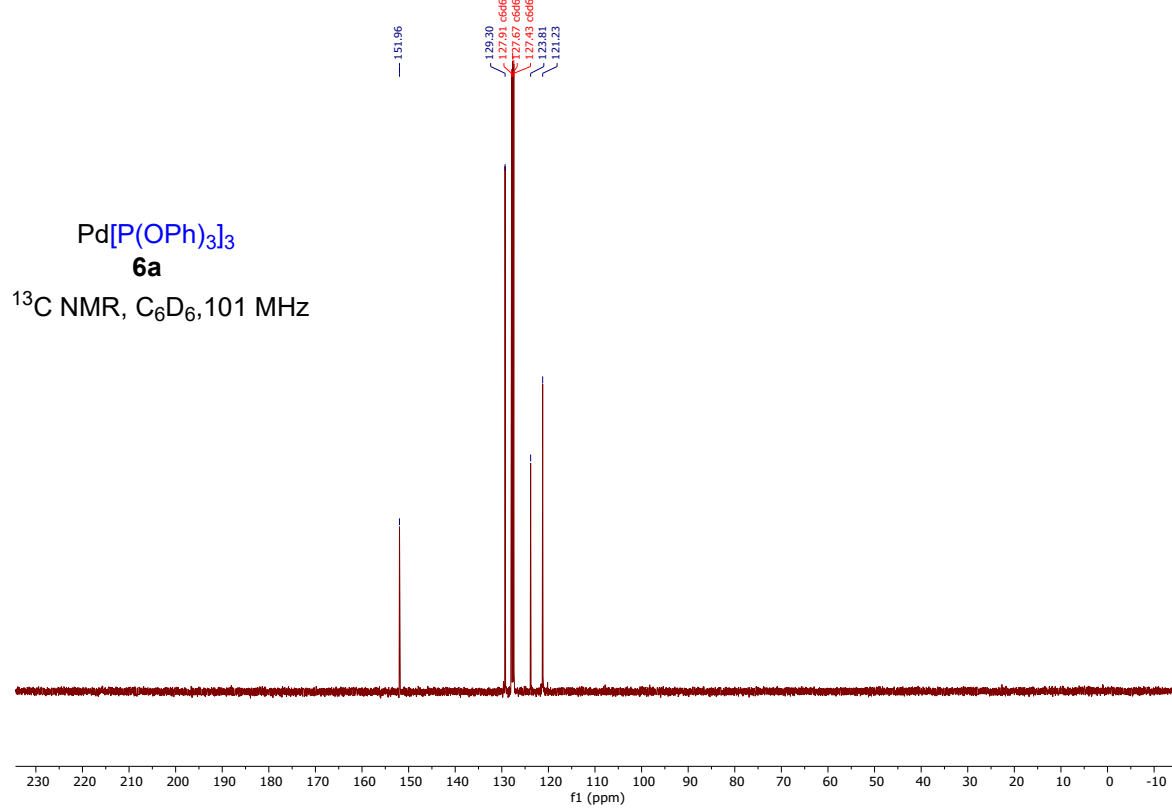



S63

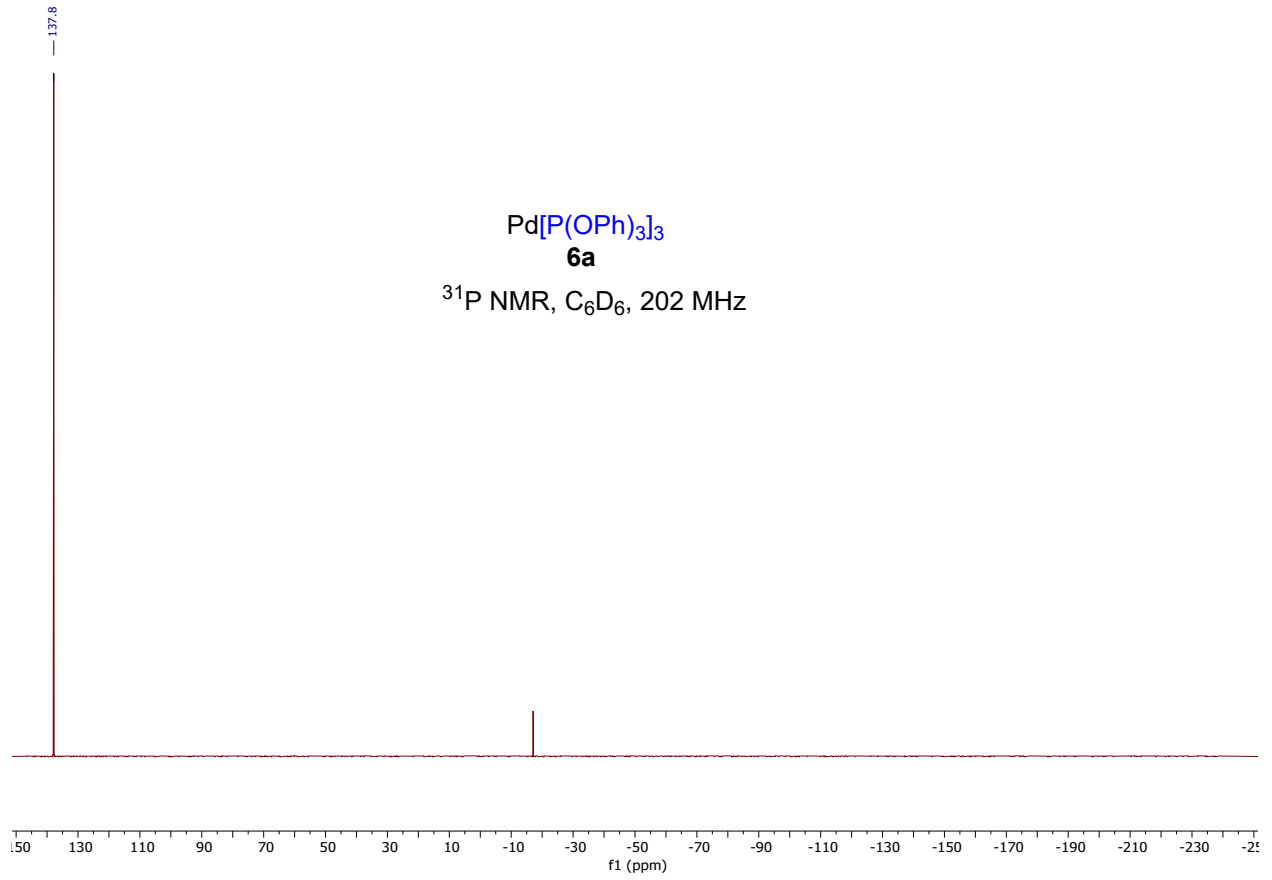

## 14. References

- [1] B. Lv, P. Gao, S. Zhang, X. Jia, M. Wang, Y. Yuan, *Org. Chem. Front.* **2021**, *8*, 5440-5445.
- [2] a) M. G. vel Górnica, A. Czernicka, P. Młynarz, W. Balcerzak, P. Kafarski, *Beilstein J. Org. Chem.* **2014**, *10*, 741-745; b) M. Mao, L. Zhang, H. Yao, L. Wan, Z. Xin, *ACS omega* **2020**, *5*, 9503-9509; c) M. Oba, Y. Okada, K. Nishiyama, W. Ando, *Org. Lett.* **2009**, *11*, 1879-1881; d) C. T. Estorach, A. Orejón, A. M. Masdeu-Bultó, *Green Chem.* **2008**, *10*, 545-552; e) Y. Zhang, Z. Cai, Y. Chi, X. Zeng, S. Chen, Y. Liu, G. Tang, Y. Zhao, *Org. Lett.* **2021**, *23*, 5158-5163.
- [3] K. Wang, M. Tong, Y. Yang, B. Zhang, H. Liu, H. Li, F. Zhang, *Green Chem.* **2020**, *22*, 7417-7423.
- [4] a) A. M. Trzeciak, J. J. Ziółkowski, *Monatsh. Chem.* **2000**, *131*, 1281-1291; b) A. M. Trzeciak, Z. Ciunik, J. J. Ziółkowski, *Organometallics* **2002**, *21*, 132-137.
- [5] T. Yurino, S. Saito, M. Ichihashi, T. Ohkuma, *J. Org. Chem.* **2022**, *87*, 2864-2872.
- [6] R. Ghosh, B. Olofsson, *Org. Lett.* **2014**, *16*, 1830-1832.
- [7] L. C. M. Castro, N. Chatani, *Synthesis* **2014**, *46*, 2312-2316.
- [8] a) J. N. Kim, K. M. Kim, E. K. Ryu, *Synth. Commun.* **1992**, *22*, 1427-1432; b) N. Pawar, U. Kapadi, D. Hundiware, P. Kumbhar, *J. Sci. Ind. Res.* **2002**, *61*, 454-456.
